# Supplementary material for: A Multi-Faceted Analysis Showing CRNDE Transcripts and a Recently Confirmed Micropeptide as Important Players in Ovarian Carcinogenesis
Source: MDPI journal article supplement (doi:10.3390/ijms25084381), 2024-04-16
Supplement: s1 [file s1]

Supplementary Materials for

**Multi-faceted analysis showing *CRNDE* transcripts and the lately confirmed micropeptide as important players in ovarian carcinogenesis**

Anna Balcerak *et al.*

Corresponding author's email: [lukszafron@gmail.com](mailto:lukszafron@gmail.com)

## Supplementary Text

### Mass spectrometry-based identification of the CRNDEP micropeptide

#### **1. Immunoprecipitation (IP), IP sample preparation, protein digestion and peptide fractionation**

The IP experiment was conducted according to Thermo recommendations, using 10 ml of a protein lysate (conc. 11.6 mg/ml), generated with RIPA+inhibitors, from one high-grade ovarian carcinoma (hgOvCa) sample characterized by high CRNDEP expression. Based on our dot blot analysis, utilizing a standard curve made of a synthetic CRNDEP epitope (in known concentrations), earlier used for the anti-CRNDEP antibody development, we estimated that the given amount of the lysate should contain approximately 10 nanomoles of CRNDEP. Apart from the lysate, 240 µg of the anti-CRNDEP antibody and 640 µl of the Dynabeads Protein A (Thermo) magnetic resin were used in this IP experiment. CRNDEP was then eluted from the resin with 0.1 M glycine, pH = 2 followed by instant neutralization of the sample with 1M TRIS buffer, pH = 8.5, which gave the final IP eluate in the total amount of 3.3 ml. 1.98 ml of this eluate (corresponding to about 6 nanomoles of CRNDEP) were used as a sample for the mass spectrometry analysis. This sample was buffered with 100 mM triethylammonium bicarbonate (TEAB) and supplemented with 5% trifluoroethanol. Cysteine bridges were reduced by 1 hour incubation with 10 mM tris(2-carboxyethyl)phosphine (TCEP) at 37°C followed by the reaction with 25 mM s-methylmethanethiosulfonate (MMTS). Proteins were transferred onto three Vivacon 30 kDa cut-off filters (Sartorius AG, Göttingen, Germany) and spun at 14,500 g for 30 min to remove high-molecular-mass proteins. An additional step of elution, with 0.5 M NaCl, was performed to improve recovery. Combined eluates were digested overnight at 37 °C with 4 µg of trypsin (Promega). Samples were dried and then resuspended in 10 mM ammonium hydroxide (AH). Afterward, peptides were fractionated using high-pH reverse-phase chromatography on eight C18 Evotip trap columns (Evosep Biosystems, Odense, Denmark). Evotips were activated with 25 µl of 0.1% formic acid (FA) in acetonitrile (ACN) by 1 min centrifugation at 600 g followed by 2 min incubation in 2-propanol. After equilibration with 100 µl of 10 mM AH in water, the peptide solution was loaded onto the solid phase. The elution was carried out in rising ACN concentrations in the presence of 10 mM AH. Five fractions were collected using the following solutions: 5% ACN, 10% ACN, 15% ACN, 40% ACN and 100% ACN. Peptides were then dried in Speedvac overnight and reconstituted in the liquid chromatography – mass spectrometry (LC-MS) phase A (0.1% FA in water).

#### **2. LC-MS analysis**

The peptide fractions were analyzed using LC-MS system composed of Evosep One (Evosep Biosystems) coupled with the Orbitrap Exploris 480 mass spectrometer (Thermo) via Flex ion source (Thermo). Samples were loaded onto disposable Evotips C18 trap columns according to the manufacturer's protocol. Chromatography was carried out at a 220 nl/min flow rate using the 88 min (15 samples per day) preformed gradient on the EV1106 analytical column (Dr Maisch C18 AQ, 1.9 µm beads, 150 µm ID, 15 cm long, Evosep Biosystems). MS data were acquired in positive mode with a data-dependent method (DDA) using the following ion optics parameters: HCD normalized



collision energy of 30%, spray voltage set to 2.1 kV, funnel RF level set to 40, and a heated capillary temperature set to 275 °C. DDA Cycle time was 1 s. Internal Mass Calibration by EASY-IC was used in the Run Start mode. The MS1 resolution was set to 120,000 with a 500% normalized AGC target, Auto maximum inject time and a scan range of 200 to 2,000 m/z. Preferably the ions with the maximum charge of 6, m/z within the range of 200-2,000 and corresponding to 5-40 aa length tryptic peptides derived from CRNDEP with the maximum of 2 missed cleavages and Methylthio (C) modification were subjected to fragmentation. Inclusion list Mass tolerance was set to 10 ppm with the option of a dependent scan on other most intense ions set to off. For MS2, the resolution was set to 30,000 with a 1,000% normalized AGC target and Auto maximum inject time.

### **3. MS data processing**

The acquired MS/MS raw data files were processed to peak lists with Mascot Distiller (v. 2.5.1, Boston, MA, USA) and submitted to the Mascot search engine (v. 2.5.1, Matrix Science). The database was composed of SwissProt *Homo sapiens* entries, and contaminant proteins retrieved from the common Repository of Adventitious Proteins. The search parameters were as follows: enzyme specificity – semitrypsin; number of missed cleavages – 2; parent and fragment ions mass error tolerances – 10 ppm and 0.1 Da, respectively; fixed modification – Methylthio C; variable modification – Oxidation M. The statistical significance of identifications was determined using a target/decoy database approach and a procedure that provided q-value estimates for each peptide spectrum match (PSM) in the data set. Only PSMs with q-values  $\leq 0.01$  were regarded as confidently identified. All the peptide sequences matched to database entries representing contaminant proteins were rejected. Proteins represented by less than two peptides were excluded from further analysis. Proteins identified by a subset of peptides from other proteins were filtered out from the results, and those matching the same set of peptides were grouped together into metaproteins. Mascot results postprocessing was performed using the MScan app, available at <http://proteom.ibb.waw.pl/mscan>.

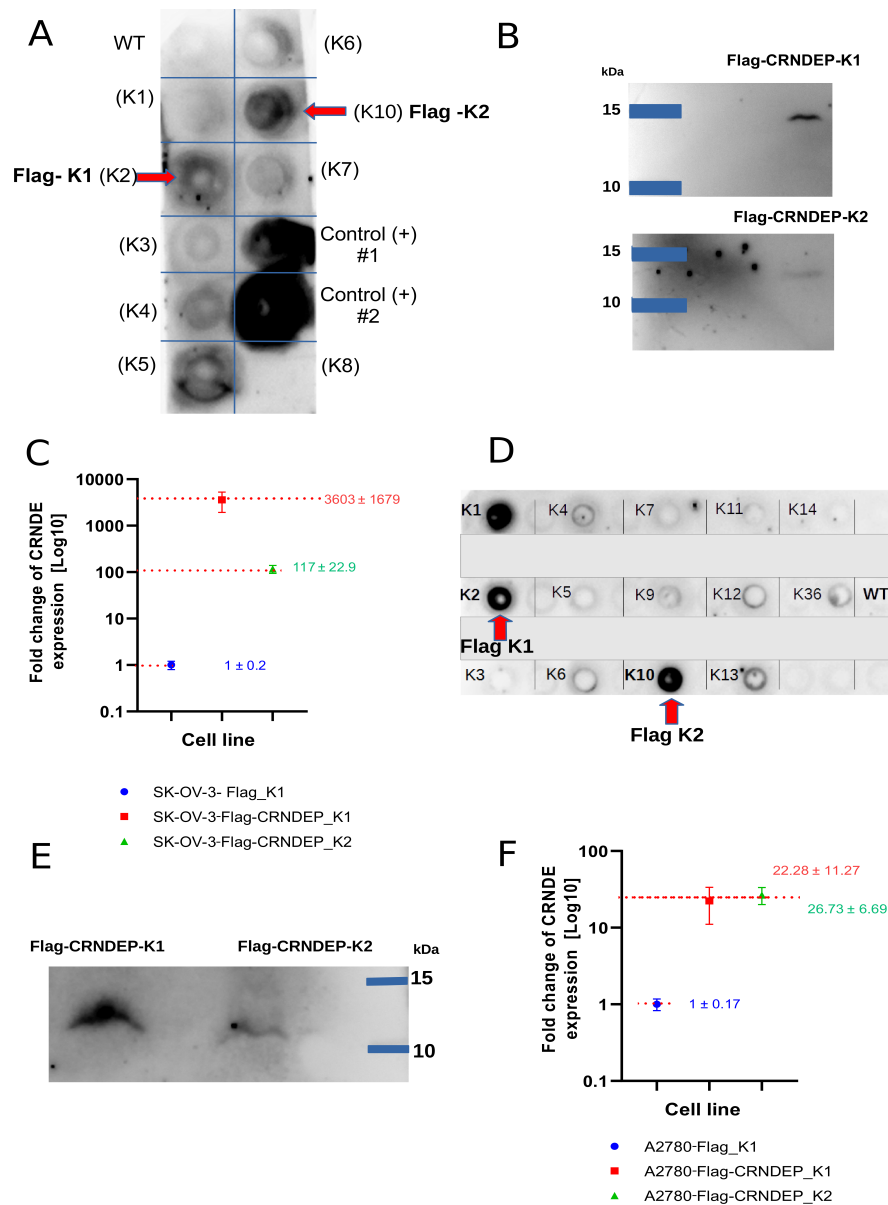

**Fig. S1. Analysis of Flag-tag or CRNDEP-Flag fusion protein stable expression in SK-OV-3 (A,B,C) and A2780 (D,E,F) cells using the anti-Flag antibody. A:** Daughter SK-OV-3 cell line clones with the highest expression of the Flag tag integrated into the AAVS1 site (Flag-K1(K2) and Flag-K2(K10)) are marked with red arrows. The K5 clone was morphologically less similar to the mother SK-OV-3 cells than the daughter Flag-K1(K2) and Flag-K2(K10) clones, therefore it was excluded from further analyses. As a positive control (+), a protein lysate from HeLa cells ectopically expressing the Flag tag fused to CRNDEP, encoded by the pCR3-2xFLAG-CRNDEP plasmid, was used. **B:** Western blot analysis for two clones (Flag-CRNDEP\_K1, and Flag-CRNDEP\_K2) of the SK-OV-3 cell line with stable expression of the CRNDEP-Flag fusion protein. **C:** The RT-qPCR analysis of *CRNDE* expression in SK-OV-3-Flag-CRNDEP\_K1 and SK-OV-3-Flag-CRNDEP\_K2 clones. As reference genes, *HGPRT* and *PPIA* were used. The results were calibrated to the control SK-OV-3-Flag\_K1 clone. **D:** Daughter A2780 cell line clones with the highest expression of the Flag tag integrated into the AAVS1 site (Flag-K1(K2) and Flag-K2(K10)) are marked with red arrows. The K1 clone was morphologically less similar to mother A2780 cells than the daughter Flag-K1(K2) and Flag-K2(K10) clones, therefore it was excluded from further analyses. **E:** Western blot analysis for two clones (Flag-CRNDEP\_K1, and Flag-CRNDEP\_K2) of the A2780 cell line with stable expression of the CRNDEP-Flag fusion protein. **F:** RT-qPCR analysis of *CRNDE* expression in A2780 Flag-CRNDEP\_K1 and Flag-CRNDEP\_K2 clones. As reference genes, *HGPRT* and *PPIA* were used. The results were calibrated to the control A2780-Flag\_K1 clone. AAVS1: Adeno-Associated Virus Integration Site 1.

## Efficacy of *CRNDE* knockdown in HeLa cells

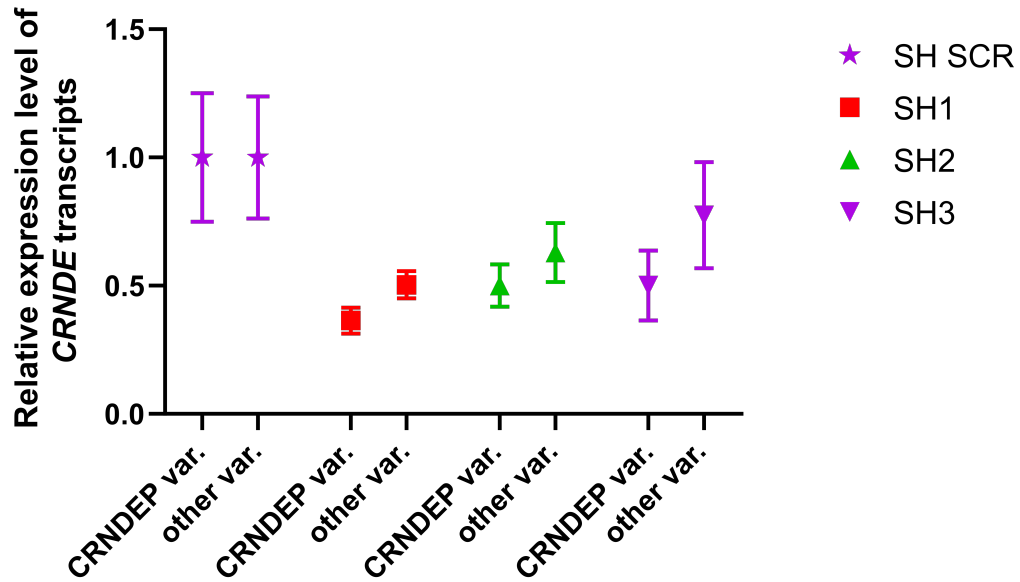

**Fig. S2. Transient silencing of different *CRNDE* transcripts in HeLa cells.** Three shRNAs (SH1, SH2 and SH3) were used for *CRNDE* silencing. Verification of *CRNDE* transcripts' expression was performed using RT-qPCR. As references, the *HGPRT* and *PPIA* genes were used. Results obtained for the three *CRNDE*-silencing shRNAs were calibrated to the expression of *CRNDE* transcripts obtained for the HeLa cell line transiently expressing the control shRNA, SH SCR (scrambled). CRNDEP var. – CRNDEP-coding transcript; other var. – other *CRNDE* transcripts.

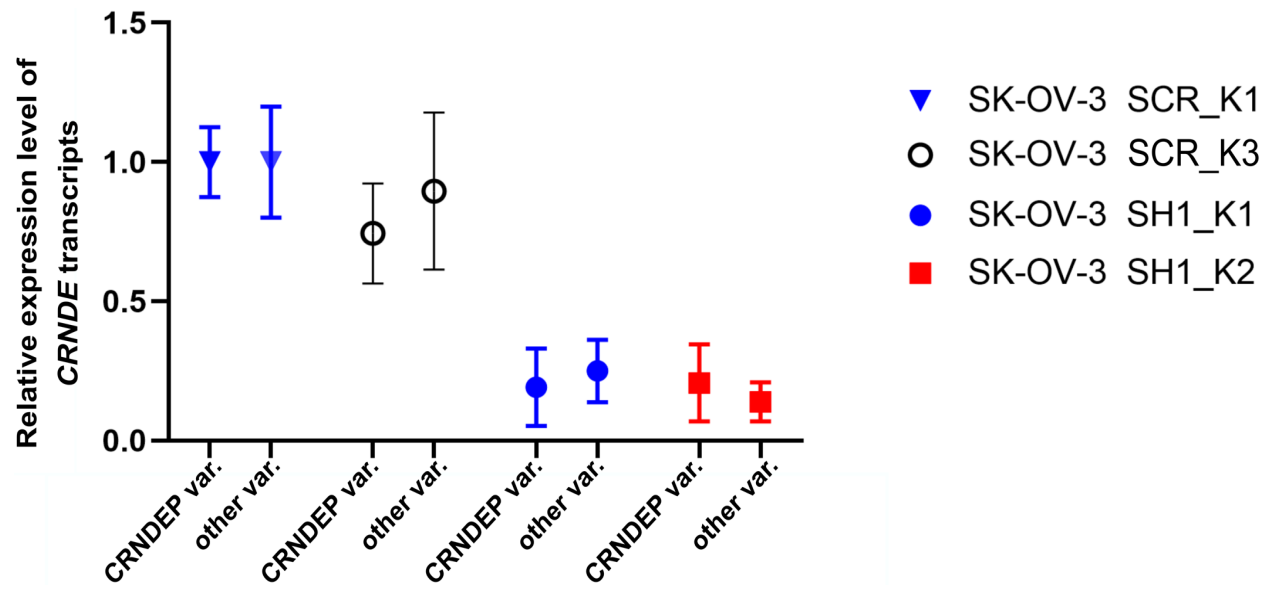

**Fig. S3. *CRNDE* transcripts' expression in SK-OV-3 cells with stable *CRNDE* silencing.** Expression of *CRNDE* transcripts was assessed by RT-qPCR. As references, *HGPRT* and *PPIA* genes were used. The results were calibrated to the expression of *CRNDE* transcripts obtained for the SK-OV-3 cell line stably expressing the control shRNA, SCR\_K1. CRNDEP var. – CRNDEP-coding transcript; other var. – other *CRNDE* transcripts.

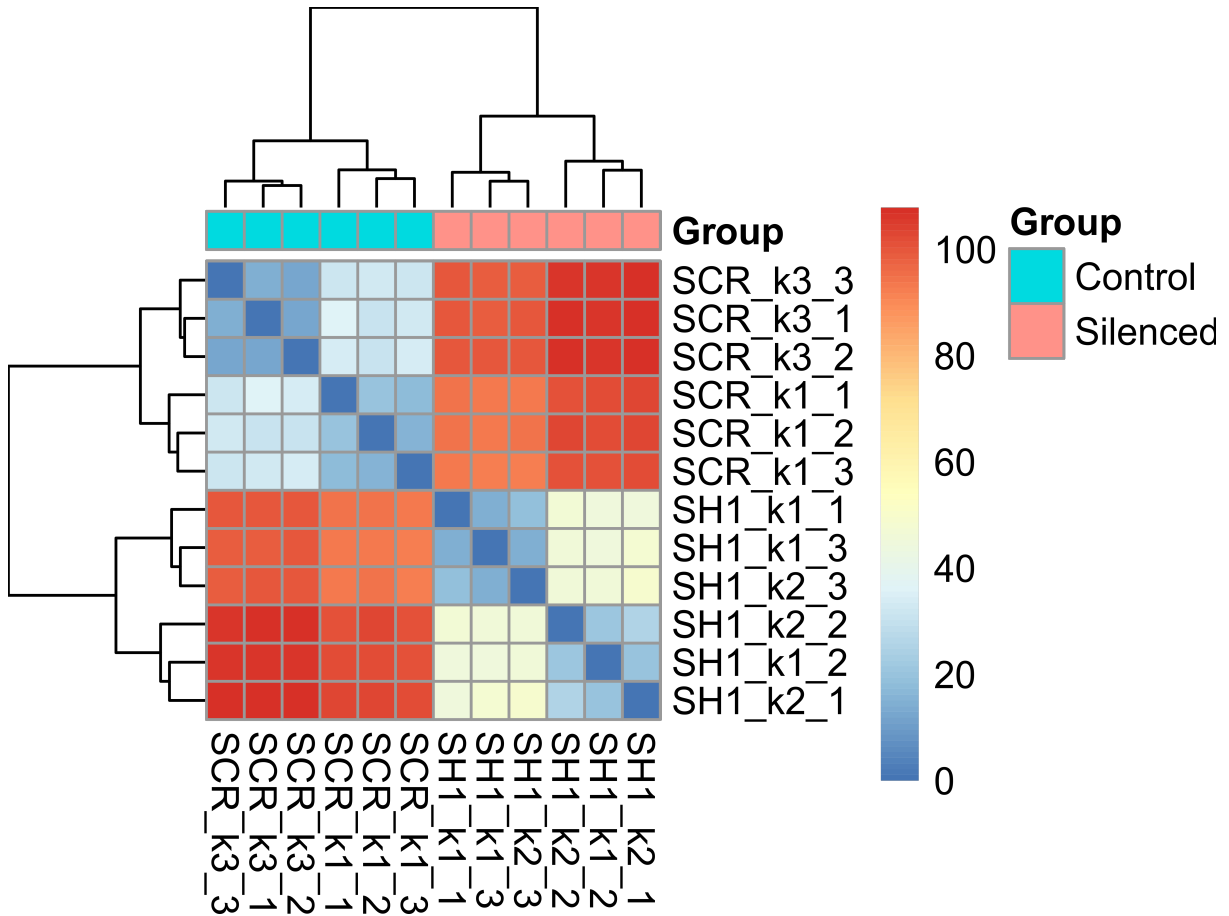

**Fig. S4. Overall transcriptomic differences between SK-OV-3 cells with (clones SH1\_k1 and SH1\_k2) and without (clones SCR\_k1 and SCR\_k3) *CRNDE* silencing.** The distances in expression patterns between the samples are displayed here as a heatmap with hierarchical clustering. The analysis revealed great similarity in expression profiles between the SK-OV-3 cells with *CRNDE* knockdown and also between the control SK-OV-3 cells. By contrast, the expression differences between the silenced (SK-OV-3-SH1) and the control (SK-OV-3-SCR) cells were clearly visible.

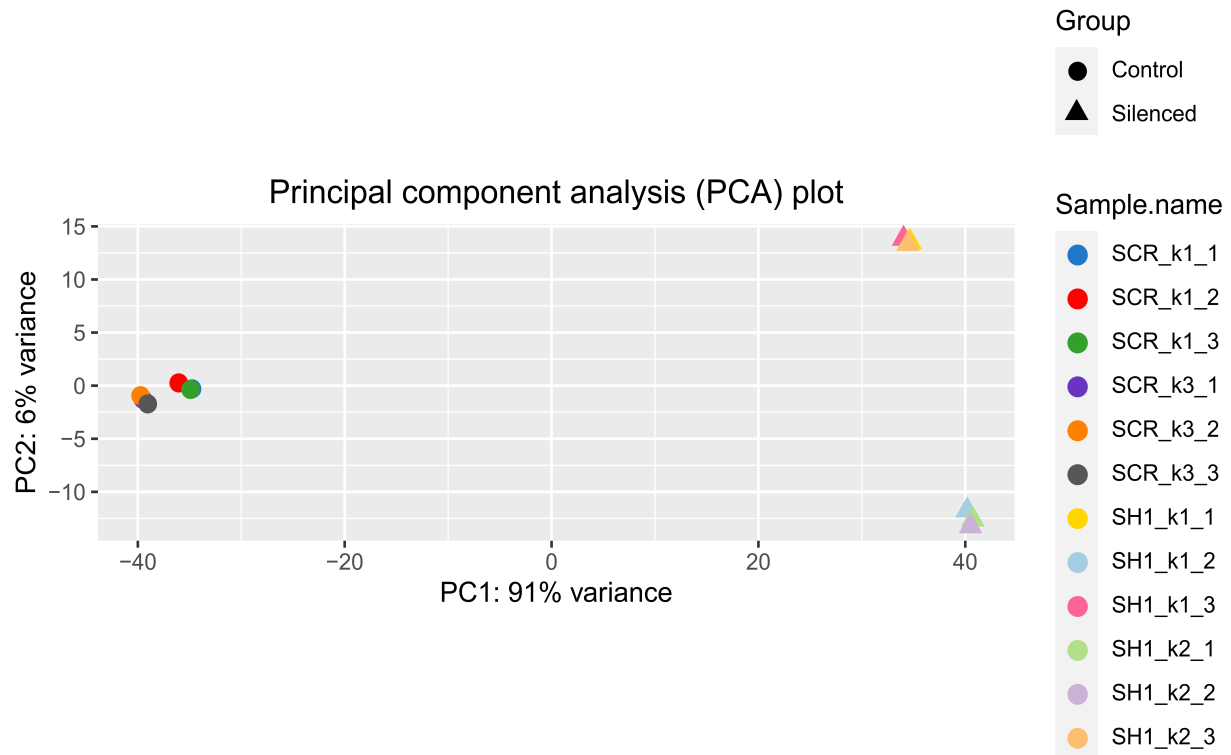

**Fig. S5. Principal Component Analysis (PCA) of the RNA-seq data obtained for SK-OV-3 cells with (clones SH1\_k1 and SH1\_k2) and without (clones SCR\_k1 and SCR\_k3) *CRNDE* silencing.** The differences between the cells with *CRNDE* silencing and the control cells accounted for 91% of the total gene expression variance in this sample set (PC1).

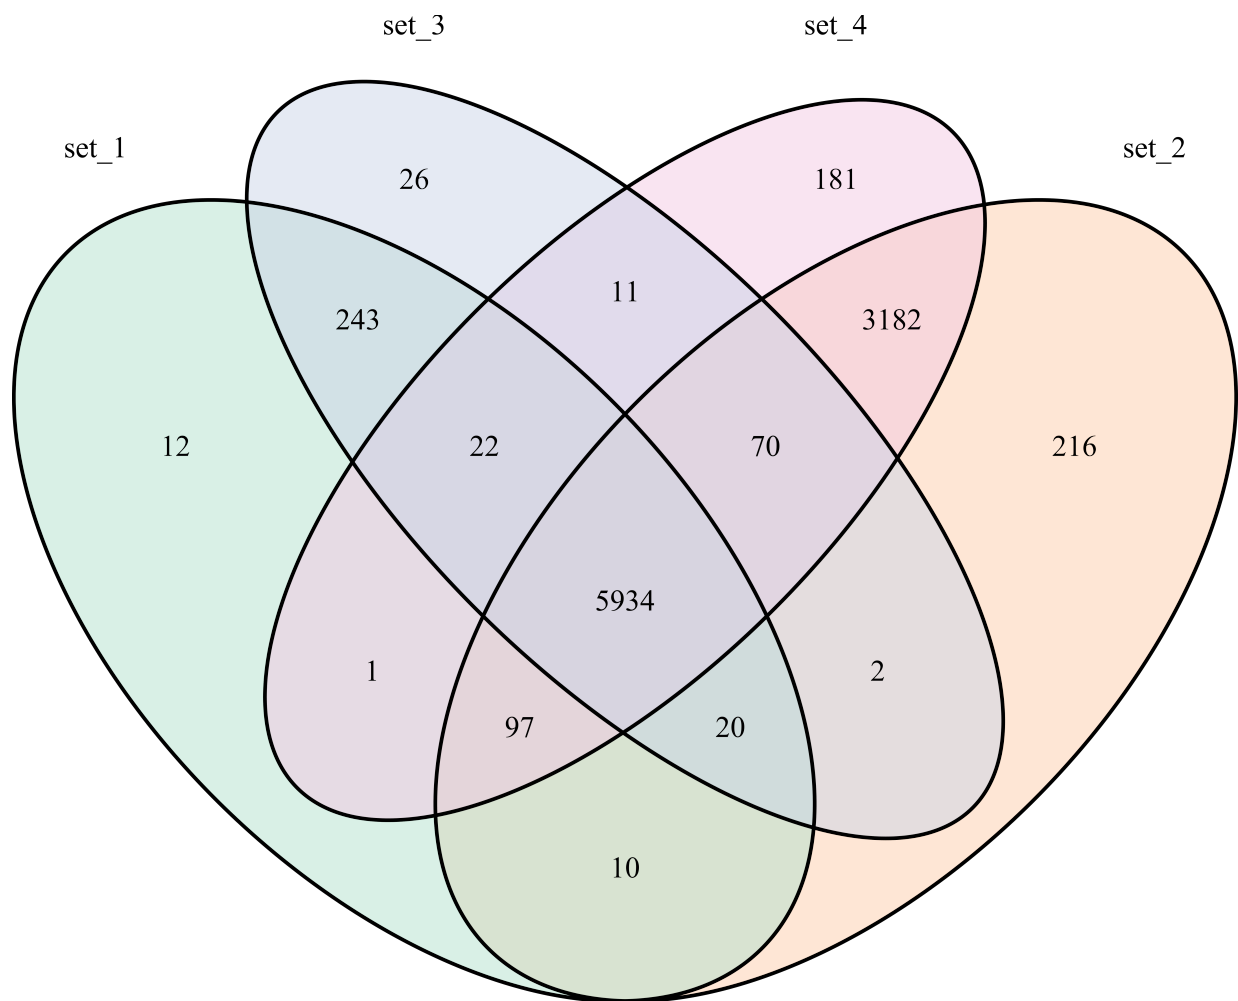

**Fig. S6. Venn diagram depicting similarity of four gene sets, comprising genes with significantly altered expression after *CRNDE* silencing.** These gene sets were obtained by using different combinations of sequence aligning (HISAT2, STAR) and expression analyzing (DESeq2, edgeR) programs. Set\_1: HISAT2 and DESeq2, Set\_2: HISAT2 and edgeR, Set\_3: STAR and DESeq2, Set\_4: STAR and edgeR.

## HISAT2/DESeq2 differential expression analysis results for common genes

Number of significantly down-regulated genes: 29

Number of significantly up-regulated genes: 79

Pearson's Chi-squared test p-value = 3.166e-06

▽ NS    ▽ Log<sub>2</sub> FC    ● p-value    ● p-value and log<sub>2</sub> FC

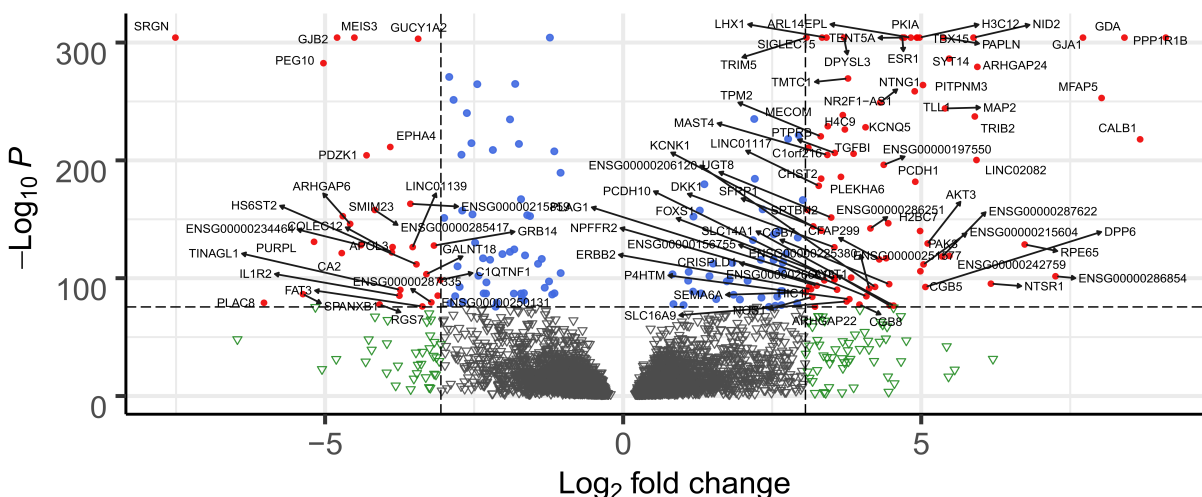

log2FC cutoff = 3.06

BH-adjusted p-value cutoff = 2.45e-76

**Fig. S7. Volcano plot for common set of 5934 differentially expressed genes (using p-values and FC values obtained with the HISAT2 and DESeq2 programs).** Blue dots represent genes that meet only the Benjamini-Hochberg-adjusted p-value cutoff ( $2.45\text{E-}76$ ), green triangles denote genes meeting the  $|\log_2\text{FC}|$  cutoff of 3.06. Genes passing both filters (red dots) have their names displayed on the plot. The plot is additionally supplemented with numbers of significantly up- and down-regulated genes, as well as the Pearson's Chi-squared test result.



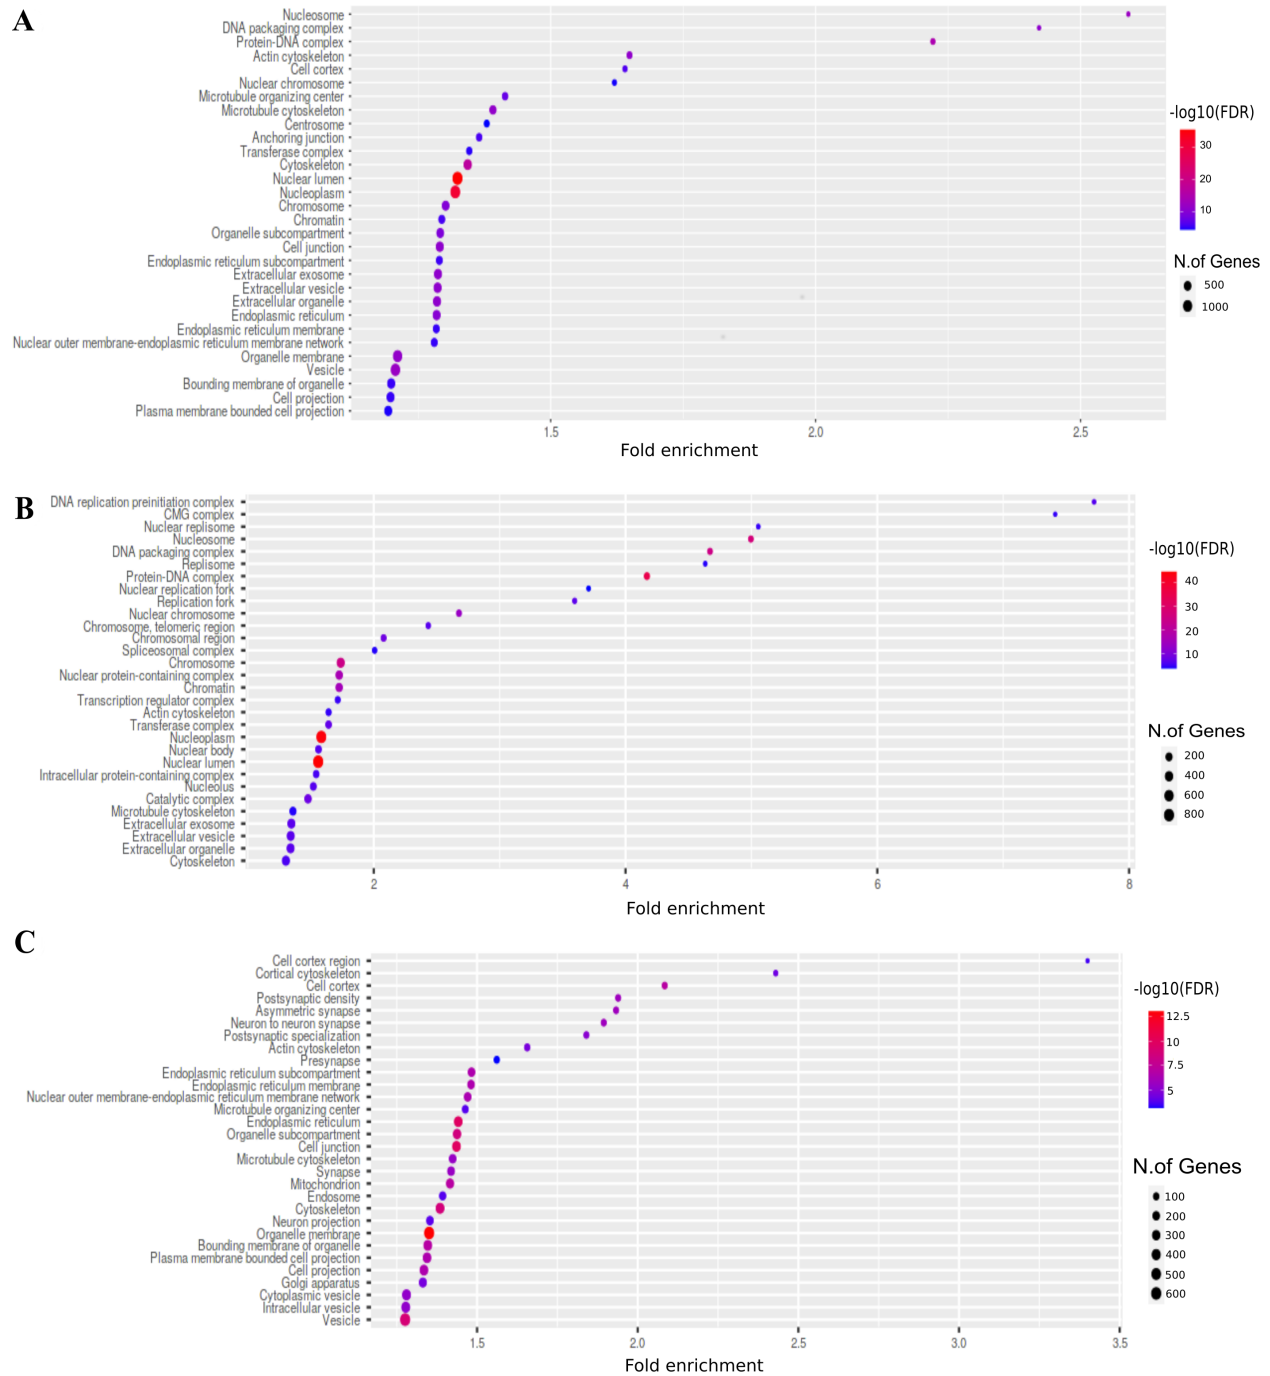

**Fig. S8. Gene ontology analysis (cellular components, CC) performed for our RNA-seq data with the ShinyGo app and the GO database.** All graphs represent ontological terms most enriched in genes, expression of which was significantly altered after *CRNDE* silencing. In all the graphs, terms are sorted according to the decreasing fold enrichment values. **A:** terms enriched in genes expression of which was both increased or decreased ( $FC \leq 0.8$  or  $FC \geq 1.2$ ) after *CRNDE* silencing; **B:** terms enriched in genes with increased expression after *CRNDE* silencing ( $FC \geq 1.2$ ); **C:** terms enriched in genes with decreased expression after *CRNDE* silencing ( $FC \leq 0.8$ ), when compared to the control cell lines.

**Table S1. Gene ontology analysis (CC) performed for our RNA-seq data with the EnrichR app and the GO database.**

**A**

| Cellular component FC $\leq 0.8$ or FC $\geq 1.2$ |                                                       |                                            |                                                 |              |
|---------------------------------------------------|-------------------------------------------------------|--------------------------------------------|-------------------------------------------------|--------------|
| #                                                 | Ontological terms                                     | Ratio of identified genes in each category | Percentage of identified genes in each category | Adj. p-value |
| 1.                                                | cytoskeleton (GO:0005856)                             | 226/600                                    | 37.7%                                           | 1.7E-07      |
| 2.                                                | intracellular membrane-bounded organelle (GO:0043231) | 1540/5192                                  | 29.7%                                           | 1.7E-07      |
| 3.                                                | nucleus (GO:0005634)                                  | 1321/4484                                  | 29.5%                                           | 2.1E-05      |
| 4.                                                | actin cytoskeleton (GO:0015629)                       | 117/316                                    | 37.0%                                           | 2.5E-03      |
| 5.                                                | endosome membrane (GO:0010008)                        | 118/325                                    | 36.3%                                           | 4.9E-03      |
| 6.                                                | endoplasmic reticulum membrane (GO:0005789)           | 231/712                                    | 32.4%                                           | 1.3E-02      |
| 7.                                                | focal adhesion (GO:0005925)                           | 133/387                                    | 34.4%                                           | 1.9E-02      |
| 8.                                                | cell-substrate junction (GO:0030055)                  | 135/394                                    | 34.3%                                           | 1.9E-02      |
| 9.                                                | CMG complex (GO:0071162)                              | 8/10                                       | 80.0%                                           | 3.3E-02      |
| 10.                                               | intracellular organelle lumen (GO:0070013)            | 264/848                                    | 31.1%                                           | 4.9E-02      |

**B**

| Cellular component FC $\geq 1.2$ |                                                           |                                            |                                                 |              |
|----------------------------------|-----------------------------------------------------------|--------------------------------------------|-------------------------------------------------|--------------|
| #                                | Ontological terms                                         | Ratio of identified genes in each category | Percentage of identified genes in each category | Adj. p-value |
| 1.                               | nucleus (GO:0005634)                                      | 766/4484                                   | 17.1%                                           | 2.18E-14     |
| 2.                               | intracellular membrane-bounded organelle (GO:0043231)     | 866/5192                                   | 16.7%                                           | 2.28E-14     |
| 3.                               | intracellular non-membrane-bounded organelle (GO:0043232) | 218/1158                                   | 18.8%                                           | 3.77E-06     |
| 4.                               | nuclear lumen (GO:0031981)                                | 151/745                                    | 20.3%                                           | 4.26E-06     |
| 5.                               | nucleolus (GO:0005730)                                    | 143/733                                    | 19.5%                                           | 7.96E-05     |
| 6.                               | CMG complex (GO:0071162)                                  | 8/10                                       | 80.0%                                           | 2.30E-04     |
| 7.                               | chromosome (GO:0005694)                                   | 42/160                                     | 26.3%                                           | 4.82E-04     |
| 8.                               | alpha DNA polymerase:primase complex (GO:0005658)         | 5/5                                        | 100.0%                                          | 2.12E-03     |
| 9.                               | cytoskeleton (GO:0005856)                                 | 113/600                                    | 18.8%                                           | 2.89E-03     |
| 10.                              | Golgi medial cisterna (GO:0005797)                        | 7/11                                       | 63.6%                                           | 6.00E-03     |
| 11.                              | nuclear chromosome (GO:0000228)                           | 23/83                                      | 27.7%                                           | 1.39E-02     |
| 12.                              | actin cytoskeleton (GO:0015629)                           | 63/316                                     | 19.9%                                           | 1.92E-02     |
| 13.                              | focal adhesion (GO:0005925)                               | 73/387                                     | 18.9%                                           | 3.45E-02     |
| 14.                              | cell-substrate junction (GO:0030055)                      | 74/394                                     | 18.8%                                           | 3.45E-02     |
| 15.                              | ESC/E(Z) complex (GO:0035098)                             | 5/8                                        | 62.5%                                           | 4.45E-02     |

**C**

| Cellular component FC $\leq 0.8$ |                                                            |                                            |                                                 |              |
|----------------------------------|------------------------------------------------------------|--------------------------------------------|-------------------------------------------------|--------------|
| #                                | Ontological terms                                          | Ratio of identified genes in each category | Percentage of identified genes in each category | Adj. p-value |
| 1.                               | endoplasmic reticulum membrane (GO:0005789)                | 136/712                                    | 19.10%                                          | 6.81E-03     |
| 2.                               | endosome membrane (GO:0010008)                             | 69/325                                     | 21.23%                                          | 1.60E-02     |
| 3.                               | postsynaptic density (GO:0014069)                          | 35/138                                     | 25.36%                                          | 1.60E-02     |
| 4.                               | asymmetric synapse (GO:0032279)                            | 34/133                                     | 25.56%                                          | 1.60E-02     |
| 5.                               | lysosome (GO:0005764)                                      | 90/477                                     | 18.87%                                          | 5.28E-02     |
| 6.                               | cytoskeleton (GO:0005856)                                  | 109/600                                    | 18.17%                                          | 5.29E-02     |
| 7.                               | spermatoproteasome complex (GO:1990111)                    | 4/5                                        | 80.00%                                          | 9.01E-02     |
| 8.                               | endoplasmic reticulum tubular network (GO:0071782)         | 9/23                                       | 39.13%                                          | 1.01E-01     |
| 9.                               | early endosome membrane (GO:0031901)                       | 24/97                                      | 24.74%                                          | 1.01E-01     |
| 10.                              | intrinsic component of mitochondrial membrane (GO:0098573) | 6/12                                       | 50.00%                                          | 1.06E-01     |

Ontological terms most enriched in genes, expression of which was significantly altered after *CRNDE* silencing, are sorted according to the increasing FDR-adjusted p-value. In table **A**, terms most enriched in all differentially expressed genes (up- and downregulated) are shown; Tables **B** and **C** include terms most enriched in up-regulated genes (FC  $\geq 1.2$ ) and down-regulated genes (FC  $\leq 0.8$ ), respectively, when compared to the control cells. FC – fold change.

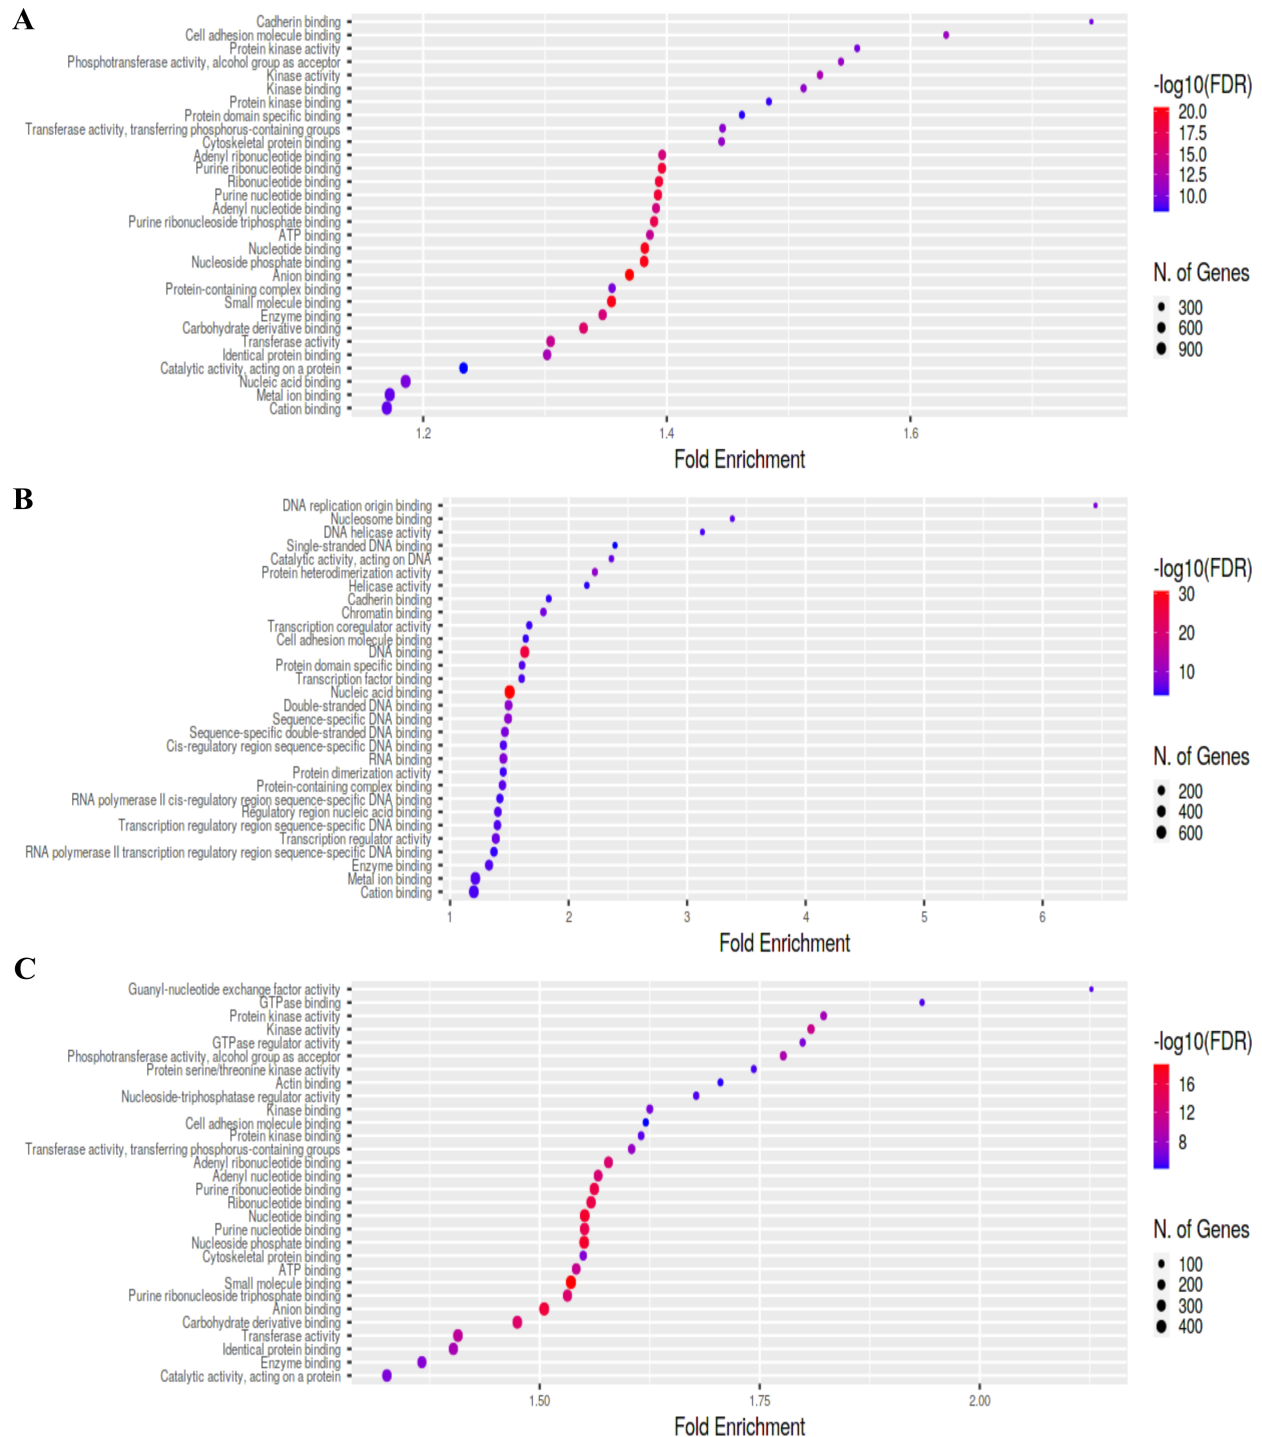

**Fig. S9. Gene ontology analysis (molecular functions, MF) performed for our RNA-seq data with the ShinyGo app and the GO database.** All graphs represent ontological terms most enriched in genes, expression of which was significantly altered after *CRNDE* silencing. In all the graphs, terms are sorted according to the decreasing fold enrichment values. **A:** terms enriched in genes expression of which was both increased or decreased ( $\text{FC} \leq 0.8$  or  $\text{FC} \geq 1.2$ ) after *CRNDE* silencing; **B:** terms enriched in genes with increased expression after *CRNDE* silencing ( $\text{FC} \geq 1.2$ ); **C:** terms enriched in genes with decreased expression after *CRNDE* silencing ( $\text{FC} \leq 0.8$ ), when compared to the control cell lines.

**Table S2. Gene ontology analysis (MF) performed for our RNA-seq data with the EnrichR app and the GO database.**

**A**

| Molecular Function $FC \leq 0.8$ or $FC \geq 1.2$ |                                                                                                    |                                            |                                                 |              |
|---------------------------------------------------|----------------------------------------------------------------------------------------------------|--------------------------------------------|-------------------------------------------------|--------------|
| #                                                 | Ontological terms                                                                                  | Ratio of identified genes in each category | Percentage of identified genes in each category | Adj. p-value |
| 1.                                                | cadherin binding (GO:0045296)                                                                      | 127/322                                    | 39.4%                                           | 2.36E-04     |
| 2.                                                | DNA replication origin binding (GO:0003688)                                                        | 17/23                                      | 73.9%                                           | 1.57E-03     |
| 3.                                                | protein serine/threonine kinase activity (GO:0004674)                                              | 126/344                                    | 36.6%                                           | 7.09E-03     |
| 4.                                                | purine ribonucleoside triphosphate binding (GO:0035639)                                            | 160/460                                    | 34.8%                                           | 1.04E-02     |
| 5.                                                | actin binding (GO:0003779)                                                                         | 71/177                                     | 40.1%                                           | 1.04E-02     |
| 6.                                                | protein kinase binding (GO:0019901)                                                                | 173/506                                    | 34.2%                                           | 1.04E-02     |
| 7.                                                | GTPase activator activity (GO:0005096)                                                             | 121/336                                    | 36.0%                                           | 1.04E-02     |
| 8.                                                | transmembrane receptor protein kinase activity (GO:0019199)                                        | 30/60                                      | 50.0%                                           | 1.05E-02     |
| 9.                                                | transmembrane receptor protein tyrosine kinase activity (GO:0004714)                               | 30/60                                      | 50.0%                                           | 1.05E-02     |
| 10.                                               | kinase binding (GO:0019900)                                                                        | 158/461                                    | 34.3%                                           | 1.20E-02     |
| 11.                                               | DNA binding (GO:0003677)                                                                           | 261/811                                    | 32.2%                                           | 1.25E-02     |
| 12.                                               | guanyl-nucleotide exchange factor activity (GO:0005085)                                            | 60/149                                     | 40.3%                                           | 1.52E-02     |
| 13.                                               | oxidoreductase activity, acting on the CH-CH group of donors, NAD or NADP as acceptor (GO:0016628) | 12/18                                      | 66.7%                                           | 3.64E-02     |
| 14.                                               | adenyl ribonucleotide binding (GO:0032559)                                                         | 107/306                                    | 35.0%                                           | 4.67E-02     |

**B**

| Molecular function $FC \geq 1.2$ |                                                    |                                            |                                                 |              |
|----------------------------------|----------------------------------------------------|--------------------------------------------|-------------------------------------------------|--------------|
| #                                | Ontological terms                                  | Ratio of identified genes in each category | Percentage of identified genes in each category | Adj. p-value |
| 1.                               | DNA binding (GO:0003677)                           | 181/811                                    | 22.3%                                           | 3.95E-10     |
| 2.                               | DNA replication origin binding (GO:0003688)        | 16/23                                      | 69.6%                                           | 4.22E-07     |
| 3.                               | RNA binding (GO:0003723)                           | 245/1406                                   | 17.4%                                           | 8.46E-04     |
| 4.                               | nucleosomal DNA binding (GO:0031492)               | 14/33                                      | 42.4%                                           | 7.97E-03     |
| 5.                               | single-stranded DNA binding (GO:0003697)           | 28/97                                      | 28.9%                                           | 7.97E-03     |
| 6.                               | single-stranded DNA helicase activity (GO:0017116) | 10/19                                      | 52.6%                                           | 7.97E-03     |
| 7.                               | 3'-5' DNA helicase activity (GO:0043138)           | 9/16                                       | 56.3%                                           | 8.32E-03     |
| 8.                               | nuclear receptor coactivator activity (GO:0030374) | 17/53                                      | 32.1%                                           | 4.01E-02     |

**C**

| Molecular function $FC \leq 0.8$ |                                                                      |                                            |                                                 |              |
|----------------------------------|----------------------------------------------------------------------|--------------------------------------------|-------------------------------------------------|--------------|
| #                                | Ontological terms                                                    | Ratio of identified genes in each category | Percentage of identified genes in each category | Adj. p-value |
| 1.                               | transmembrane receptor protein tyrosine kinase activity (GO:0004714) | 21/60                                      | 35.0%                                           | 9.98E-03     |
| 2.                               | GTPase activator activity (GO:0005096)                               | 71/336                                     | 21.1%                                           | 9.98E-03     |
| 3.                               | guanyl-nucleotide exchange factor activity (GO:0005085)              | 38/149                                     | 25.5%                                           | 9.98E-03     |
| 4.                               | transmembrane receptor protein kinase activity (GO:0019199)          | 20/60                                      | 33.3%                                           | 9.98E-03     |
| 5.                               | GTPase binding (GO:0051020)                                          | 47/201                                     | 23.4%                                           | 9.98E-03     |
| 6.                               | protein serine/threonine kinase activity (GO:0004674)                | 70/344                                     | 20.3%                                           | 1.93E-02     |
| 7.                               | aminoacyl-tRNA ligase activity (GO:0004812)                          | 14/38                                      | 36.8%                                           | 2.75E-02     |
| 8.                               | small GTPase binding (GO:0031267)                                    | 40/175                                     | 22.9%                                           | 3.61E-02     |
| 9.                               | protein kinase binding (GO:0019901)                                  | 93/506                                     | 18.4%                                           | 4.76E-02     |
| 10.                              | microtubule binding (GO:0008017)                                     | 49/232                                     | 21.1%                                           | 4.76E-02     |

Ontological terms most enriched in genes, expression of which was significantly altered after *CRNDE* silencing, are sorted according to the increasing FDR-adjusted p-value. In table **A**, terms most enriched in all differentially expressed genes (up- and downregulated) are shown; Tables **B** and **C** include terms most enriched in up-regulated genes ( $FC \geq 1.2$ ) and down-regulated genes ( $FC \leq 0.8$ ), respectively, when compared to the control cells. FC – fold change.

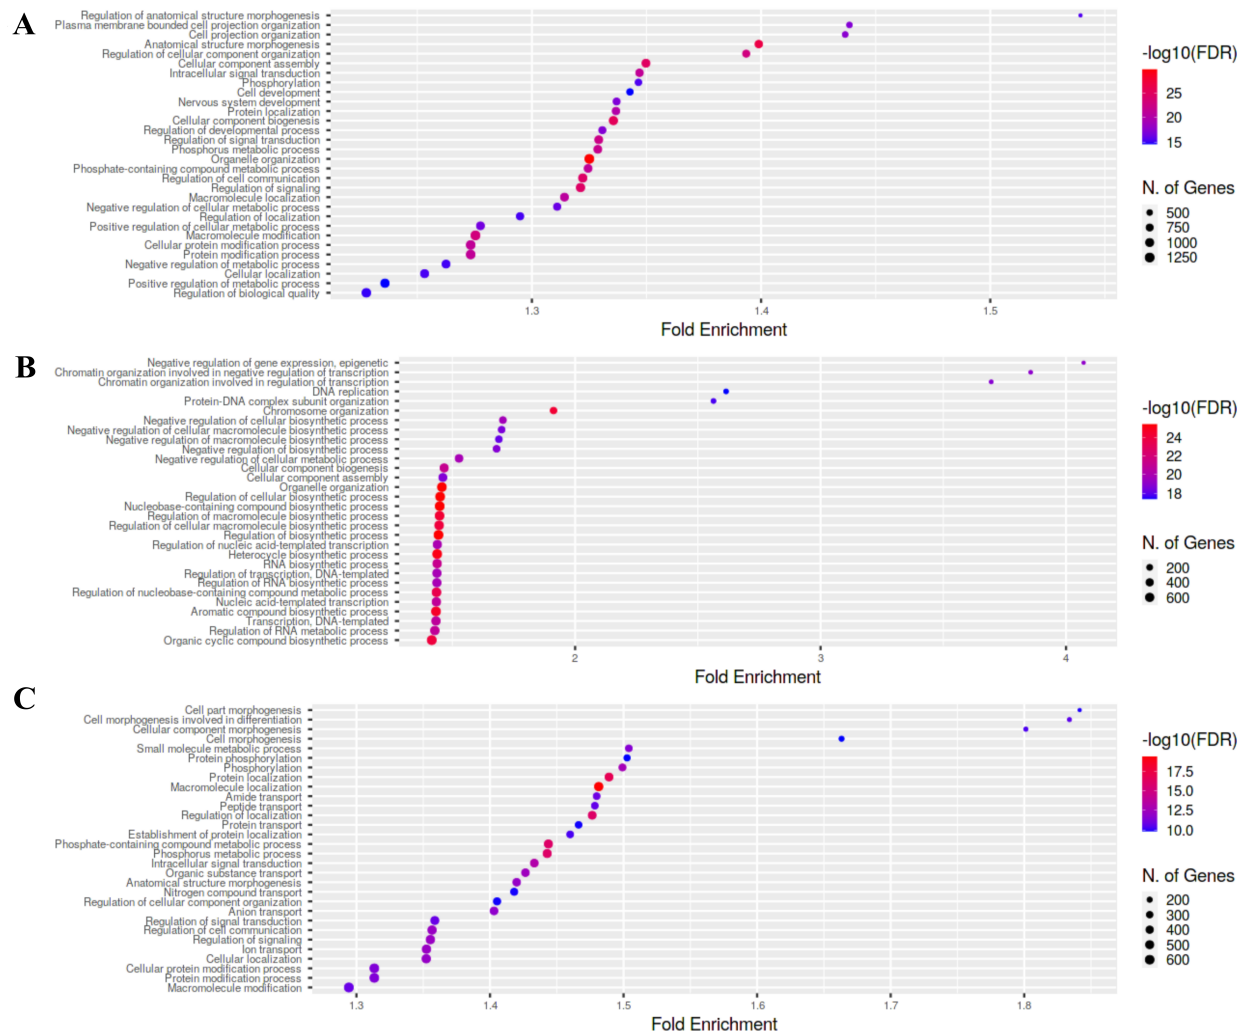

**Fig. S10. Gene ontology analysis (biological processes, BP) performed for our RNA-seq data with the ShinyGo app and the GO database.** All graphs represent ontological terms most enriched in genes, expression of which was significantly altered after *CRNDE* silencing. In all the graphs, terms are sorted according to the decreasing fold enrichment values. **A:** terms enriched in genes expression of which was both increased or decreased ( $FC \leq 0.8$  or  $FC \geq 1.2$ ) after *CRNDE* silencing; **B:** terms enriched in genes with increased expression after *CRNDE* silencing ( $FC \geq 1.2$ ); **C:** terms enriched in genes with decreased expression after *CRNDE* silencing ( $FC \leq 0.8$ ), when compared to the control cell lines.

**Table S3. Gene ontology analysis (BP) performed for our RNA-seq data with the EnrichR app and the GO database.**

**A**

| Biological process $FC \leq 0.8$ or $FC \geq 1.2$ |                                                                  |                                            |                                                 |              |
|---------------------------------------------------|------------------------------------------------------------------|--------------------------------------------|-------------------------------------------------|--------------|
| #                                                 | Ontological terms                                                | Ratio of identified genes in each category | Percentage of identified genes in each category | Adj. p-value |
| 1.                                                | extracellular matrix organization (GO:0030198)                   | 32/300                                     | 10.7%                                           | 3.48E-05     |
| 2.                                                | extracellular structure organization (GO:0043062)                | 26/216                                     | 12.0%                                           | 3.48E-05     |
| 3.                                                | external encapsulating structure organization (GO:0045229)       | 26/217                                     | 12.0%                                           | 3.48E-05     |
| 4.                                                | supramolecular fiber organization (GO:0097435)                   | 29/351                                     | 8.3%                                            | 1.04E-02     |
| 5.                                                | semaphorin-plexin signaling pathway (GO:0071526)                 | 8/35                                       | 22.9%                                           | 1.19E-02     |
| 6.                                                | negative regulation of cell adhesion (GO:0007162)                | 11/73                                      | 15.1%                                           | 1.61E-02     |
| 7.                                                | positive regulation of transcription, DNA-templated (GO:0045893) | 67/1183                                    | 5.7%                                            | 1.61E-02     |
| 8.                                                | protein localization to membrane (GO:0072657)                    | 19/195                                     | 9.7%                                            | 1.61E-02     |
| 9.                                                | positive regulation of vasculature development (GO:1904018)      | 13/102                                     | 12.7%                                           | 1.61E-02     |
| 10.                                               | negative regulation of cell-cell adhesion (GO:0022408)           | 8/41                                       | 19.5%                                           | 2.01E-02     |

**B**

| Biological process $FC \geq 1.2$ |                                                                      |                                            |                                                 |              |
|----------------------------------|----------------------------------------------------------------------|--------------------------------------------|-------------------------------------------------|--------------|
| #                                | Ontological terms                                                    | Ratio of identified genes in each category | Percentage of identified genes in each category | Adj. p-value |
| 1.                               | DNA-dependent DNA replication (GO:0006261)                           | 54/129                                     | 41.9%                                           | 4.10E-12     |
| 2.                               | double-strand break repair via homologous recombination (GO:0000724) | 41/97                                      | 42.3%                                           | 2.69E-09     |
| 3.                               | DNA replication initiation (GO:0006270)                              | 22/38                                      | 57.9%                                           | 1.51E-07     |
| 4.                               | DNA strand elongation involved in DNA replication (GO:0006271)       | 14/18                                      | 77.8%                                           | 9.19E-07     |
| 5.                               | regulation of transcription, DNA-templated (GO:0006355)              | 387/2244                                   | 17.2%                                           | 5.99E-06     |
| 6.                               | protein-DNA complex assembly (GO:0065004)                            | 45/143                                     | 31.5%                                           | 8.05E-06     |
| 7.                               | chromatin assembly (GO:0031497)                                      | 29/73                                      | 39.7%                                           | 8.57E-06     |
| 8.                               | double-strand break repair (GO:0006302)                              | 49/164                                     | 29.9%                                           | 8.94E-06     |
| 9.                               | nucleosome organization (GO:0034728)                                 | 32/94                                      | 34.0%                                           | 8.83E-05     |
| 10.                              | DNA repair (GO:0006281)                                              | 71/298                                     | 23.8%                                           | 1.56E-04     |

**C**

| Biological process $FC \leq 0.8$ |                                                                |                                            |                                                 |              |
|----------------------------------|----------------------------------------------------------------|--------------------------------------------|-------------------------------------------------|--------------|
| #                                | Ontological terms                                              | Ratio of identified genes in each category | Percentage of identified genes in each category | Adj. p-value |
| 1.                               | regulation of kinase activity (GO:0043549)                     | 31/94                                      | 33.0%                                           | 6.06E-07     |
| 2.                               | regulation of anatomical structure morphogenesis (GO:0022603)  | 36/123                                     | 29.3%                                           | 2.02E-06     |
| 3.                               | positive regulation of cellular catabolic process (GO:0031331) | 39/141                                     | 27.7%                                           | 3.61E-06     |
| 4.                               | cellular response to peptide hormone stimulus (GO:0071375)     | 31/106                                     | 29.2%                                           | 1.03E-05     |
| 5.                               | cytosolic transport (GO:0016482)                               | 33/116                                     | 28.4%                                           | 1.03E-05     |
| 6.                               | response to insulin (GO:0032868)                               | 26/84                                      | 31.0%                                           | 1.73E-05     |
| 7.                               | protein phosphorylation (GO:0006468)                           | 98/496                                     | 19.8%                                           | 2.05E-05     |
| 8.                               | regulation of actin filament-based process (GO:0032970)        | 23/73                                      | 31.5%                                           | 3.80E-05     |
| 9.                               | regulation of cytoskeleton organization (GO:0051493)           | 31/112                                     | 27.7%                                           | 3.41E-05     |
| 10.                              | response to cytokine (GO:0034097)                              | 38/150                                     | 25.3%                                           | 4.20E-05     |

Ontological terms most enriched in genes, expression of which was significantly altered after *CRNDE* silencing, are sorted according to the increasing FDR-adjusted p-value. In table **A**, terms most enriched in all differentially expressed genes (up- and downregulated) are shown; Tables **B** and **C** include terms most enriched in up-regulated genes ( $FC \geq 1.2$ ) and down-regulated genes ( $FC \leq 0.8$ ), respectively, when compared to the control cells. FC – fold change.

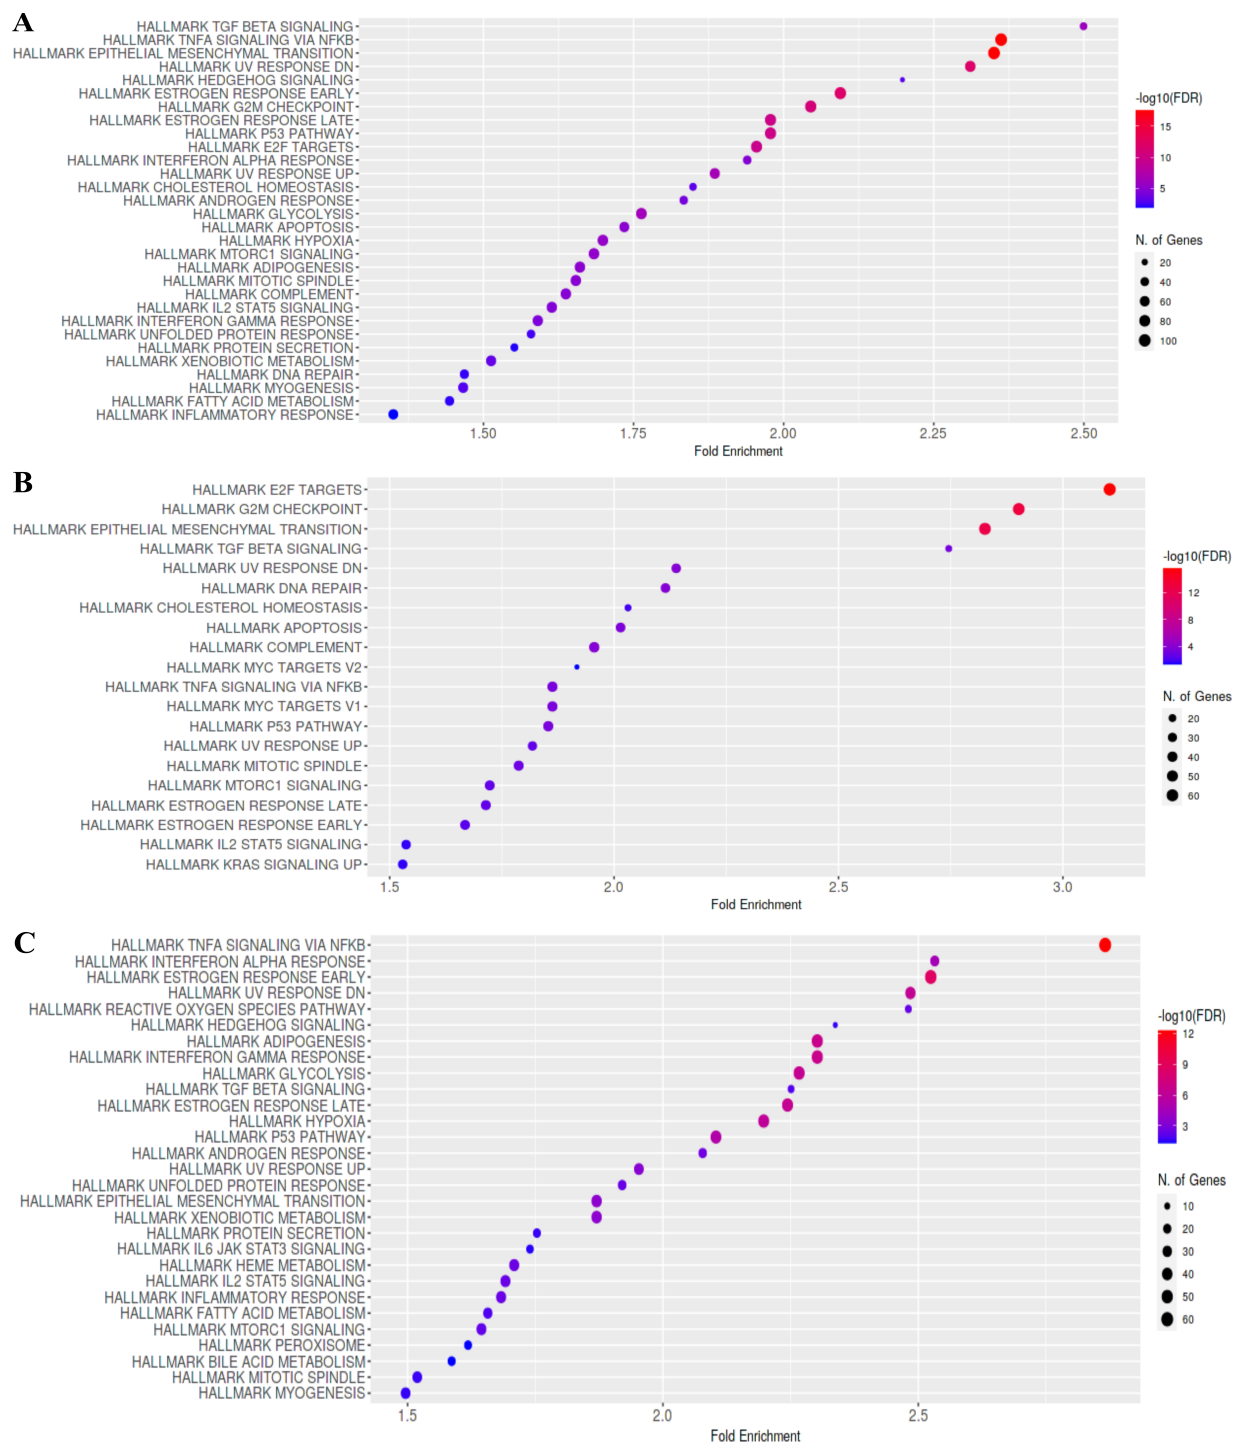

**Fig. S11. Gene ontology analysis (biological processes, BP) performed for our RNA-seq data with the ShinyGo app and the MSigDB database.** All graphs represent ontological terms most enriched in genes, expression of which was significantly altered after *CRNDE* silencing. In all the graphs, terms are sorted according to the decreasing fold enrichment values. **A:** terms enriched in genes expression of which was both increased or decreased ( $FC \leq 0.8$  or  $FC \geq 1.2$ ) after *CRNDE* silencing; **B:** terms enriched in genes with increased expression after *CRNDE* silencing ( $FC \geq 1.2$ ); **C:** terms enriched in genes with decreased expression after *CRNDE* silencing ( $FC \leq 0.8$ ), when compared to the control cell lines.

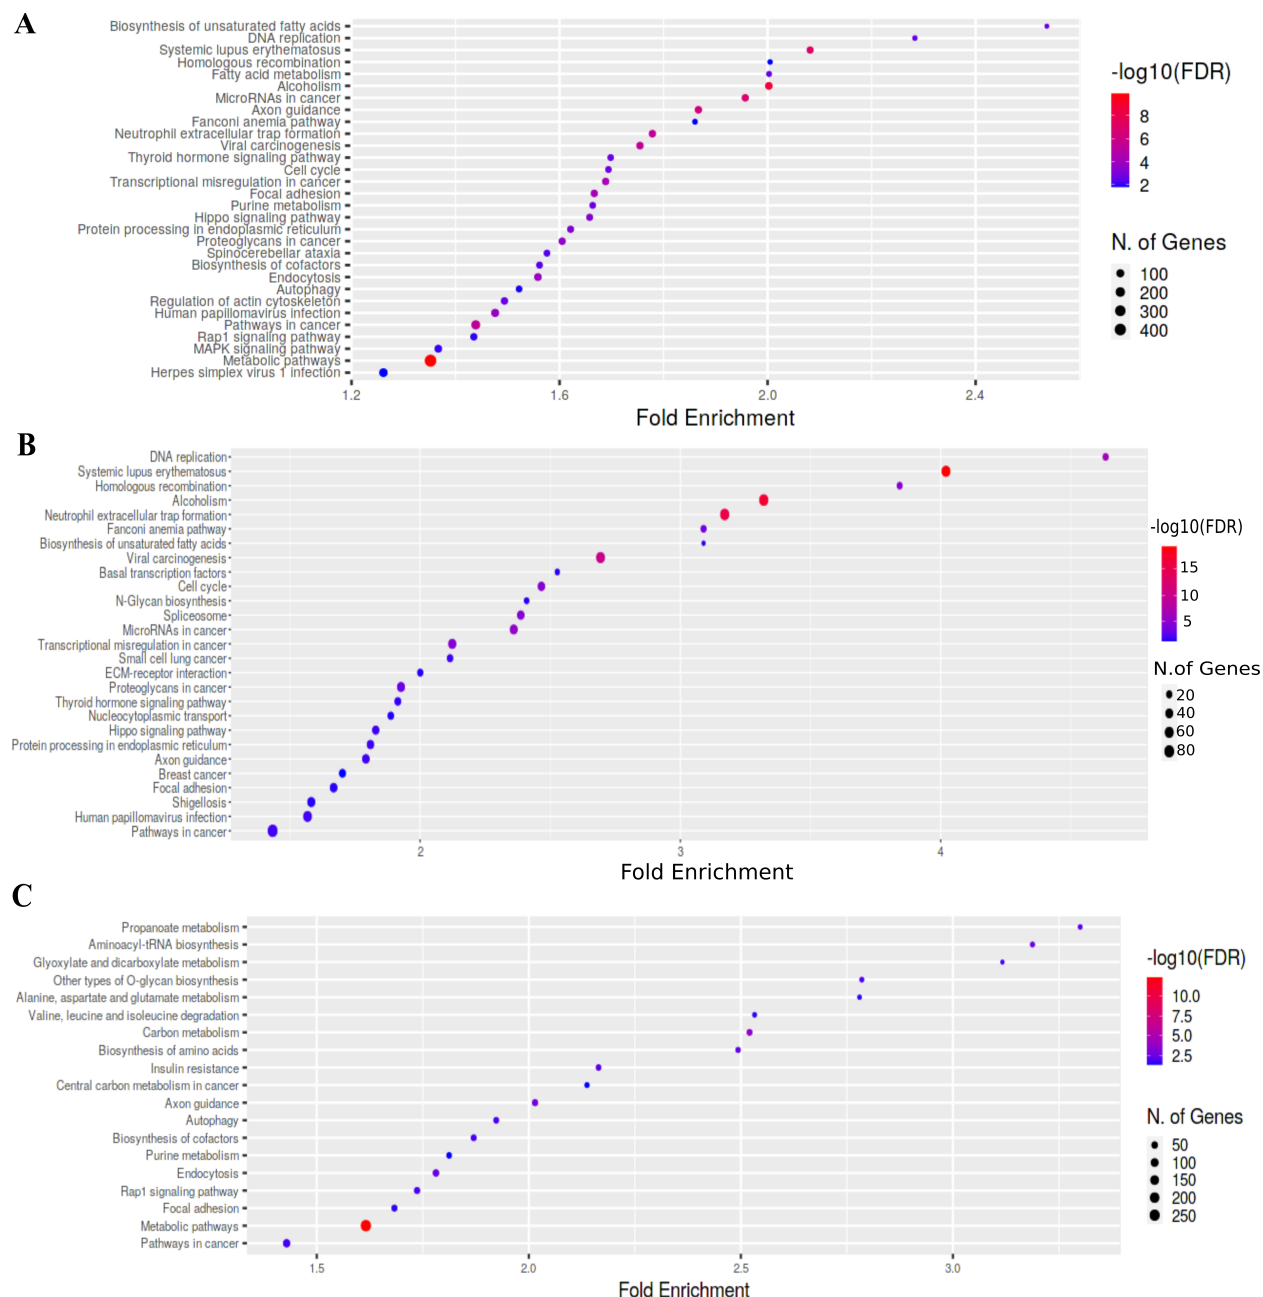

**Fig. S12. Gene ontology analysis (biological processes, BP) performed for our RNA-seq data with the ShinyGo app and the KEGG database.** All graphs represent ontological terms most enriched in genes, expression of which was significantly altered after *CRNDE* silencing. In all the graphs, terms are sorted according to the decreasing fold enrichment values. **A:** terms enriched in genes expression of which was both increased or decreased ( $FC \leq 0.8$  or  $FC \geq 1.2$ ) after *CRNDE* silencing; **B:** terms enriched in genes with increased expression after *CRNDE* silencing ( $FC \geq 1.2$ ); **C:** terms enriched in genes with decreased expression after *CRNDE* silencing ( $FC \leq 0.8$ ), when compared to the control cell lines.



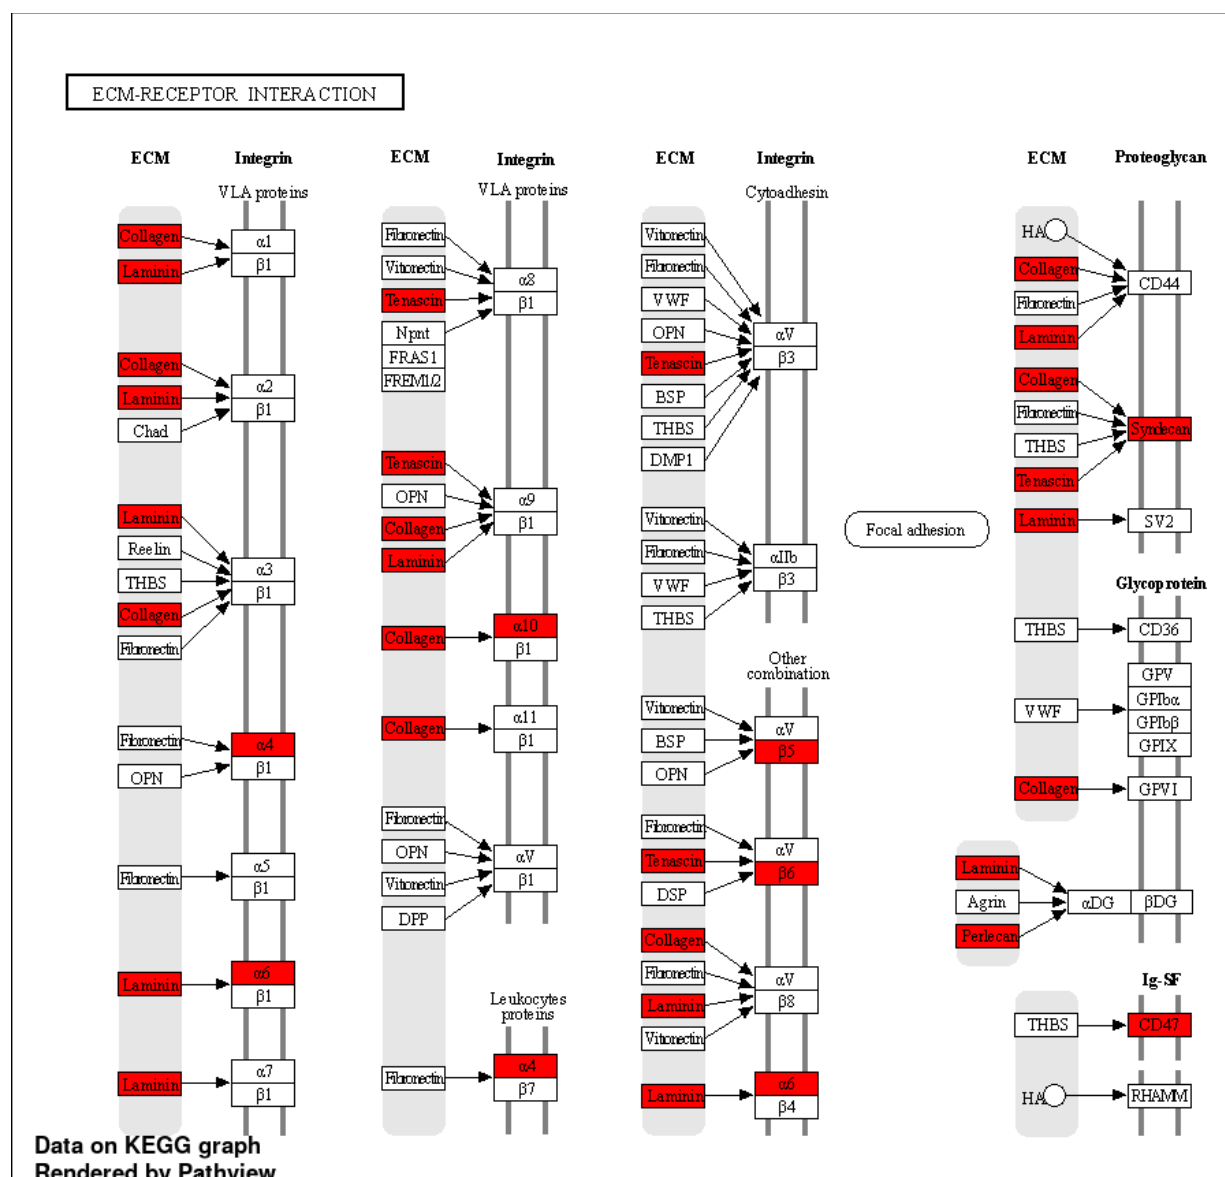

**Fig. S13. Changes in the expression of genes involved in ECM-cell receptor interactions.** Genes the expression of which was significantly increased in SK-OV-3 cells with *CRNDE* knockdown are marked red. In the analyzed gene set, there were no genes with significantly decreased expression in SK-OV-3 cells with the *CRNDE* knockdown compared to the control cells. The scheme was created in the ShinyGO app with the use of the KEGG database. ECM – extracellular matrix.

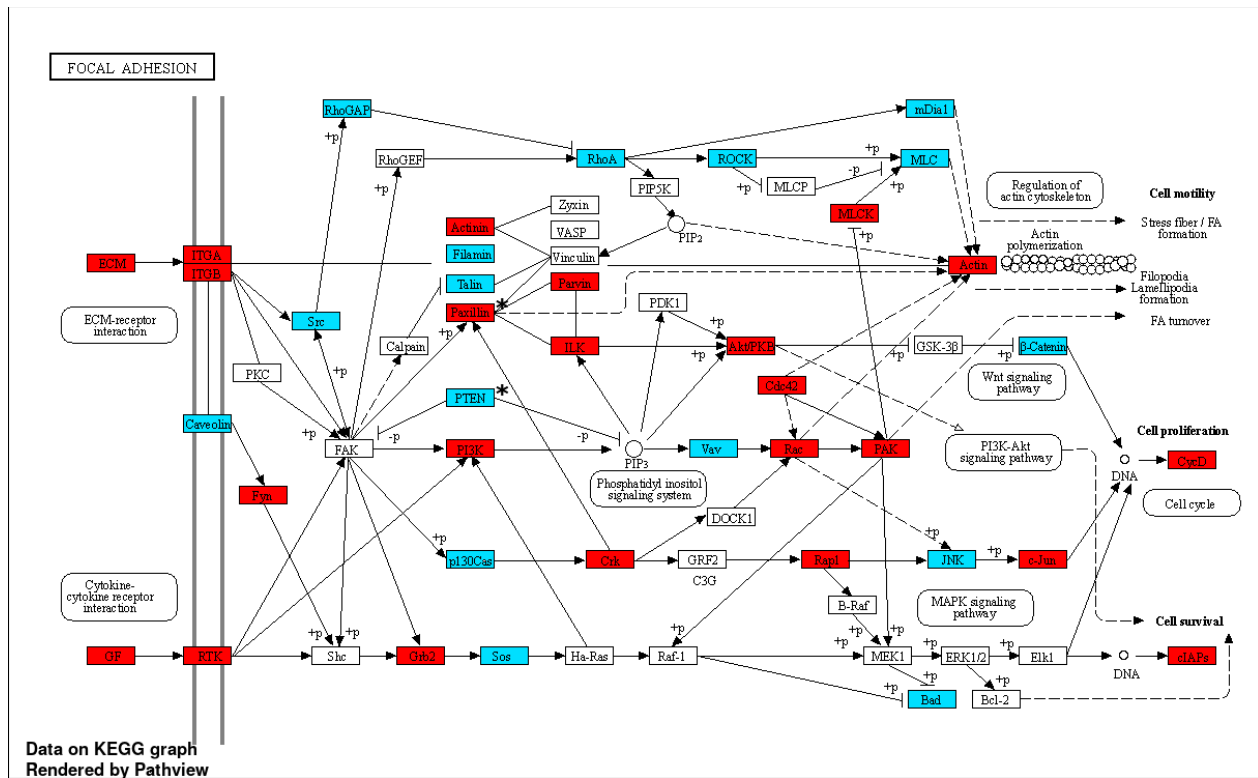

**Fig. S14. Changes in the expression of genes involved in the formation of focal adhesion plaques.** Genes the expression of which was significantly increased or decreased in SK-OV-3 cells with *CRNDE* knockdown are marked red or blue, respectively. The scheme was created in the ShinyGO app with the use of the KEGG database.

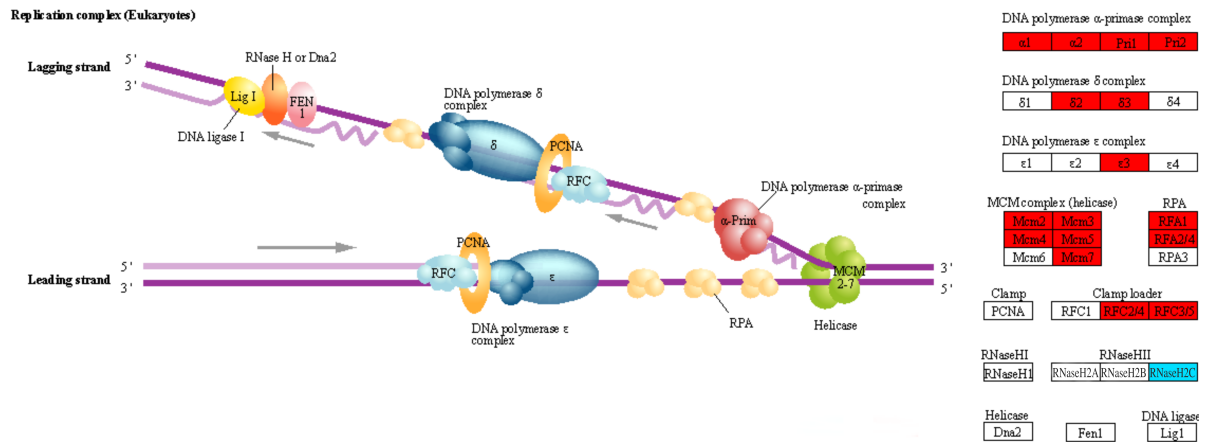

Data on KEGG graph  
Rendered by Pathview

**Fig. S15. Changes in the expression of genes involved in the regulation of DNA replication.** Genes the expression of which was significantly increased or decreased in SK-OV-3 cells with *CRNDE* knockdown are marked red or blue, respectively. The scheme was created in the ShinyGO app with the use of the KEGG database.

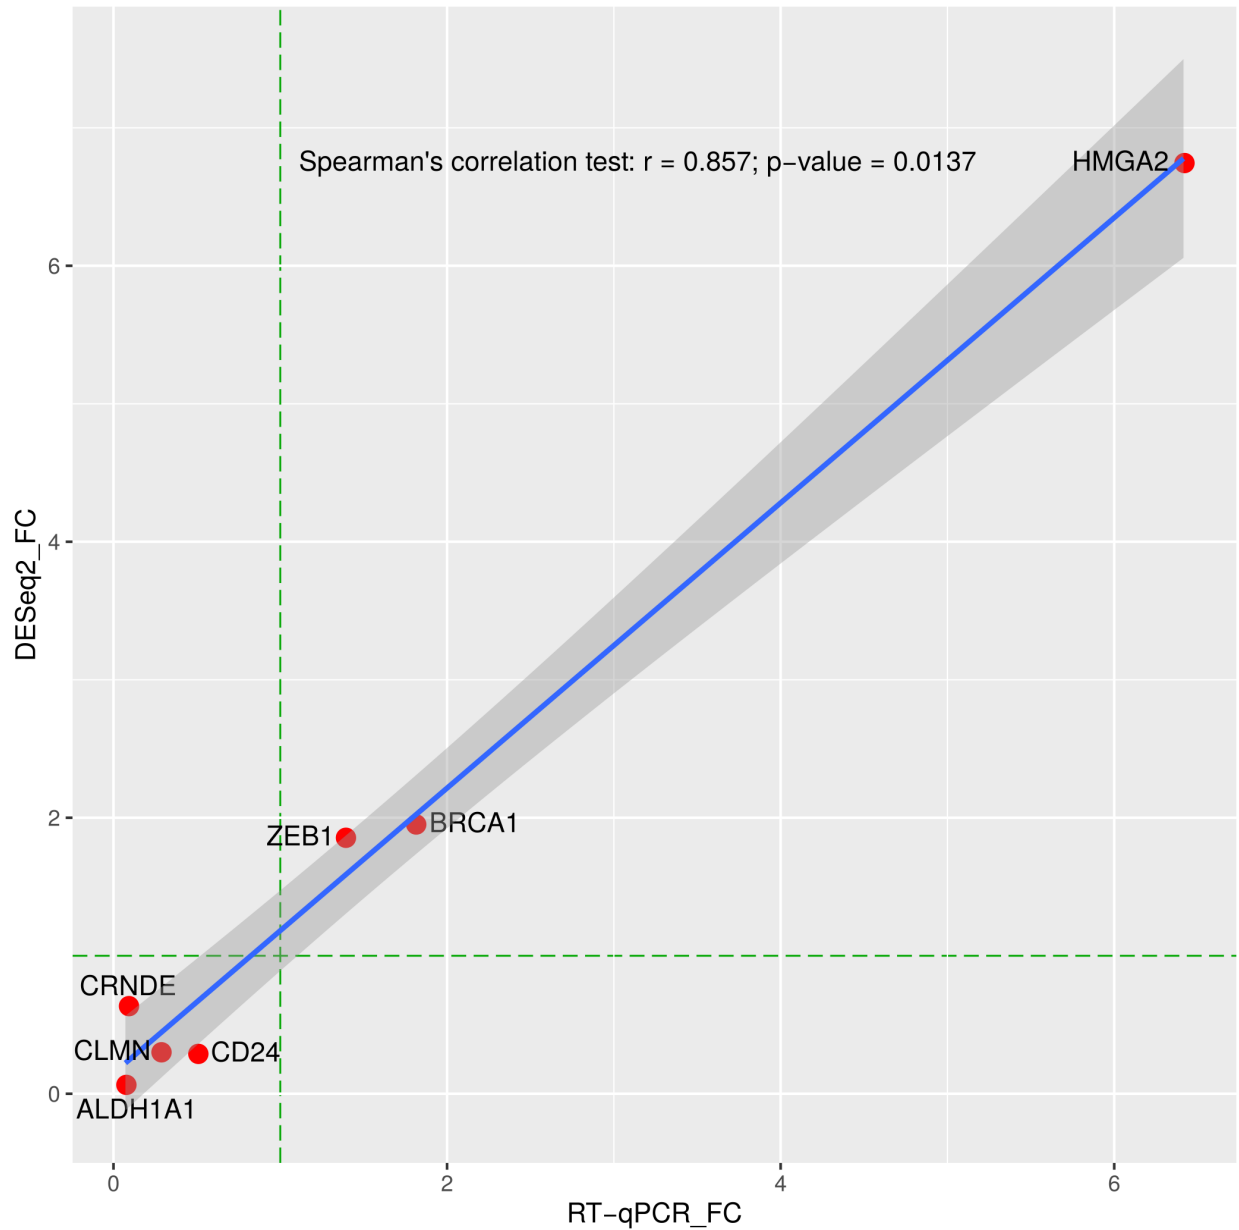

**Fig. S16. Correlation of gene expression results obtained in the NGS and RT-qPCR analyses.** The expression fold change (FC) values for seven genes, *CRNDE*, *CLMN*, *CD24*, *ALDH1A1*, *ZEB1*, *BRCA1* and *HMGA2* were compared for the RT-qPCR results (x-axis) and the NGS RNA-seq data analyzed with DESeq2 (y-axis). This comparison revealed a strong correlation between the outcomes of both techniques, proved with the Spearman's correlation test, thereby validating the computational algorithms used herein for the NGS analysis.

**Table S4. Identification of endogenous CRNDEP in one hgOvCa sample by MS.**

| Sequence                              | Mass [Da]                                                                                                                                                                                                                | Mass Δ [ppm] |
|---------------------------------------|--------------------------------------------------------------------------------------------------------------------------------------------------------------------------------------------------------------------------|--------------|
| VEMKNIQPLVFEISCDVFQSR + Oxidation (M) | 2543.200833                                                                                                                                                                                                              | -8.4         |
| YVLGIPVYRL                            | 1191.702165                                                                                                                                                                                                              | 0.5          |
| EHGKIKVLEWFK                          | 1512.840465                                                                                                                                                                                                              | -3.2         |
| YVLGIPVYR                             | 1078.621218                                                                                                                                                                                                              | 3.4          |
| IKVLEWFKYVLGIPVYR                     | 2122.239396                                                                                                                                                                                                              | 2.4          |
| EDKEDATGNVEMK                         | 1464.633076                                                                                                                                                                                                              | -4.9         |
| Full sequence coverage                | MLAEIHPKAG      LQS <b><i>LQFIMEL</i></b> <b><i>LYWLLEGGDS</i></b><br><b><i>EDKEDATGNV</i></b> <b><i>EMKNIQPLVF</i></b> <b><i>EISCDVFQSR</i></b><br><b><i>CKEHGKIKVL</i></b> <b><i>EWFKYVLGIP</i></b> <b><i>VYRL</i></b> |              |

CRNDEP amino acids identified herein by MS are denoted with green letters. Those identified in the study by Chothani et al. [6] based on Ribo-seq data are written in bold and italics, while the oligopeptide confirmed in their MS/MS analysis is underlined. The region matching a synthetic epitope that we used to develop the anti-CRNDEP antibody is highlighted in yellow; hgOvCa – high-grade ovarian carcinoma.

**Table S5. A joined list of CRNDEP protein partners identified by mass spectrometry.**

| #  | Protein ID     | Protein name                                                                      | Gene name       | CRNDEP fused with Strep-Flag |              | CRNDEP (endogenous) |          |
|----|----------------|-----------------------------------------------------------------------------------|-----------------|------------------------------|--------------|---------------------|----------|
|    |                |                                                                                   |                 | Peptides                     | Coverage     | Peptides            | Coverage |
| 1  | O43663         | Protein regulator of cytokinesis 1                                                | <i>PRC1</i>     | 14                           | 25.32        | 14                  | 28.87    |
| 2  | Q5SW79         | Centrosomal protein of 170 kDa                                                    | <i>CEP170</i>   | 13                           | 12.75        | 11                  | 9.85     |
| 3  | P01024         | Complement C3                                                                     | <i>C3</i>       | 9                            | 5.05         | 13                  | 7.16     |
| 4  | Q96S11         | BTB/POZ domain-containing protein KCTD15                                          | <i>KCTD15</i>   | 8                            | 31.8         | 13                  | 51.94    |
| 5  | P26196         | Probable ATP-dependent RNA helicase DDX6                                          | <i>DDX6</i>     | 7                            | 25.26        | 7                   | 28.78    |
| 6  | Q15717         | ELAV-like protein 1                                                               | <i>ELAVL1</i>   | 4                            | 14.42        | 6                   | 22.39    |
| 7  | P0C0L4         | Complement C4-A, Complement C4-B                                                  | <i>C4A, C4B</i> | 3                            | 2.24         | 6                   | 4.01     |
| 8  | Q9NZB2         | Constitutive activator of PPAR-gamma-like protein 1                               | <i>FAM120A</i>  | 3                            | 3.76         | 6                   | 7.96     |
| 9  | P16989         | Y-box-binding protein 3                                                           | <i>YBX3</i>     | 2                            | 8.06         | 4                   | 23.12    |
| 10 | O00425         | Insulin-like growth factor 2 mRNA-binding protein 3                               | <i>IGF2BP3</i>  | 2                            | 3.97         | 4                   | 8.98     |
| 11 | Q12905         | Interleukin enhancer-binding factor 2                                             | <i>ILF2</i>     | 3                            | 10.51        | 3                   | 10.51    |
| 12 | O00410         | Importin-5                                                                        | <i>IPO5</i>     | 3                            | 3.28         | 2                   | 3.01     |
| 13 | Q719H9         | BTB/POZ domain-containing protein KCTD1                                           | <i>KCTD1</i>    | 2                            | 8.56         | 3                   | 8.56     |
| 14 | Q12830         | Nucleosome-remodeling factor subunit BPTF                                         | <i>BPTF</i>     | 2                            | 1.12         | 2                   | 0.66     |
| 15 | <b>B8Y2T7</b>  | <b>HCG1815491 (CRNDEP)</b>                                                        | <b>CRNDE</b>    | <b>4</b>                     | <b>27.38</b> |                     |          |
| 16 | P61978         | Heterogeneous nuclear ribonucleoprotein K                                         | <i>HNRNPK</i>   | 13                           | 43.2         |                     |          |
| 17 | P52209         | 6-phosphogluconate dehydrogenase, decarboxylating                                 | <i>PGD</i>      | 4                            | 12.22        |                     |          |
| 18 | P11586         | C-1-tetrahydrofolate synthase, cytoplasmic                                        | <i>MTHFD1</i>   | 5                            | 9.3          |                     |          |
| 19 | Q99729         | Heterogeneous nuclear ribonucleoprotein A/B                                       | <i>HNRNPAB</i>  | 6                            | 21.39        |                     |          |
| 20 | P01889         | HLA class I histocompatibility antigen                                            | <i>HLA-B</i>    | 2                            | 7.46         |                     |          |
| 21 | P09914         | Interferon-induced protein with tetratricopeptide repeats 1                       | <i>IFIT1</i>    | 3                            | 9.83         |                     |          |
| 22 | P35221         | Catenin alpha-1                                                                   | <i>CTNNA1</i>   | 3                            | 7.95         |                     |          |
| 23 | Q9C005         | Protein dpy-30 homolog                                                            | <i>DPY30</i>    | 2                            | 36.36        |                     |          |
| 24 | P08865         | 40S ribosomal protein SA                                                          | <i>RPSA</i>     | 2                            | 13.56        |                     |          |
| 25 | Q13813         | Spectrin alpha chain, non-erythrocytic 1                                          | <i>SPTAN1</i>   | 3                            | 2.1          |                     |          |
| 26 | P23528         | Cofilin-1                                                                         | <i>CFL1</i>     | 2                            | 16.87        |                     |          |
| 27 | Q9Y281         | Cofilin-2                                                                         | <i>CFL2</i>     | 2                            | 16.87        |                     |          |
| 28 | P55072         | Transitional endoplasmic reticulum ATPase                                         | <i>VCP</i>      | 7                            | 13.52        |                     |          |
| 29 | Q01082         | Spectrin beta chain, non-erythrocytic 1                                           | <i>SPTBN1</i>   | 2                            | 1.06         |                     |          |
| 30 | Q08J23         | tRNA (cytosine(34)-C(5))-methyltransferase                                        | <i>NSUN2</i>    | 3                            | 7.43         |                     |          |
| 31 | P31150         | Rab GDP dissociation inhibitor alpha                                              | <i>GDI1</i>     | 2                            | 7.16         |                     |          |
| 32 | P27824         | Calnexin                                                                          | <i>CANX</i>     | 2                            | 5.74         |                     |          |
| 33 | P33240         | Cleavage stimulation factor subunit 2                                             | <i>CSTF2</i>    | 3                            | 11.09        |                     |          |
| 34 | Q8TEX9         | Importin-4                                                                        | <i>IPO4</i>     | 2                            | 2.04         |                     |          |
| 35 | P78371         | T-complex protein 1 subunit beta                                                  | <i>CCT2</i>     | 2                            | 4.49         |                     |          |
| 36 | P27695         | DNA-(apurinic or apyrimidinic site) lyase                                         | <i>APEX1</i>    | 2                            | 8.49         |                     |          |
| 37 | P30153         | Serine/threonine-protein phosphatase 2A 65 kDa regulatory subunit A alpha isoform | <i>PPP2R1A</i>  | 4                            | 10.7         |                     |          |
| 38 | P61604         | 10 kDa heat shock protein, mitochondrial                                          | <i>HSPE1</i>    | 2                            | 21.57        |                     |          |
| 39 | Q92616         | eIF-2-alpha kinase activator GCN1                                                 | <i>GCN1</i>     | 2                            | 1.2          |                     |          |
| 40 | Q01813         | ATP-dependent 6-phosphofructokinase, platelet type                                | <i>PFKP</i>     | 2                            | 2.81         |                     |          |
| 41 | P49368         | T-complex protein 1 subunit gamma                                                 | <i>CCT3</i>     | 3                            | 11.01        |                     |          |
| 42 | P22392         | Nucleoside diphosphate kinase B                                                   | <i>NME2</i>     | 2                            | 21.05        |                     |          |
| 43 | O00148, Q13838 | ATP-dependent RNA helicase DDX39A, Spliceosome RNA helicase DDX39B                | <i>DDX39A</i>   | 2                            | 4.68         |                     |          |
| 44 | P14324         | Farnesyl pyrophosphate synthase                                                   | <i>FDPS</i>     | 2                            | 7.16         |                     |          |
| 45 | P60174         | Triosephosphate isomerase                                                         | <i>TPI1</i>     | 3                            | 19.93        |                     |          |
| 46 | P15531         | Nucleoside diphosphate kinase A                                                   | <i>NME1</i>     | 2                            | 17.76        |                     |          |
| 47 | P35232         | Prohibitin                                                                        | <i>PHB</i>      | 4                            | 20.96        |                     |          |
| 48 | Q9Y310         | tRNA-splicing ligase RtcB homolog                                                 | <i>RTCB</i>     | 3                            | 7.52         |                     |          |
| 49 | Q07065         | Cytoskeleton-associated protein 4                                                 | <i>CKAP4</i>    | 3                            | 6.48         |                     |          |
| 50 | Q92499         | ATP-dependent RNA helicase DDX1                                                   | <i>DDX1</i>     | 2                            | 5.0          |                     |          |
| 51 | P17987         | T-complex protein 1 subunit alpha                                                 | <i>TCP1</i>     | 2                            | 3.78         |                     |          |
| 52 | P00403         | Cytochrome c oxidase subunit 2                                                    | <i>MT-CO2</i>   | 2                            | 13.22        |                     |          |
| 53 | Q9Y6C9         | Mitochondrial carrier homolog 2                                                   | <i>MTCH2</i>    | 2                            | 7.26         |                     |          |
| 54 | P30041         | Peroxiredoxin-6                                                                   | <i>PRDX6</i>    | 2                            | 8.93         |                     |          |
| 55 | P31930         | Cytochrome b-c1 complex subunit 1, mitochondrial                                  | <i>UQCRC1</i>   | 2                            | 6.46         |                     |          |
| 56 | Q7L2E3         | Putative ATP-dependent RNA helicase DHX30                                         | <i>DHX30</i>    | 2                            | 2.93         |                     |          |
| 57 | P14618         | Pyruvate kinase PKM                                                               | <i>PKM</i>      | 6                            | 15.25        |                     |          |
| 58 | Q09028         | Histone-binding protein RBBP4                                                     | <i>RBBP4</i>    | 2                            | 8.0          |                     |          |
| 59 | P02786         | Transferrin receptor protein 1                                                    | <i>TFRC</i>     | 3                            | 5.26         |                     |          |
| 60 | P22234         | Multifunctional protein ADE2                                                      | <i>PAICS</i>    | 4                            | 11.29        |                     |          |
| 61 | P08195         | 4F2 cell-surface antigen heavy chain                                              | <i>SLC3A2</i>   | 5                            | 9.68         |                     |          |
| 62 | P51648         | Fatty aldehyde dehydrogenase                                                      | <i>ALDH3A2</i>  | 2                            | 4.54         |                     |          |

|     |               |                                                                                                            |                      |   |       |    |       |
|-----|---------------|------------------------------------------------------------------------------------------------------------|----------------------|---|-------|----|-------|
| 63  | Q13501        | Sequestosome-1                                                                                             | <i>SQSTM1</i>        | 3 | 10.23 |    |       |
| 64  | P36871        | Phosphoglucosyltransferase-1                                                                               | <i>PGM1</i>          | 2 | 4.09  |    |       |
| 65  | Q8VWM7        | Ataxin-2-like protein                                                                                      | <i>ATXN2L</i>        | 2 | 2.42  |    |       |
| 66  | Q9NR12        | PDZ and LIM domain protein 7                                                                               | <i>PDLIM7</i>        | 5 | 14.0  |    |       |
| 67  | P19474        | E3 ubiquitin-protein ligase TRIM21                                                                         | <i>TRIM21</i>        | 2 | 5.89  |    |       |
| 68  | Q13263        | Transcription intermediary factor 1-beta                                                                   | <i>TRIM28</i>        | 4 | 5.03  |    |       |
| 69  | P30101        | Protein disulfide-isomerase A3                                                                             | <i>PDIA3</i>         | 4 | 11.88 |    |       |
| 70  | P41250        | Glycine--tRNA ligase                                                                                       | <i>GARS</i>          | 2 | 2.44  |    |       |
| 71  | P12268        | Inosine-5'-monophosphate dehydrogenase 2                                                                   | <i>IMPDH2</i>        | 2 | 5.84  |    |       |
| 72  | P56134        | ATP synthase subunit f, mitochondrial                                                                      | <i>ATP5J2</i>        | 2 | 25.53 |    |       |
| 73  | Q9UN86        | Ras GTPase-activating protein-binding protein 2                                                            | <i>G3BP2</i>         | 2 | 5.19  |    |       |
| 74  | Q9NZM1        | Myoferlin                                                                                                  | <i>MYOF</i>          | 2 | 0.97  |    |       |
| 75  | P12277        | Creatine kinase B-type                                                                                     | <i>CKB</i>           | 4 | 20.21 |    |       |
| 76  | Q9NX20        | 39S ribosomal protein L16, mitochondrial                                                                   | <i>MRPL16</i>        | 2 | 10.36 |    |       |
| 77  | P31939        | Bifunctional purine biosynthesis protein PURH                                                              | <i>ATIC</i>          | 2 | 4.39  |    |       |
| 78  | P14868        | Aspartate--tRNA ligase, cytoplasmic                                                                        | <i>DARS</i>          | 2 | 3.99  |    |       |
| 79  | Q14204        | Cytoplasmic dynein 1 heavy chain 1                                                                         | <i>DYNC1H1</i>       | 5 | 1.68  |    |       |
| 80  | Q7Z417        | Nuclear fragile X mental retardation-interacting protein 2                                                 | <i>NUFIP2</i>        | 2 | 3.17  |    |       |
| 81  | Q96HC4        | PDZ and LIM domain protein 5                                                                               | <i>PDLIM5</i>        | 2 | 4.03  |    |       |
| 82  | Q95373        | Importin-7                                                                                                 | <i>IPO7</i>          | 2 | 2.99  |    |       |
| 83  | Q14980        | Exportin-1                                                                                                 | <i>XPO1</i>          | 3 | 4.67  |    |       |
| 84  | P62633        | Cellular nucleic acid-binding protein                                                                      | <i>CNBP</i>          | 2 | 10.17 |    |       |
| 85  | P19623        | Spermidine synthase                                                                                        | <i>SRM</i>           | 2 | 11.26 |    |       |
| 86  | P30040        | Endoplasmic reticulum resident protein 29                                                                  | <i>ERP29</i>         | 2 | 13.79 |    |       |
| 87  | P07814        | Bifunctional glutamate/proline--tRNA ligase                                                                | <i>EPRS</i>          | 4 | 4.03  |    |       |
| 88  | P14923        | Junction plakoglobin                                                                                       | <i>JUP</i>           |   |       | 2  | 3.89  |
| 89  | P07910        | Heterogeneous nuclear ribonucleoproteins C1/C2                                                             | <i>HNRNPC</i>        |   |       | 9  | 28.1  |
| 90  | Q96PK6        | RNA-binding protein 14                                                                                     | <i>RBM14</i>         |   |       | 10 | 18.24 |
| 91  | P42167,P42166 | Lamina-associated polypeptide 2, isoforms beta/gamma, Lamina-associated polypeptide 2, isoform alpha       | <i>TMPO</i>          |   |       | 3  | 12.78 |
| 92  | P50993,P13637 | Sodium/potassium-transporting ATPase subunit alpha-2, Sodium/potassium-transporting ATPase subunit alpha-3 | <i>ATP1A2,ATP1A3</i> |   |       | 2  | 3.04  |
| 93  | P48643        | T-complex protein 1 subunit epsilon                                                                        | <i>CCT5</i>          |   |       | 3  | 9.24  |
| 94  | Q13435        | Splicing factor 3B subunit 2                                                                               | <i>SF3B2</i>         |   |       | 3  | 3.91  |
| 95  | P27797        | Calreticulin                                                                                               | <i>CALR</i>          |   |       | 2  | 14.39 |
| 96  | P22087        | rRNA 2'-O-methyltransferase fibrillarin                                                                    | <i>FBL</i>           |   |       | 2  | 11.84 |
| 97  | Q8WUM4        | Programmed cell death 6-interacting protein                                                                | <i>PDCD6IP</i>       |   |       | 2  | 4.95  |
| 98  | Q96E39        | RNA binding motif protein, X-linked-like-1                                                                 | <i>RBMXL1</i>        |   |       | 2  | 6.92  |
| 99  | P62888        | 60S ribosomal protein L30                                                                                  | <i>RPL30</i>         |   |       | 3  | 29.57 |
| 100 | Q14847        | LIM and SH3 domain protein 1                                                                               | <i>LASP1</i>         |   |       | 2  | 10.34 |
| 101 | Q9NZI8        | Insulin-like growth factor 2 mRNA-binding protein 1                                                        | <i>IGF2BP1</i>       |   |       | 3  | 6.93  |
| 102 | P19338        | Nucleolin                                                                                                  | <i>NCL</i>           |   |       | 3  | 4.65  |
| 103 | Q9Y597        | BTB/POZ domain-containing protein KCTD3                                                                    | <i>KCTD3</i>         |   |       | 2  | 5.03  |
| 104 | Q14CN4        | Keratin, type II cytoskeletal 72                                                                           | <i>KRT72</i>         |   |       | 2  | 2.35  |
| 105 | O00231        | 26S proteasome non-ATPase regulatory subunit 11                                                            | <i>PSMD11</i>        |   |       | 2  | 5.69  |
| 106 | P07358        | Complement component C8 beta chain                                                                         | <i>C8B</i>           |   |       | 2  | 5.08  |
| 107 | P61088        | Ubiquitin-conjugating enzyme E2 N                                                                          | <i>UBE2N</i>         |   |       | 2  | 20.39 |
| 108 | Q9UKM9        | RNA-binding protein Raly                                                                                   | <i>RALY</i>          |   |       | 5  | 18.95 |
| 109 | Q08554        | Desmocollin-1                                                                                              | <i>DSC1</i>          |   |       | 3  | 5.37  |
| 110 | Q6VMQ6        | Activating transcription factor 7-interacting protein 1                                                    | <i>ATF7IP</i>        |   |       | 2  | 3.54  |
| 111 | Q6P1L8        | 39S ribosomal protein L14, mitochondrial                                                                   | <i>MRPL14</i>        |   |       | 3  | 13.79 |
| 112 | P13804        | Electron transfer flavoprotein subunit alpha, mitochondrial                                                | <i>ETFA</i>          |   |       | 2  | 10.21 |
| 113 | P0DI83        | Ras-related protein Rab-34, isoform NARR                                                                   | <i>RAB34</i>         |   |       | 2  | 18.18 |
| 114 | P45974        | Ubiquitin carboxyl-terminal hydrolase 5                                                                    | <i>USP5</i>          |   |       | 2  | 3.61  |
| 115 | Q95613        | Pericentrin                                                                                                | <i>PCNT</i>          |   |       | 4  | 1.47  |
| 116 | P53992        | Protein transport protein Sec24C                                                                           | <i>SEC24C</i>        |   |       | 2  | 3.11  |
| 117 | Q08043        | Alpha-actinin-3                                                                                            | <i>ACTN3</i>         |   |       | 2  | 2.89  |
| 118 | O75367        | Core histone macro-H2A.1                                                                                   | <i>H2AFY</i>         |   |       | 2  | 8.33  |
| 119 | P54136        | Arginine--tRNA ligase, cytoplasmic                                                                         | <i>RARS</i>          |   |       | 2  | 3.48  |
| 120 | P54886        | Delta-1-pyrroline-5-carboxylate synthase                                                                   | <i>ALDH18A1</i>      |   |       | 2  | 2.52  |
| 121 | P60953        | Cell division control protein 42 homolog                                                                   | <i>CDC42</i>         |   |       | 2  | 14.66 |
| 122 | Q4VC31        | Coiled-coil domain-containing protein 58                                                                   | <i>CCDC58</i>        |   |       | 2  | 18.06 |

Proteins detected as interactants of both the CRNDEP-Strep-Flag fusion protein and the endogenous CRNDEP micropeptide are highlighted in yellow. The CRNDEP micropeptide is marked red.

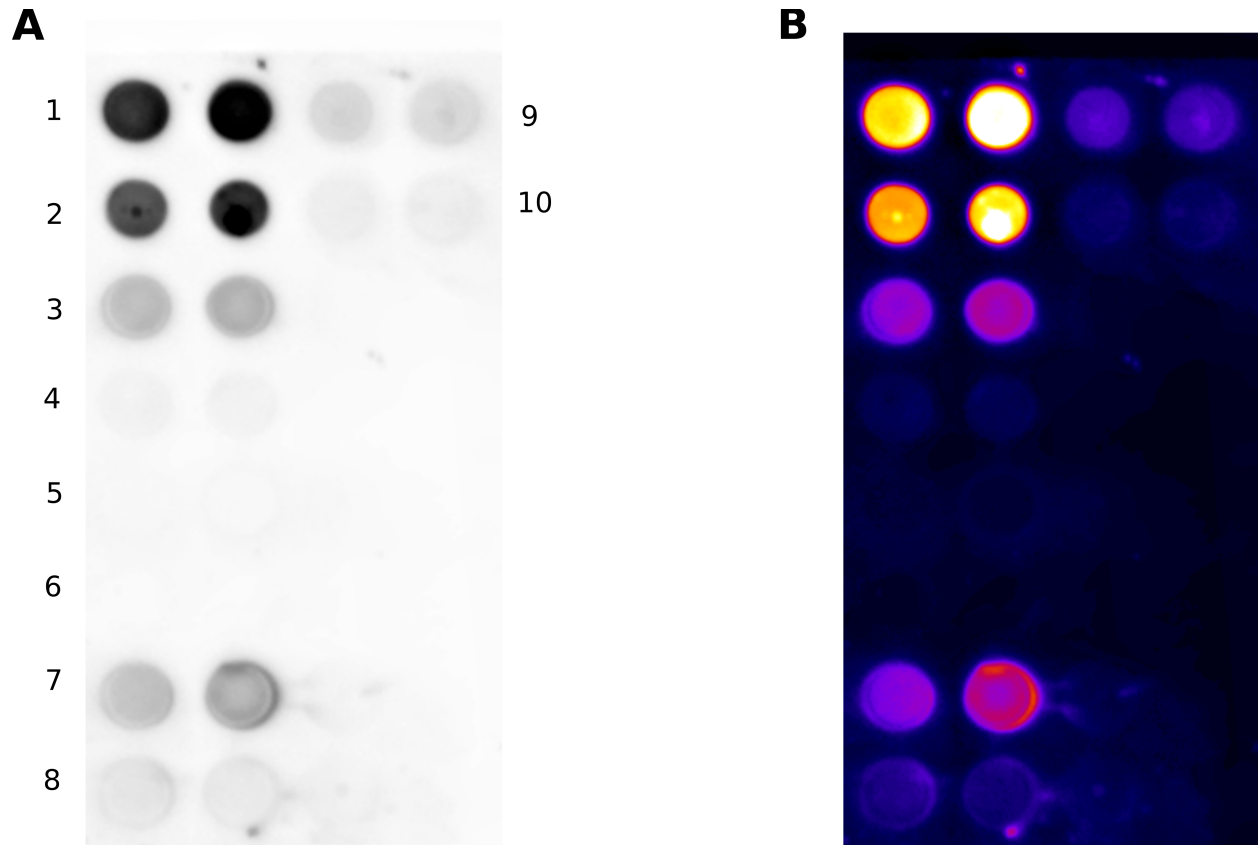

**Fig. S17. Dot-blot analysis of CRNDEP sensitivity to different physico-chemical factors.** 10  $\mu$ g of the total protein lysate obtained from a single hgOvCa sample were added to each well. The experiment was performed on a nitrocellulose membrane. A: original dot blot result, B: a heatmap representation of the dot blot, generated by the ImageJ app. 1: lysate + H<sub>2</sub>O (ctrl); 2: lysate + H<sub>2</sub>O heated to 100 °C (5 min); 3: lysate + 10mM DTT; 4: lysate + 10mM DTT heated to 100 °C (5 min); 5: lysate + 1x Laemmli buffer; 6: lysate + 1x Laemmli buffer heated to 100 °C (5 min); 7: lysate + 1% SDS; 8: lysate + 1% SDS heated to 100 °C (5 min); 9: lysate + 2% SDS; 10: lysate + 2% SDS heated to 100 °C (5 min). Each experimental variant was carried out in two horizontally oriented technical replications.



**Table S6. Ontology analysis (cellular components, CC) for CRNDEP protein interactants found herein.**

| #  | Cellular component - Ontological terms                                            | Ratio of identified proteins in each category | p-value | Adjusted p-value | Identified proteins                                                                |
|----|-----------------------------------------------------------------------------------|-----------------------------------------------|---------|------------------|------------------------------------------------------------------------------------|
| 1  | cytoplasmic stress granule (GO:0010494)                                           | 5/41                                          | 8.2E-07 | 1.071E-04        | ATXN2L; PABPC4; DDX6; NUFIP2; DDX1                                                 |
| 2  | cytoplasmic ribonucleoprotein granule (GO:0036464)                                | 7/170                                         | 8.0E-06 | 5.246E-04        | ATXN2L; DDX6; NUFIP2; PABPC4; DDX1; SQSTM1; CKAP4                                  |
| 3  | chaperonin-containing T-complex (GO:0005832)                                      | 3/13                                          | 2.1E-05 | 8.972E-04        | CCT3; CCT2; TCP1                                                                   |
| 4  | secretory granule lumen (GO:0034774)                                              | 8/317                                         | 6.1E-05 | 1.993E-03        | CCT2; DYNC1H1; VCP; PKM; IMPDH2; SPTAN1; ILF2; PRDX6                               |
| 5  | focal adhesion (GO:0005925)                                                       | 8/356                                         | 1.4E-04 | 3.565E-03        | YWHAE; PDIA3; HNRNP; CFL1; CTNNA1; EZR; YWHAG; PDLIM7                              |
| 6  | filicolin-1-rich granule lumen (GO:1904813)                                       | 5/123                                         | 1.8E-04 | 3.920E-03        | VCP; PKM; IMPDH2; ILF2; PGMI                                                       |
| 7  | microtubule cytoskeleton (GO:0015630)                                             | 8/388                                         | 2.4E-04 | 4.403E-03        | CCT3; CCT2; DYNC1H1; PPP2R1A; PRC1; TCP1; SPTAN1; TUBA4A                           |
| 8  | microtubule (GO:0005874)                                                          | 6/210                                         | 2.7E-04 | 4.403E-03        | CCT3; CCT2; DYNC1H1; PRC1; TCP1; TUBA4A                                            |
| 9  | polymeric cytoskeletal fiber (GO:0099513)                                         | 6/221                                         | 3.6E-04 | 4.403E-03        | CCT3; CCT2; DYNC1H1; TCP1; EZR; TUBA4A                                             |
| 10 | cytoskeleton (GO:0005856)                                                         | 9/520                                         | 3.6E-04 | 4.403E-03        | CCT3; PPP2R1A; EZR; PDLIM5; SPTAN1; PGMI; TUBA4A; PDLIM7; SPTBN1                   |
| 11 | NURE complex (GO:0016589)                                                         | 2/7                                           | 3.7E-04 | 4.403E-03        | RBBP4; BPTF                                                                        |
| 12 | azurophil granule (GO:0042582)                                                    | 5/154                                         | 5.1E-04 | 5.533E-03        | CCT2; DYNC1H1; VCP; PRDX6; CKAP4                                                   |
| 13 | azurophil granule lumen (GO:0035578)                                              | 4/90                                          | 5.9E-04 | 5.924E-03        | CCT2; DYNC1H1; VCP; PRDX6                                                          |
| 14 | ISWI-type complex (GO:0031010)                                                    | 2/11                                          | 9.6E-04 | 8.961E-03        | RBBP4; BPTF                                                                        |
| 15 | filicolin-1-rich granule (GO:0101002)                                             | 5/184                                         | 1.1E-03 | 9.312E-03        | VCP; PKM; IMPDH2; ILF2; PGMI                                                       |
| 16 | histone methyltransferase complex (GO:0035097)                                    | 3/49                                          | 1.2E-03 | 9.312E-03        | RBBP4; DPY30; BPTF                                                                 |
| 17 | nuclear body (GO:0016604)                                                         | 9/618                                         | 1.2E-03 | 9.312E-03        | DDX17; ATXN2L; DDX39A; NUFIP2; DDX1; APEX1; CSTF2; SQSTM1; CKAP4                   |
| 18 | mitochondrion (GO:0005739)                                                        | 12/1026                                       | 1.3E-03 | 9.312E-03        | DHX30; MTCH2; PKM; PPP2R1A; APEX1; UQCRC1; MT-CO2; GARS; PHB; HSP61; PRDX6; ATP5J2 |
| 19 | Set1C/COMPASS complex (GO:0048188)                                                | 2/13                                          | 1.4E-03 | 9.312E-03        | DPY30; BPTF                                                                        |
| 20 | tertiary granule lumen (GO:1904724)                                               | 3/55                                          | 1.7E-03 | 1.085E-02        | SPTAN1; ILF2; PGMI                                                                 |
| 21 | nucleolus (GO:0005730)                                                            | 9/676                                         | 2.3E-03 | 1.422E-02        | DDX17; DDX6; XPO1; DDX39A; NSUN2; DDX1; APEX1; ILF2; SPTBN1                        |
| 22 | cytosolic part (GO:0044445)                                                       | 4/159                                         | 4.7E-03 | 2.697E-02        | CCT3; CCT2; TCP1; RPSA                                                             |
| 23 | ribonucleoprotein granule (GO:0035770)                                            | 3/80                                          | 4.8E-03 | 2.697E-02        | DDX6; DHX30; CKAP4                                                                 |
| 24 | vacuolar lumen (GO:0005775)                                                       | 4/161                                         | 4.9E-03 | 2.697E-02        | CCT2; DYNC1H1; VCP; PRDX6                                                          |
| 25 | integral component of luminal side of endoplasmic reticulum membrane (GO:0071556) | 2/29                                          | 6.7E-03 | 3.525E-02        | CANX; HLA-B                                                                        |
| 26 | nuclear speck (GO:0016607)                                                        | 5/296                                         | 8.6E-03 | 4.331E-02        | DDX17; ATXN2L; DDX39A; APEX1; CKAP4                                                |

The analysis was performed using the EnrichR app and the GO database. Each hit is additionally supplemented with proteins enriching the given ontological term.

**Table S7. Ontology analysis (molecular functions, MF) for CRNDEP protein interactants found herein.**

| #  | Molecular function - Ontological terms             | Ratio of identified proteins in each category | p-value | Adjusted p-value | Identified proteins                                                                                                                                                                                                                                                                                                 |
|----|----------------------------------------------------|-----------------------------------------------|---------|------------------|---------------------------------------------------------------------------------------------------------------------------------------------------------------------------------------------------------------------------------------------------------------------------------------------------------------------|
| 1  | RNA binding (GO:0003723)                           | 44/1387                                       | 1.0E-28 | 1.19E-25         | YWHAIE; DDX6; VCP; TERC; NUFIP2; DDX1; RTCB; CSTF2; MRPL16; SLC3A2; EPRS; IFT1; ELAVL1; IPO5; SYNCRIP; DDX30; TRIM28; FAM120A; CTNNA1; IGF2BP3; YWHAG; SPTBN1; PDIA3; DDX17; CCT3; DYNC1H1; FIP5; DARS; NSUN2; PABPC4; CNBP; RPSA; HSP61; ILF2; HNRNPAB; CKAP4; ATXN2L; PKM; DDX39A; HNRNPK; APEX1; TCP1; CANX; EZR |
| 2  | cadherin binding (GO:0045296)                      | 15/313                                        | 4.0E-12 | 2.29E-09         | YWHAIE; DDX6; SLC3A2; PAICS; PRDX6; ATXN2L; ATIC; PKM; HNRNPK; CTNNA1; EZR; PDLIM5; SPTAN1; SPTBN1; PEKP                                                                                                                                                                                                            |
| 3  | ubiquitin protein ligase binding (GO:0031625)      | 10/284                                        | 3.5E-07 | 1.34E-04         | YWHAIE; CCT2; VCP; TP11; TRIM28; TCP1; UQCRC1; CKB; SQSTM1; PRDX6                                                                                                                                                                                                                                                   |
| 4  | ubiquitin-like protein ligase binding (GO:0044389) | 10/297                                        | 5.3E-07 | 1.51E-04         | YWHAIE; CCT2; VCP; TP11; TRIM28; TCP1; UQCRC1; CKB; SQSTM1; PRDX6                                                                                                                                                                                                                                                   |
| 5  | double-stranded RNA binding (GO:0003725)           | 5/59                                          | 5.1E-06 | 1.18E-03         | DDX30; TERC; SLC3A2; ELAVL1; ILF2                                                                                                                                                                                                                                                                                   |
| 6  | ATP dependent RNA helicase (GO:0004004)            | 5/67                                          | 9.7E-06 | 1.59E-03         | DDX17; DDX6; DHX30; DDX39A; DDX1                                                                                                                                                                                                                                                                                    |
| 7  | helicase activity (GO:0004386)                     | 3/34                                          | 4.0E-04 | 4.64E-02         | DDX17; DDX6; DDX1                                                                                                                                                                                                                                                                                                   |
| 8  | aminoacyl-tRNA ligase activity (GO:0004812)        | 3/41                                          | 7.0E-04 | 6.22E-02         | DARS; GARS; EPRS                                                                                                                                                                                                                                                                                                    |
| 9  | vinculin binding (GO:0017166)                      | 2/10                                          | 7.9E-04 | 6.46E-02         | RTCB; CTNNA1                                                                                                                                                                                                                                                                                                        |
| 10 | ATPase activity, coupled (GO:0042623)              | 4/94                                          | 6.9E-04 | 6.64E-02         | DDX17; RBBP4; DDX1; BPTF                                                                                                                                                                                                                                                                                            |
| 11 | protein kinase C binding (GO:0005080)              | 3/40                                          | 6.5E-04 | 6.84E-02         | PDLIM5; SQSTM1; YWHAG                                                                                                                                                                                                                                                                                               |
| 12 | poly(A) binding (GO:0008143)                       | 2/14                                          | 1.6E-03 | 1.21E-01         | DDX1; PABPC4                                                                                                                                                                                                                                                                                                        |
| 13 | MHC protein complex binding (GO:0023023)           | 2/19                                          | 2.9E-03 | 1.97E-01         | YWHAIE; PKM                                                                                                                                                                                                                                                                                                         |
| 14 | poly-purine tract binding (GO:0070717)             | 2/20                                          | 3.2E-03 | 2.06E-01         | DDX1; PABPC4                                                                                                                                                                                                                                                                                                        |
| 15 | protein transporter activity (GO:0008565)          | 3/80                                          | 4.8E-03 | 2.91E-01         | IPO7; IPO4; IPO5                                                                                                                                                                                                                                                                                                    |
| 16 | protein kinase binding (GO:0019901)                | 7/495                                         | 5.1E-03 | 2.94E-01         | PRC1; EZR; PDLIM5; ELAVL1; SQSTM1; YWHAG; TUBA4A                                                                                                                                                                                                                                                                    |
| 17 | histone deacetylase binding (GO:0042826)           | 3/85                                          | 5.7E-03 | 3.12E-01         | YWHAIE; RBBP4; PHB                                                                                                                                                                                                                                                                                                  |
| 18 | nuclear localization sequence binding (GO:0008139) | 2/28                                          | 6.3E-03 | 3.29E-01         | IPO4; IPO5                                                                                                                                                                                                                                                                                                          |
| 19 | protein homodimerization activity (GO:0042803)     | 8/664                                         | 7.2E-03 | 3.46E-01         | ATIC; TERC; ERP29; DPY30; EPRS; ELAVL1; PRDX6; SRM                                                                                                                                                                                                                                                                  |
| 20 | mRNA binding (GO:0003729)                          | 4/179                                         | 7.2E-03 | 3.58E-01         | CSTF2; IGF2BP3; ELAVL1; HNRNPAB                                                                                                                                                                                                                                                                                     |
| 21 | phosphoric diester hydrolase activity (GO:0008081) | 2/33                                          | 8.7E-03 | 3.98E-01         | PDIA3; APEX1                                                                                                                                                                                                                                                                                                        |
| 22 | ATPase activity (GO:0016887)                       | 4/203                                         | 1.1E-02 | 4.87E-01         | DYNC1H1; VCP; DDX39A; ATP5J2                                                                                                                                                                                                                                                                                        |

The analysis was performed using the EnrichR app and the GO database. Each hit is additionally supplemented with proteins enriching the given ontological term.

**Table S8. Ontology analysis (biological processes, BP) for CRNDEP protein interactants found herein.**

| #  | Biological process - Ontological terms                                                           | Ratio of identified proteins in each category | p-value  | Adjusted p-value | Identified proteins                                                      |
|----|--------------------------------------------------------------------------------------------------|-----------------------------------------------|----------|------------------|--------------------------------------------------------------------------|
| 1  | positive regulation of establishment of protein localization to telomere (GO:1904851)            | 3/10                                          | 2.11E-08 | 7.14E-06         | CCT3; CCT2; TCP1                                                         |
| 2  | regulation of establishment of protein localization to telomere (GO:0070203)                     | 3/11                                          | 2.63E-08 | 7.14E-06         | CCT3; CCT2; TCP1                                                         |
| 3  | regulation of protein localization to Cajal body (GO:1904869)                                    | 3/11                                          | 2.92E-08 | 7.14E-06         | CCT3; CCT2; TCP1                                                         |
| 4  | mRNA splicing via spliceosome (GO:0003398)                                                       | 6/274                                         | 2.94E-06 | 5.33E-04         | DDX39A; HNRNPK; DDX39B; DDX1; CSTF2; ELAVL1                              |
| 5  | purine nucleoside monophosphate biosynthetic process (GO:0009127)                                | 3/12                                          | 9.99E-06 | 1.38E-03         | ATIC; IMPDH2; PAICS                                                      |
| 6  | regulation of cytoplasmic translation (GO:2000765)                                               | 3/15                                          | 1.37E-05 | 1.38E-03         | PKM; CNBP; YBX3                                                          |
| 7  | positive regulation of telomerase RNA localization to Cajal body (GO:1904874)                    | 3/15                                          | 1.37E-05 | 1.38E-03         | CCT3; CCT2; TCP1                                                         |
| 8  | purine ribonucleoside monophosphate biosynthetic process (GO:0009168)                            | 3/16                                          | 1.82E-05 | 1.50E-03         | ATIC; IMPDH2; PAICS                                                      |
| 9  | stress granule assembly (GO:0034063)                                                             | 3/21                                          | 3.73E-05 | 2.25E-03         | ATXN2L; DDX6; DYNCH1H1                                                   |
| 10 | RNA splicing via transesterification reactions with bulged adenosine as nucleophile (GO:0003777) | 5/251                                         | 3.73E-05 | 2.25E-03         | DDX39A; HNRNPK; DDX39B; CSTF2; ELAVL1                                    |
| 11 | canonical glycolysis (GO:0061621)                                                                | 3/24                                          | 4.57E-05 | 2.44E-03         | TP11; PKM; PEKP                                                          |
| 12 | tRNA processing (GO:0008033)                                                                     | 4/64                                          | 7.84E-05 | 3.73E-03         | NSUN2; DDX1; RTCB; CSTF2                                                 |
| 13 | cellular response to indole-3-methanol (GO:0071681)                                              | 2/5                                           | 9.19E-05 | 4.16E-03         | JUP; CTNNA1                                                              |
| 14 | scatRNA localization to Cajal body (GO:0090666)                                                  | 2/5                                           | 1.61E-04 | 6.06E-03         | CCT2; TCP1                                                               |
| 15 | regulation of apoptotic cell clearance (GO:2000425)                                              | 2/8                                           | 1.94E-04 | 6.06E-03         | C3; C4A                                                                  |
| 16 | positive regulation of protein import into nucleus (GO:0042307)                                  | 3/28                                          | 1.83E-04 | 6.06E-03         | TRIM28; JUP; IPO5                                                        |
| 17 | glycolytic process (GO:0006096)                                                                  | 3/29                                          | 1.90E-04 | 6.06E-03         | TP11; PKM; PGM1                                                          |
| 18 | positive regulation of protein import (GO:1904591)                                               | 3/30                                          | 1.94E-04 | 6.06E-03         | TRIM28; JUP; IPO5                                                        |
| 19 | antigen processing and presentation of peptide antigen via MHC class I (GO:0002474)              | 3/33                                          | 1.94E-04 | 6.06E-03         | PDIA3; CANX; HLA-B                                                       |
| 20 | positive regulation of telomere maintenance via telomerase (GO:0032212)                          | 3/33                                          | 1.94E-04 | 6.06E-03         | CCT3; CCT2; TCP1                                                         |
| 21 | regulation of protein import into nucleus (GO:0042306)                                           | 3/36                                          | 2.86E-04 | 8.36E-03         | TRIM28; JUP; IPO5                                                        |
| 22 | protein import (GO:0017038)                                                                      | 4/89                                          | 4.22E-04 | 1.12E-02         | ALDH3A2; IPO7; IPO4; IPO5                                                |
| 23 | positive regulation of transcription DNA-templated (GO:0045893)                                  | 11/1183                                       | 4.22E-04 | 1.12E-02         | TRIM28; DDX39B; JUP; CNBP; APEX1; NME2; PHB; ILF2; SQSTM1; HNRNPAB; BPTF |
| 24 | DNA replication-dependent nucleosome assembly (GO:0006335)                                       | 2/10                                          | 5.39E-04 | 1.30E-02         | RBBP4; IPO4                                                              |
| 25 | carbohydrate catabolic process (GO:0016052)                                                      | 3/41                                          | 5.39E-04 | 1.30E-02         | TP11; PKM; PGM1                                                          |
| 26 | positive regulation of translation (GO:0045727)                                                  | 4/100                                         | 5.47E-04 | 1.30E-02         | PKM; CNBP; ELAVL1; YBX3                                                  |

The analysis was performed using the EnrichR app and the GO database. Each hit is additionally supplemented with proteins enriching the given ontological term.

**Table S9. Ontology analysis for CRNDP protein interactants found herein performed in the context of biological pathways.**

|    | Biological pathways - Ontological terms                                                                         | Ratio of identified proteins in each category | Percentage of identified proteins in each category | p - value | Adj. p - value | Identified proteins                                                                                                             |
|----|-----------------------------------------------------------------------------------------------------------------|-----------------------------------------------|----------------------------------------------------|-----------|----------------|---------------------------------------------------------------------------------------------------------------------------------|
| 1  | Assembly of the primary cilium Homo sapiens R-HSA-5617833                                                       | 8/187                                         | 4.28%                                              | 1.3E-06   | 0.0004         | YWHAE; CCT3; CCT2; DYNC1H1; PPP2R1A; TCP1; YWHAG; TUBA4A                                                                        |
| 2  | Formation of tubulin folding intermediates by CCT/TriC Homo sapiens R-HSA-389960                                | 4/25                                          | 16.00%                                             | 3.6E-06   | 0.0004         | CCT3; CCT2; TCP1; TUBA4A                                                                                                        |
| 3  | Prefoldin mediated transfer of substrate to CCT/TriC Homo sapiens R-HSA-389957                                  | 4/27                                          | 14.81%                                             | 4.9E-06   | 0.0004         | CCT3; CCT2; TCP1; TUBA4A                                                                                                        |
| 4  | Folding of actin by CCT/TriC Homo sapiens R-HSA-390450                                                          | 3/10                                          | 30.00%                                             | 8.7E-06   | 0.0004         | CCT3; CCT2; TCP1                                                                                                                |
| 5  | G2M Transition Homo sapiens R-HSA-69275                                                                         | 7/173                                         | 4.05%                                              | 9.0E-06   | 0.0004         | YWHAE; DYNC1H1; XPO1; RBBP4; PPP2R1A; YWHAG; TUBA4A                                                                             |
| 6  | Mitotic G2-G2M phases Homo sapiens R-HSA-453274                                                                 | 7/175                                         | 4.00%                                              | 9.7E-06   | 0.0004         | YWHAE; DYNC1H1; XPO1; RBBP4; PPP2R1A; YWHAG; TUBA4A                                                                             |
| 7  | Cooperation of Prefoldin and TriC/CCT in actin and tubulin folding Homo sapiens R-HSA-389958                    | 4/32                                          | 12.50%                                             | 1.0E-05   | 0.0004         | CCT3; CCT2; TCP1; TUBA4A                                                                                                        |
| 8  | Glycolysis Homo sapiens R-HSA-70171                                                                             | 4/32                                          | 12.50%                                             | 1.0E-05   | 0.0004         | TP1; PKM; PPP2R1A; PKF                                                                                                          |
| 9  | Organelle biogenesis and maintenance Homo sapiens R-HSA-1852241                                                 | 9/326                                         | 2.76%                                              | 1.0E-05   | 0.0004         | YWHAE; CCT3; CCT2; DYNC1H1; PPP2R1A; TCP1; MRPL16; YWHAG; TUBA4A                                                                |
| 10 | Loss of Nlp from mitotic centrosomes Homo sapiens R-HSA-380259                                                  | 5/69                                          | 7.25%                                              | 1.1E-05   | 0.0004         | YWHAE; DYNC1H1; PPP2R1A; YWHAG; TUBA4A                                                                                          |
| 11 | Loss of proteins required for interphase microtubule organization?from the centrosome Homo sapiens R-HSA-380284 | 5/69                                          | 7.25%                                              | 1.1E-05   | 0.0004         | YWHAE; DYNC1H1; PPP2R1A; YWHAG; TUBA4A                                                                                          |
| 12 | AURKA Activation by TPX2 Homo sapiens R-HSA-8954518                                                             | 5/72                                          | 6.94%                                              | 1.4E-05   | 0.0005         | YWHAE; DYNC1H1; PPP2R1A; YWHAG; TUBA4A                                                                                          |
| 13 | Purine nucleoside monophosphate biosynthesis Homo sapiens R-HSA-73817                                           | 3/12                                          | 25.00%                                             | 1.6E-05   | 0.0005         | ATIC; IMPDH2; PAICS                                                                                                             |
| 14 | Glucose metabolism Homo sapiens R-HSA-70326                                                                     | 5/79                                          | 6.33%                                              | 2.2E-05   | 0.0006         | TP1; PKM; PPP2R1A; PGM1; PKF                                                                                                    |
| 15 | Centrosome maturation Homo sapiens R-HSA-380287                                                                 | 5/79                                          | 6.33%                                              | 2.2E-05   | 0.0006         | YWHAE; DYNC1H1; PPP2R1A; YWHAG; TUBA4A                                                                                          |
| 16 | Recruitment of mitotic centrosome proteins and complexes Homo sapiens R-HSA-380270                              | 5/79                                          | 6.33%                                              | 2.2E-05   | 0.0006         | YWHAE; DYNC1H1; PPP2R1A; YWHAG; TUBA4A                                                                                          |
| 17 | Regulation of PLK1 Activity at G2M Transition Homo sapiens R-HSA-2565942                                        | 5/87                                          | 5.75%                                              | 3.5E-05   | 0.0009         | YWHAE; DYNC1H1; PPP2R1A; YWHAG; TUBA4A                                                                                          |
| 18 | Gene Expression Homo sapiens R-HSA-74160                                                                        | 19/1631                                       | 1.16%                                              | 4.3E-05   | 0.0010         | YWHAE; DYNC1H1; PPP2R1A; YWHAG; TUBA4A                                                                                          |
| 19 | Anchoring of the basal body to the plasma membrane Homo sapiens R-HSA-5620912                                   | 5/97                                          | 5.15%                                              | 5.8E-05   | 0.0013         | NSUN2; DD1; RTCB; CSTF2; EPRS                                                                                                   |
| 20 | RNA processing Homo sapiens R-HSA-72306                                                                         | 5/103                                         | 4.85%                                              | 7.8E-05   | 0.0016         | NSUN2; DD1; RTCB; CSTF2; EPRS                                                                                                   |
| 21 | BBSome-mediated cargo-targeting to cilium Homo sapiens R-HSA-5620922                                            | 3/23                                          | 13.04%                                             | 1.2E-04   | 0.0025         | CCT3; CCT2; TCP1                                                                                                                |
| 22 | Cyosolic RNA aminacylation Homo sapiens R-HSA-379716                                                            | 3/24                                          | 12.50%                                             | 1.4E-04   | 0.0027         | DARS; GARS; EPRS                                                                                                                |
| 23 | Antigen Presentation: Folding, assembly and peptide loading of class I MHC Homo sapiens R-HSA-383170            | 3/25                                          | 12.00%                                             | 1.6E-04   | 0.0029         | PDIA3; CANX; HLA-B                                                                                                              |
| 24 | Metabolism Homo sapiens R-HSA-1430728                                                                           | 19/1908                                       | 1.00%                                              | 3.4E-04   | 0.0069         | FDPF; DARS; TP1; RPSA; EPRS; PGD; PAICS; ATP5A2; SRM; ALDH2A2; ATIC; PKM; MTHFD1; PPP2R1A; PPP2R1B; PDZ; UQCRC1; CNB; PGM1; PKF |
| 25 | Purine metabolism Homo sapiens R-HSA-73847                                                                      | 3/34                                          | 8.82%                                              | 4.0E-04   | 0.0087         | ATIC; IMPDH2; PAICS                                                                                                             |
| 26 | HLA (ELAVL1) binds and stabilizes mRNA Homo sapiens R-HSA-450520                                                | 2/6                                           | 25.00%                                             | 4.9E-04   | 0.0079         | XPO1; ELAVL1                                                                                                                    |
| 27 | Association of TriC/CCT with target proteins during biogenesis Homo sapiens R-HSA-390471                        | 3/39                                          | 7.69%                                              | 6.1E-04   | 0.0094         | CCT3; CCT2; TCP1                                                                                                                |
| 28 | Chaperonin-mediated protein folding Homo sapiens R-HSA-390466                                                   | 4/95                                          | 4.21%                                              | 7.2E-04   | 0.0103         | CCT3; CCT2; TCP1; TUBA4A                                                                                                        |
| 29 | Cooperation of PDCL (PhLP1) and TriC/CCT in G-protein beta folding Homo sapiens R-HSA-6814122                   | 3/42                                          | 7.14%                                              | 7.5E-04   | 0.0103         | CCT3; CCT2; TCP1                                                                                                                |
| 30 | RNA Aminoacylation Homo sapiens R-HSA-379724                                                                    | 3/42                                          | 7.14%                                              | 7.5E-04   | 0.0103         | DARS; GARS; EPRS                                                                                                                |
| 31 | RHO GTPase Effectors Homo sapiens R-HSA-195258                                                                  | 6/255                                         | 2.35%                                              | 7.6E-04   | 0.0103         | YWHAE; XPO1; PPP2R1A; PRCL; CTNNA1; YWHAG                                                                                       |
| 32 | Protein folding Homo sapiens R-HSA-391251                                                                       | 4/101                                         | 3.96%                                              | 9.1E-04   | 0.018          | CCT3; CCT2; TCP1; TUBA4A                                                                                                        |
| 33 | SeMet incorporation into proteins Homo sapiens R-HSA-2408517                                                    | 2/11                                          | 18.18%                                             | 9.6E-04   | 0.0121         | DARS; EPRS                                                                                                                      |
| 34 | Chk1/Chk2/Cds1 mediated inactivation of Cyclin B/Cdk1 complex Homo sapiens R-HSA-75035                          | 2/12                                          | 16.67%                                             | 1.1E-03   | 0.0141         | YWHAE; YWHAG                                                                                                                    |
| 35 | Metabolism of carbohydrates Homo sapiens R-HSA-71387                                                            | 6/282                                         | 2.13%                                              | 1.3E-03   | 0.0153         | TP1; PKM; PPP2R1A; PGD; PGM1; PKF                                                                                               |
| 36 | Cargo trafficking to the periciliary membrane Homo sapiens R-HSA-5620920                                        | 3/51                                          | 5.88%                                              | 1.3E-03   | 0.0155         | CCT3; CCT2; TCP1                                                                                                                |
| 37 | Calnexin/calreticulin cycle Homo sapiens R-HSA-901042                                                           | 2/15                                          | 13.33%                                             | 1.8E-03   | 0.0197         | PDIA3; CANX                                                                                                                     |
| 38 | Activation of BAD and translocation to mitochondria Homo sapiens R-HSA-111447                                   | 2/15                                          | 13.33%                                             | 1.8E-03   | 0.0197         | YWHAE; YWHAG                                                                                                                    |
| 39 | RNA processing in the nucleus Homo sapiens R-HSA-392499                                                         | 3/57                                          | 5.26%                                              | 1.8E-03   | 0.0197         | DDX1; RTCB; CSTF2                                                                                                               |
| 40 | Metabolism of proteins Homo sapiens R-HSA-6784531                                                               | 12/1074                                       | 1.12%                                              | 1.9E-03   | 0.0198         | PDIA3; CCT3; CCT2; DYNC1H1; HNRNPK; TCP1; CANX; RPSA; SPTAN1; CKAP4; TUBA4A; SPTBN1                                             |
| 41 | Regulation of proteins in the ER and Calnexin/Calreticulin cycle Homo sapiens R-HSA-532668                      | 2/17                                          | 11.76%                                             | 2.3E-03   | 0.0237         | PDIA3; CANX                                                                                                                     |
| 42 | Influenza Life Cycle Homo sapiens R-HSA-186235                                                                  | 4/136                                         | 2.94%                                              | 2.7E-03   | 0.0289         | XPO1; CANX; RPSA; IPO5                                                                                                          |
| 43 | Cell Cycle: Mitotic Homo sapiens R-HSA-68278                                                                    | 7/462                                         | 1.52%                                              | 3.5E-03   | 0.0340         | YWHAE; DYNC1H1; XPO1; RBBP4; PPP2R1A; YWHAG; TUBA4A                                                                             |
| 44 | Influenza Infection Homo sapiens R-HSA-186234                                                                   | 4/147                                         | 2.72%                                              | 3.6E-03   | 0.0340         | XPO1; CANX; RPSA; IPO5                                                                                                          |
| 45 | Nephron Interactions Homo sapiens R-HSA-373753                                                                  | 2/22                                          | 9.09%                                              | 3.9E-03   | 0.0355         | SPTAN1; SPTBN1                                                                                                                  |
| 46 | Cyclin A/B1 associated events during G2M transition Homo sapiens R-HSA-69273                                    | 2/22                                          | 9.09%                                              | 3.9E-03   | 0.0355         | XPO1; PPP2R1A                                                                                                                   |
| 47 | COP-mediated anterograde transport Homo sapiens R-HSA-6607878                                                   | 3/78                                          | 3.85%                                              | 4.5E-03   | 0.0398         | DYNC1H1; SPTAN1; SPTBN1                                                                                                         |
| 48 | Signaling by Rho GTPases Homo sapiens R-HSA-194315                                                              | 6/367                                         | 1.63%                                              | 4.7E-03   | 0.0412         | YWHAE; XPO1; PPP2R1A; PRCL; CTNNA1; YWHAG                                                                                       |
| 49 | Cytokine Signalling in Immune system Homo sapiens R-HSA-1280215                                                 | 8/620                                         | 1.29%                                              | 4.8E-03   | 0.0412         | PPP2R1A; HLA-B; PHB; ITT1; SPTAN1; TRIM21; SQSTM1; SPTBN1                                                                       |

The analysis was performed using the EnrichR app and the Reactome database. Each hit is additionally supplemented with proteins enriching the given ontological term.

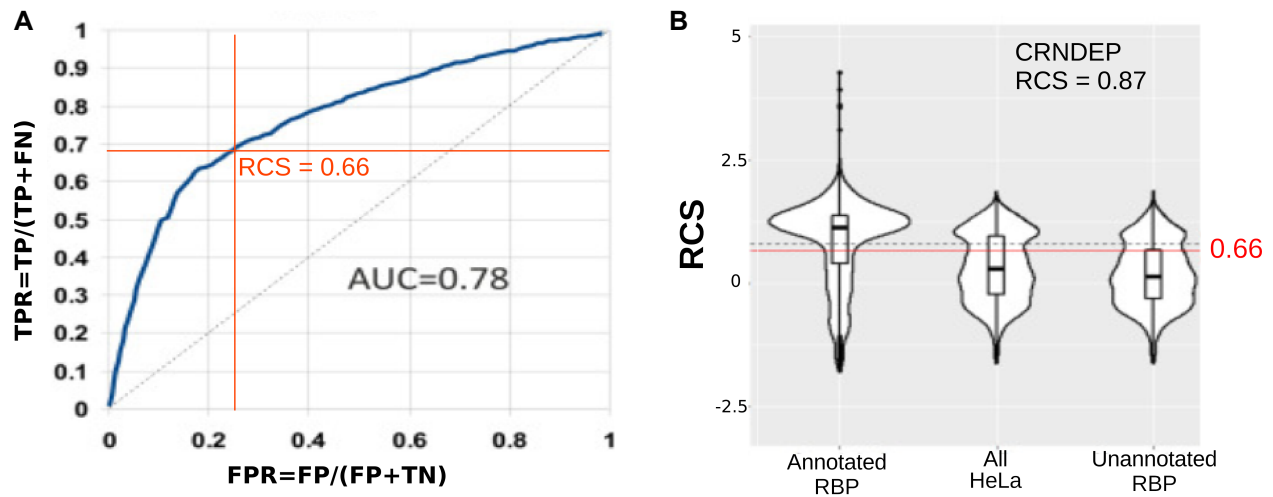

**Fig. S18. Assessment of RNA binding capabilities of CRNDEP.** The ability of CRNDEP to bind RNA molecules was evaluated with the SONAR application. The ROC curve plotted for the generated statistical model (A) revealed its good discriminating capabilities. The model was able to distinguish RNA-binding from non-binding proteins with the sensitivity (TPR) and specificity (1-FPR) of 0.69 and 0.74, respectively (RCS cut-off point = 0.66, AUC = 0.78). The RCS value estimated with the same model for CRNDEP was 0.87 (denoted with a gray dashed line in B) which implies that CRNDEP can probably bind RNA molecules. RBP – RNA-binding protein, RCS – RBP classification score, Annotated RBP – all identified RBPs in the HeLa cell line, All HeLa – a whole protein set from the HeLa cell line, Unannotated RBP – proteins from the HeLa cell line not being RBPs, TPR – true positive rate, FPR – false positive rate, FP – false positive, TN – true negative, TP – true positive, FN – false negative, AUC – area under ROC curve.

# Analysis of relative *CRNDE* transcripts expression level in different ovarian cancer cell lines.

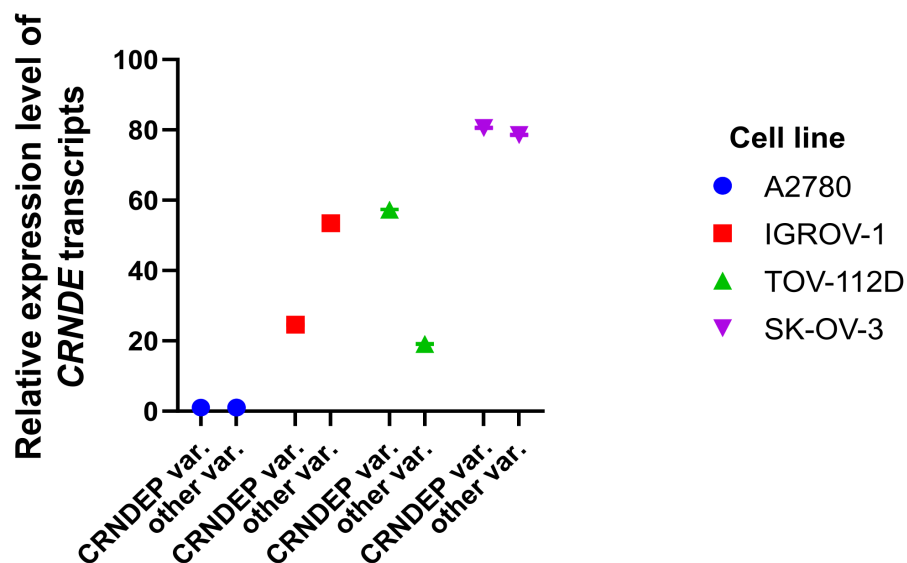

**Fig. S19. Relative *CRNDE* expression in different ovarian cancer cell lines.** Comparative expression analysis was performed for different *CRNDE* splice variants (transcripts): CRNDEP var. – transcripts coding for CRNDEP micropeptide (FJ466686.1 and NR\_170995.1), other var. – other CRNDEP-non-coding transcripts (FJ466685.1, NR\_034105.4 and NR\_034106.3). *CRNDE* expression was normalized against the expression of the *HGPRT* reference gene. The A2780 cell line was used as a calibrator.

**Table S10. A list of synthetic DNA molecules utilized in the present study.**

| Molecule name   | Sequence (5' → 3')                                                                                       | Description                                                                                                                                                                                                                                                                                                                                                                |
|-----------------|----------------------------------------------------------------------------------------------------------|----------------------------------------------------------------------------------------------------------------------------------------------------------------------------------------------------------------------------------------------------------------------------------------------------------------------------------------------------------------------------|
| SH1_CRNDE_Top   | <u>GATCGGGAGCTACTGTACTGGCT</u><br><u>ATTGGAAGGAGTCAAGAGCTCCT</u><br>TCCAATAGCCAGTACAGTAGCTC<br>CTTTTTTGA | Pair of mutually complementary oligonucleotides forming hairpins after their denaturation and subsequent renaturation. Sticky ends specific to HindIII and BamHI restriction enzymes are underlined. This hairpin is capable of silencing the expression of all reference <i>CRNDE</i> transcripts, i.e., NR_034105.4, NR_034106.3, NR_110453.2, NR_110454.2, NR_170995.1. |
| SH1_CRNDE_Bot   | <u>AGCTTCAAAAAAGGAGCTACTGT</u><br><u>ACTGGCTATTGGAAGGAGCTCTT</u><br>GACTCCTTCCAATAGCCAGTACA<br>GTAGCTCCC |                                                                                                                                                                                                                                                                                                                                                                            |
| SH2_CRNDE_Top   | <u>GATCGAGAAGAAGGTTAAGCTGT</u><br><u>ATTTGATTGCCTCAAGAGGGCAA</u><br>TCAAATACAGCTTAACCTTCTTC<br>TTTTTTTGA | Pair of mutually complementary oligonucleotides forming hairpins after their denaturation and subsequent renaturation. Sticky ends specific to HindIII and BamHI restriction enzymes are underlined. This hairpin is capable of silencing the expression of all reference <i>CRNDE</i> transcripts, i.e., NR_034105.4, NR_034106.3, NR_110453.2, NR_110454.2, NR_170995.1. |
| SH2_CRNDE_Bot   | <u>AGCTTCAAAAAAGAAGAAGGTT</u><br><u>AAGCTGTATTTGATTGCCCTCTT</u><br>GAGGCAATCAAATACAGCTTAAC<br>CTTCTTCTC  |                                                                                                                                                                                                                                                                                                                                                                            |
| SH3_CRNDE_Top   | <u>GATCGGAAGATAAGGAGGATGCC</u><br><u>ACTGGAAATGTTCAAGAGACATT</u><br>TCCAGTGGCATCCTCCTTATCTT<br>CTTTTTTGA | Pair of mutually complementary oligonucleotides forming hairpins after their denaturation and subsequent renaturation. Sticky ends specific to HindIII and BamHI restriction enzymes are underlined. This hairpin is capable of silencing the expression of the CRNDEP-coding reference transcript only, i.e. NR_170995.1.                                                 |
| SH3_CRNDE_Bot   | <u>AGCTTCAAAAAAGAAGATAAGGA</u><br><u>GGATGCCACTGGAAATGTCTCTT</u><br>GAACATTTCCAGTGGCATCCTCC<br>TTATCTTCC |                                                                                                                                                                                                                                                                                                                                                                            |
| SCR_Top         | <u>GATCGGGAGCAATATCGTGGATG</u><br><u>AAACGGTGAAATCAAGAGTTTCA</u><br>CCGTTTCATCCACGATATTGCTC<br>CTTTTTTGA | Pair of mutually complementary oligonucleotides forming hairpins after their denaturation and subsequent renaturation. Sticky ends specific to HindIII and BamHI restriction enzymes are underlined. This scrambled (control) hairpin is incapable of silencing any known human transcripts.                                                                               |
| SCR_Bot         | <u>AGCTTCAAAAAAGGAGCAATATC</u><br><u>GTGGATGAAACGGTGAAACTCTT</u><br>GATTTACCGTTTCATCCACGAT<br>ATTGCTCCC  |                                                                                                                                                                                                                                                                                                                                                                            |
| Bglob-pA-R      | CCCATATGTCCTTCCGAGTG                                                                                     | Sequencing primer                                                                                                                                                                                                                                                                                                                                                          |
| CAG_seqF        | GCCTCTGCTAACCATGTTC                                                                                      | PCR primer used for amplification of the Flagx2 insert.                                                                                                                                                                                                                                                                                                                    |
| FL243mR         | CCGAATTCaCTTGTCATCG                                                                                      | Primer used in a combination with the CAG_seqF primer for amplification of the Flagx2 insert. The lowercase adenine was introduced to the original Flagx2-coding sequence to generate a stop codon after the Flag-tags.                                                                                                                                                    |
| sgRNA_AAVS1_TOP | <u>ACCGGGGCCACTAGGGACAGGAT</u>                                                                           | Pair of oligonucleotides which after denaturation and renaturation form the DNA fragment encoding the sgRNA T2, that targets the Cas9 endonuclease to the AAVS1 safe harbor. BbsI-specific sticky ends are                                                                                                                                                                 |
| sgRNA_AAVS1_BOT | <u>AAACATCCTGTCCCTAGTGGCCC</u>                                                                           |                                                                                                                                                                                                                                                                                                                                                                            |

| Molecule name | Sequence (5' → 3')                                                            | Description                                                                                                                                                                                                                                                                                        |
|---------------|-------------------------------------------------------------------------------|----------------------------------------------------------------------------------------------------------------------------------------------------------------------------------------------------------------------------------------------------------------------------------------------------|
|               |                                                                               | underlined.                                                                                                                                                                                                                                                                                        |
| primer_B      | GGGGACAAGTTTGTACAAAAAAG<br>CAGGCTTC <u>CACCATG</u> TTGGCTGAA<br>ATTCATCCCAAGG | Primers B and L were used to amplify the CRNDEP ORF sequence encompassed by the attB sites, allowing for the BP clonase-catalyzed recombination of the obtained PCR product into the pDONR vector used in the Gateway cloning system (Thermo Fisher Scientific). The Kozak sequence is underlined. |
| primer_L      | GGGGACCACTTTGTACAAGAAAG<br>CTGGGTGTAGTCTATAAACAGGA<br>ATACCC                  |                                                                                                                                                                                                                                                                                                    |
| promoU6_F     | GGACTATCATATGCTTACCGT                                                         | Sequencing primer complementary to the U6 promoter                                                                                                                                                                                                                                                 |
| SV40          | GTGGTTTGTCCAAACTCATC                                                          | Sequencing primer complementary to the replication origin of the SV40 virus.                                                                                                                                                                                                                       |



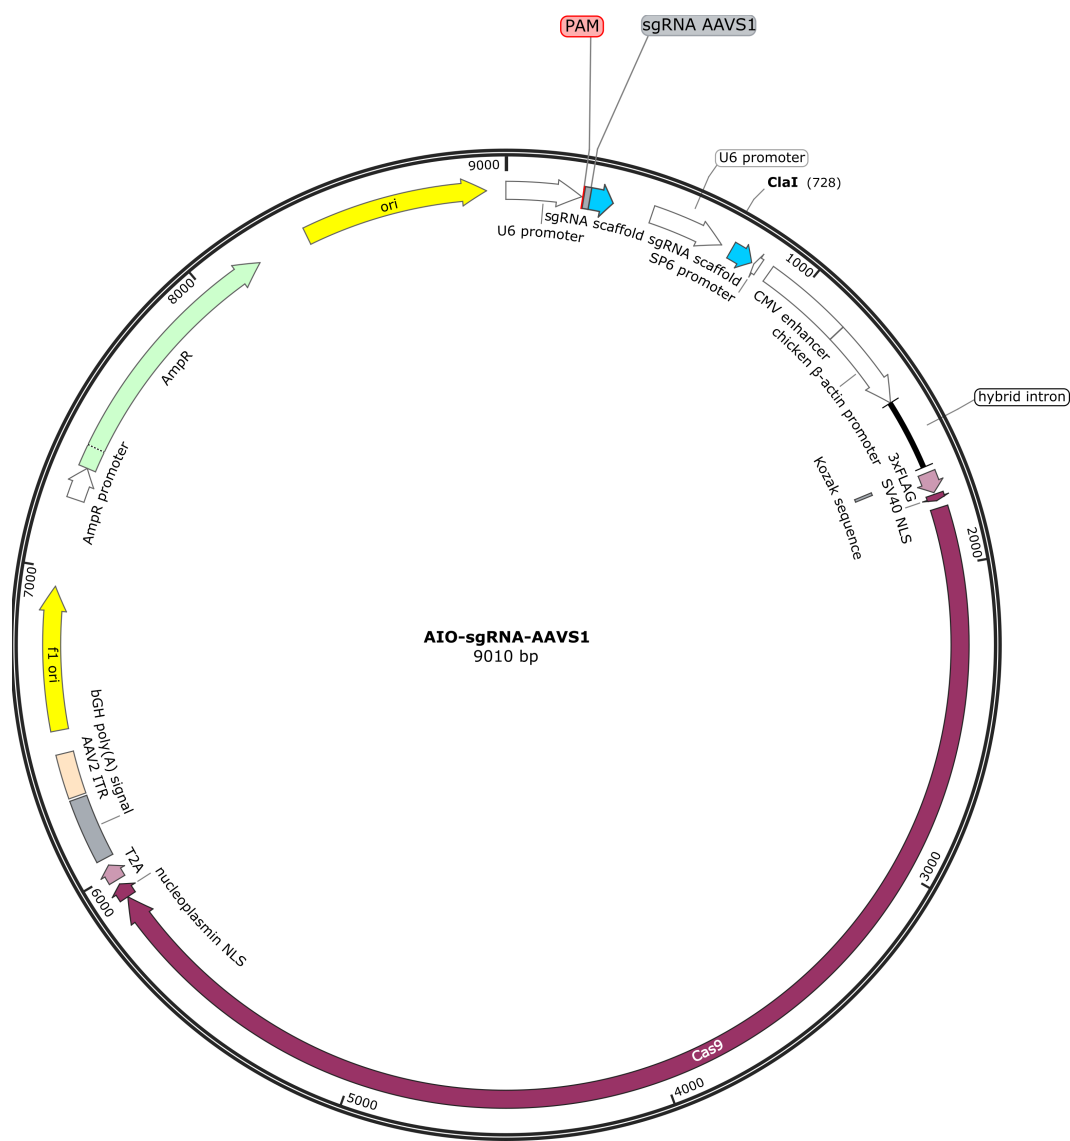

**Fig. S20. AIO-sgRNA-AAVS1 plasmid scheme.** This construct was used for CRISPR/Cas9-dependent editing of the SK-OV-3 and A2780 ovarian cancer cell lines' genomes. It encodes a mutated Cas9 variant (D10A) which cuts only one strand of genomic DNA. The plasmid additionally codes for the AAVS1 locus-targeting sgRNA expressed from the U6 promoter. sgRNA – single-guide RNA. PAM – protospacer adjacent motif.

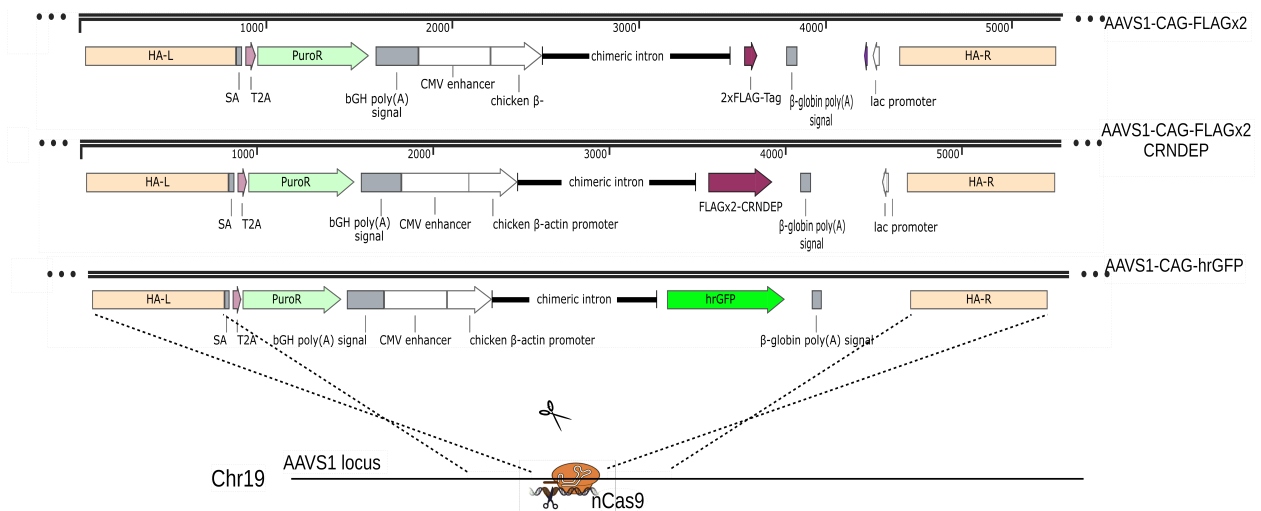

**Fig. S21. A scheme of expression cassettes inserted into AAVS1 safe harbor locus in the SK-OV-3 and A2780 cell lines.** Names of the plasmids harboring each cassette are provided on the right. All inserts contained puromycin resistance gene (PuroR), expression of which enabled the selection of cells with the cassettes integrated into their genomes.

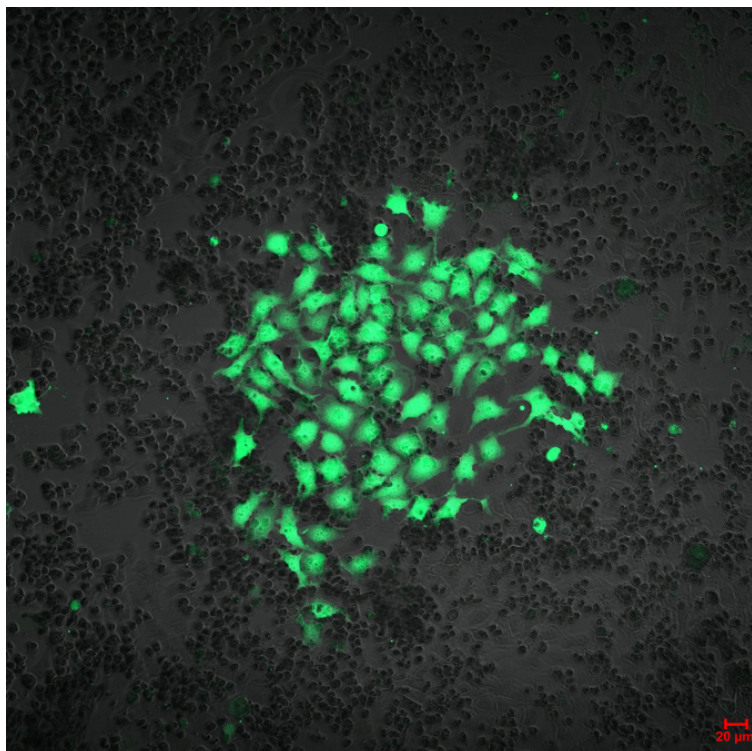

**Fig. S22.** A positive result of the *hrGFP* gene recombination into the HeLa genome using the CRISPR/Cas9 technology.

**Table S11. A list of antibodies used in the present study.**

| #  | Detected protein                  | Immunized species | Manufacturer                  | Catalog no. | Concentration /amount used (method)          | Antibody type/ conjugate |
|----|-----------------------------------|-------------------|-------------------------------|-------------|----------------------------------------------|--------------------------|
| 1  | CRNDEP                            | Rabbit            | Abgent Inc.                   | custom-made | 1:500 (IF, WB);<br>1:100 (DB);<br>10 µg (IP) | I/-                      |
| 2  | None (control IgG)                | Rabbit            | Sigma-Aldrich                 | I5006       | 10 µg (IP)                                   | I/-                      |
| 3  | Paxillin                          | Rabbit            | Abcam                         | abY113      | 1:250 (IF)                                   | I/-                      |
| 4  | Phospho-Histone H3 (Ser10)*, pHH3 | Mouse             | Thermo                        | MA515220    | 1:1,000 (IF)                                 | I/-                      |
| 5  | Flag-tag (clone M2)               | Mouse             | Sigma-Aldrich                 | A8592       | 1:1,500 (WB)                                 | I/HRP                    |
| 6  | Flag-tag (clone M2)               | Mouse             | Sigma-Aldrich                 | F1804       | 1:1,000 (IF)                                 | I/-                      |
| 7  | GFP                               | Mouse             | Thermo                        | MA5-15256   | 1:500 (WB)                                   | I/-                      |
| 8  | Centrin (clone 20H5)              | Mouse             | Merck Millipore               | 04-1624     | 1:500 (WB)                                   | I/-                      |
| 9  | α-tubulin (clone DM1A)            | Mouse             | Thermo                        | 62204       | 1:500 (WB)                                   | I/-                      |
| 10 | GAPDH                             | Rabbit            | CST                           | 8884        | 1:500 (WB)                                   | I/HRP                    |
| 11 | RFP                               | Rat               | Proteintech                   | 5f8         | 1:1,000 (WB)                                 | I/-                      |
| 12 | Mouse IgG                         | Horse             | Cell Signalling Technology    | 7076        | 1:10,000 (WB)                                | II/HRP                   |
| 13 | Mouse IgG                         | Goat              | Thermo                        | A -11029    | 1:500 (IF)                                   | II/Alexa Fluor 488       |
| 14 | Mouse IgG                         | Goat              | Thermo                        | A-21236     | 1:500 (IF)                                   | II/Alexa Fluor 647       |
| 15 | Rabbit IgG                        | Donkey            | GE HealthCare                 | A934        | 1:10,000 (WB)                                | II/HRP                   |
| 16 | Rabbit IgG                        | Goat              | Thermo                        | A-11034     | 1:500 (IF)                                   | II/Alexa Fluor 488       |
| 17 | Rabbit IgG                        | Goat              | Thermo                        | A-21245     | 1:500 (IF)                                   | II/Alexa Fluor 647       |
| 18 | Rabbit IgG                        | Goat              | Thermo                        | 31462       | 1:10,000 (DB)                                | II/HRP                   |
| 19 | Rat IgG                           | Goat              | Santa Cruz Biotechnology Inc. | sc-2006     | 1:10,000 (WB)                                | II/HRP                   |

IF – immunofluorescence; WB – western blot; IP – immunoprecipitation; DB – dot blot; HRP – horseradish peroxidase; I – primary antibody; II – secondary antibody.

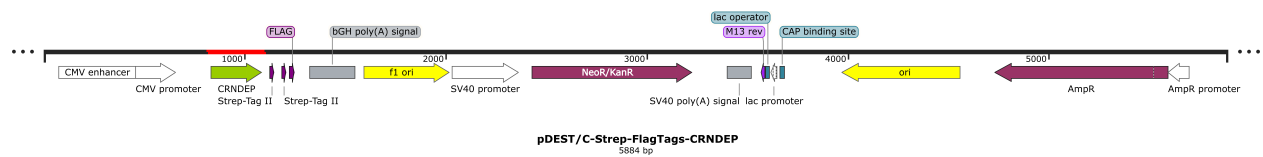

**Fig. S23. A scheme of the pDEST/C-Strep-FlagTags-CRNDEP plasmid.**

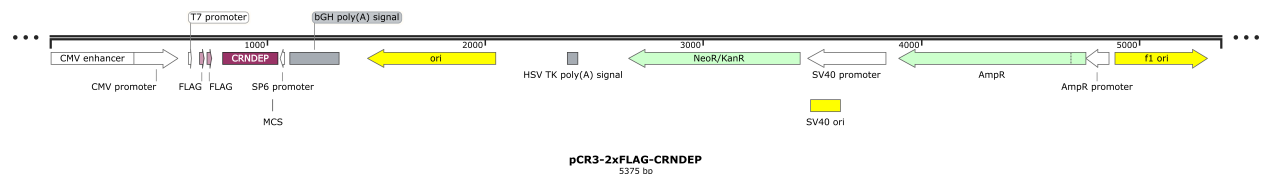

**Fig. S24. A scheme of the pCR3-2xFLAG-CRNDEP plasmid.** The FLAG2x-CRNDEP insert was subcloned from this plasmid to the AAVS1-CAG-hrGFP plasmid to get the AAVS1-CAG-FLAG2x-CRNDEP construct, harboring the AAVS1 locus-targeted expression cassette encoding the FLAG2x-CRNDEP fusion protein (see Fig. S21).

**Table S12. DNA short tandem repeat (STR) profiling results.**

| Locus             | Cell line  |              |                     |                               |               |
|-------------------|------------|--------------|---------------------|-------------------------------|---------------|
|                   | HeLa       | SK-OV-3      | A2780               | IGROV-1                       | TOV-112D      |
| <b>Amelogenin</b> | X          | X            | X                   | X                             | X             |
| <b>D3S1358</b>    | 15, 18     | 14           | 14, 16, (17)        | 14, 15                        | 15            |
| <b>D1S1656</b>    | 12, 15     | 11, 17.3     | 12, 13              | 12, 13, (14),<br>(15), (16)   | 18.3          |
| <b>D2S441</b>     | 10, 11     | 10, 11.3     | 11, 12              | 11, 15                        | 10, 14        |
| <b>D10S1248</b>   | 13, 15     | 13, 16, (17) | 13                  | 12, 12                        | 14            |
| <b>D13S317</b>    | (12), 13.3 | 8, 11        | 12, 13              | 8, 10                         | 8             |
| <b>Penta E</b>    | 7, 17      | 5, 13        | 10, 13              | 13, 17                        | 11            |
| <b>D16S539</b>    | 9, 10      | 12           | 11, 12, 13          | 11, 12                        | (9), (11), 12 |
| <b>D18S51</b>     | 16         | 16, 17, (18) | (14), 16, 18,<br>19 | 15, 16                        | 17            |
| <b>D2S1338</b>    | 17         | 18, 23       | 21, 22              | 17, 25                        | 19, 24        |
| <b>CSF1PO</b>     | 9, 10      | 11           | 10, 11              | 11, (13), (14),<br>(15)       | 12            |
| <b>Penta D</b>    | 8, 15      | 12, 13       | 8, 9                | 8, 10                         | 9             |
| <b>TH01</b>       | 7          | 9, 9.3       | 6                   | 7, 9.3                        | 6             |
| <b>vWA</b>        | 16, 18     | 17, 18       | 15, 16              | 16, (17), (20),<br>(21), (22) | 18            |
| <b>D21S11</b>     | 27, 28     | 30, 31.2     | 28                  | 26, (27), 30.2                | 31            |
| <b>D7S820</b>     | 8, 12      | 13, 14       | 10                  | 10.1, 10.3,<br>(11.1)         | 9, 10         |
| <b>D5S818</b>     | 11, 12     | 11           | 11, 12              | (11), 12                      | 10            |
| <b>TPOX</b>       | 8, 12      | 8, 11        | 8, 10               | 8, 11                         | 8, 11         |
| <b>D8S1179</b>    | 12, 13     | 14, 15       | 15, 17, (18)        | 14, (15), 16                  | 9, 13         |
| <b>D12S391</b>    | 20, 25     | 22           | 19, 20              | 20, (25), (26),<br>(27)       | 18, 18.3      |
| <b>D19S433</b>    | 13, 14     | 14, 14.2     | 12                  | 13, 14                        | 14            |
| <b>SE33</b>       | 20         | 16, 19       | (18), 19, 25.2      | (22), 23,<br>(23.2), 24       | 19            |
| <b>D22S1045</b>   | 16, 17     | 11, 16       | 15, 16              | 15, 16, 17, 18                | 11            |
| <b>FGA</b>        | 18, 21     | 24, 25       | 19, 24              | (20), 21, 25,<br>26           | 20            |

Alleles, the presence of which is uncertain due to weak fluorescence signals, are shown in brackets. Detailed results of the DNA STR profiling can be found in the supplementary file: Cell\_lines\_DNA\_STR\_profiling\_results.pdf. The Y chromosome-specific loci (DYS391, DYS576 and DYS570) have been excluded from the table as no alleles in these loci were identified in any of the analyzed cell lines.
