# Supplementary figures and images for: A Multi-Faceted Analysis Showing CRNDE Transcripts and a Recently Confirmed Micropeptide as Important Players in Ovarian Carcinogenesis
Source: MDPI journal article supplement (doi:10.3390/ijms25084381), 2024-04-16

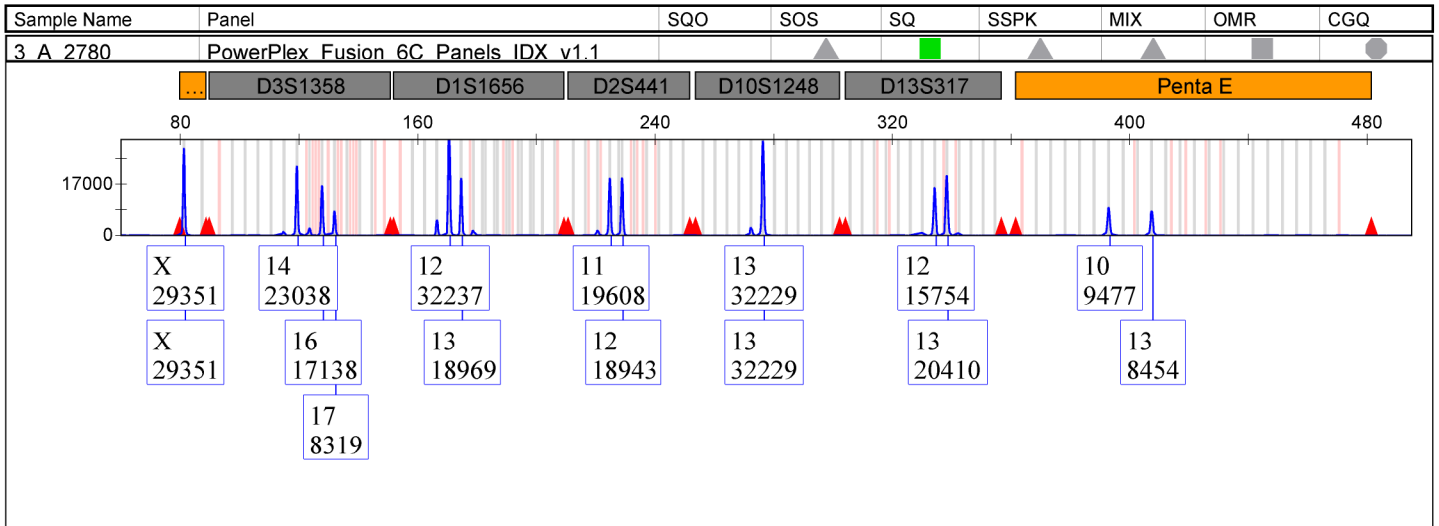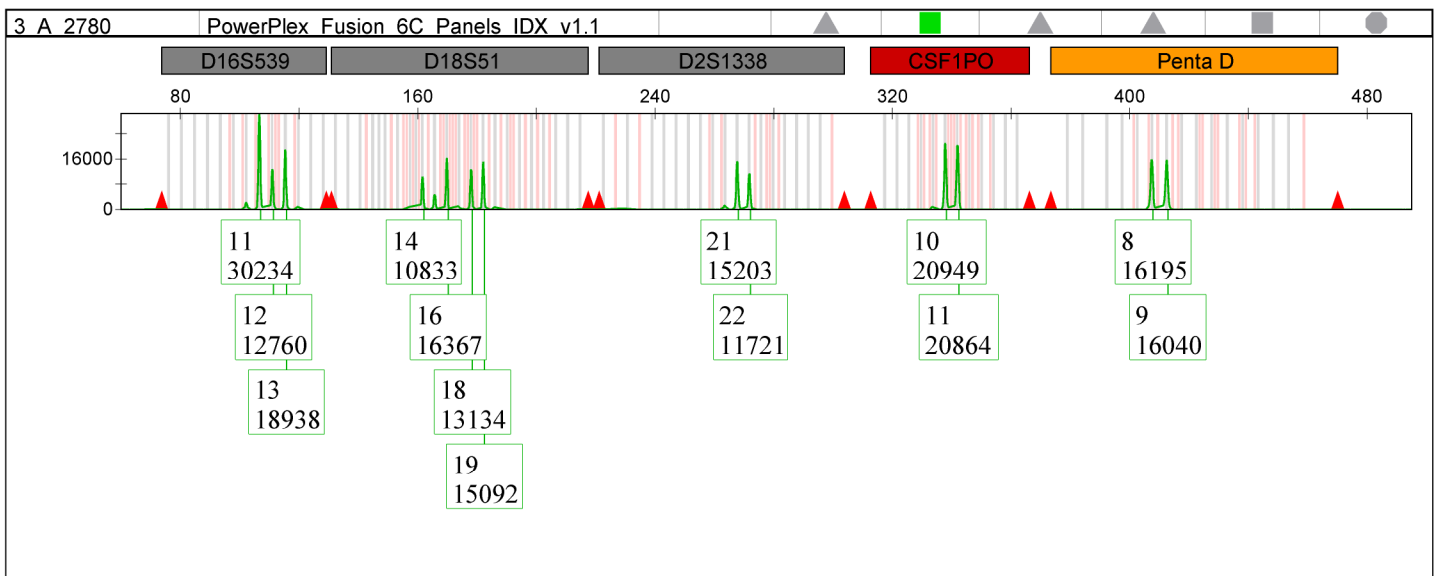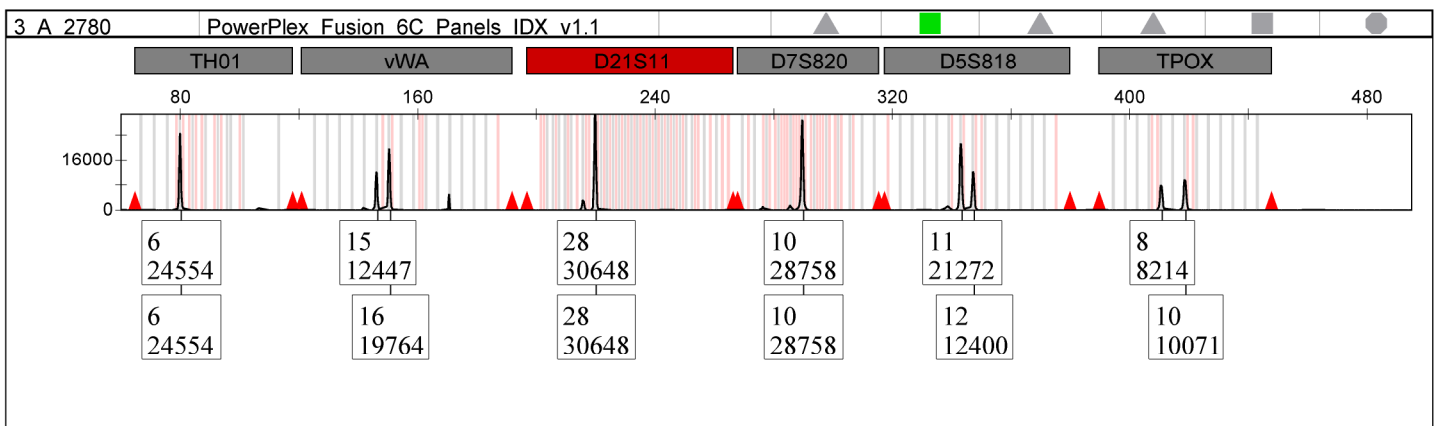

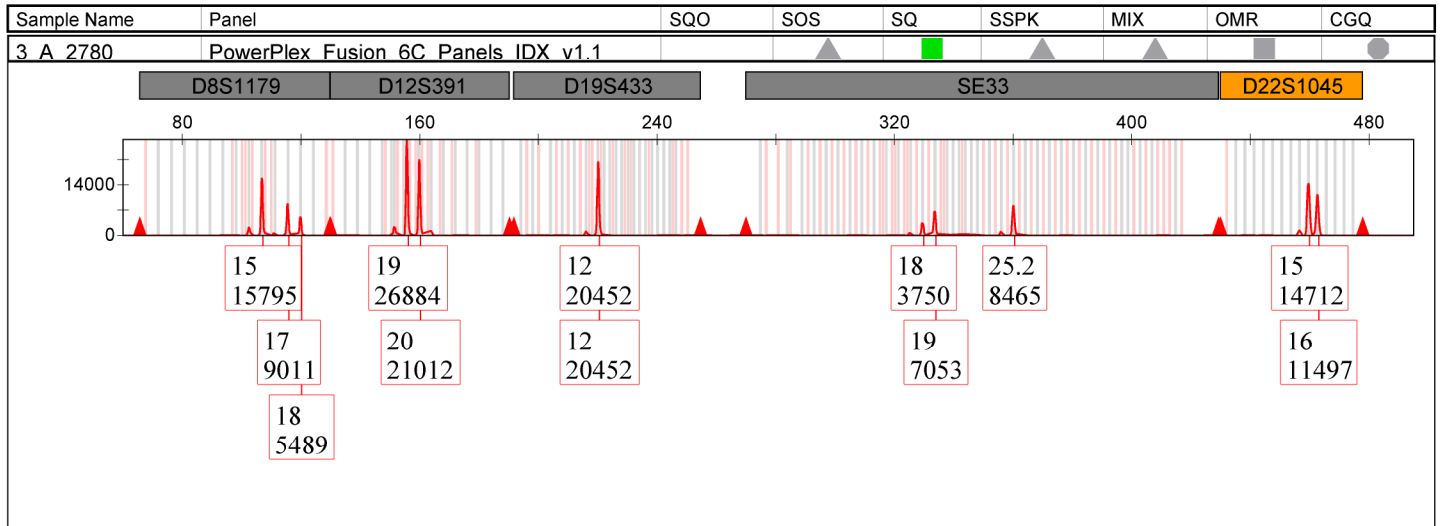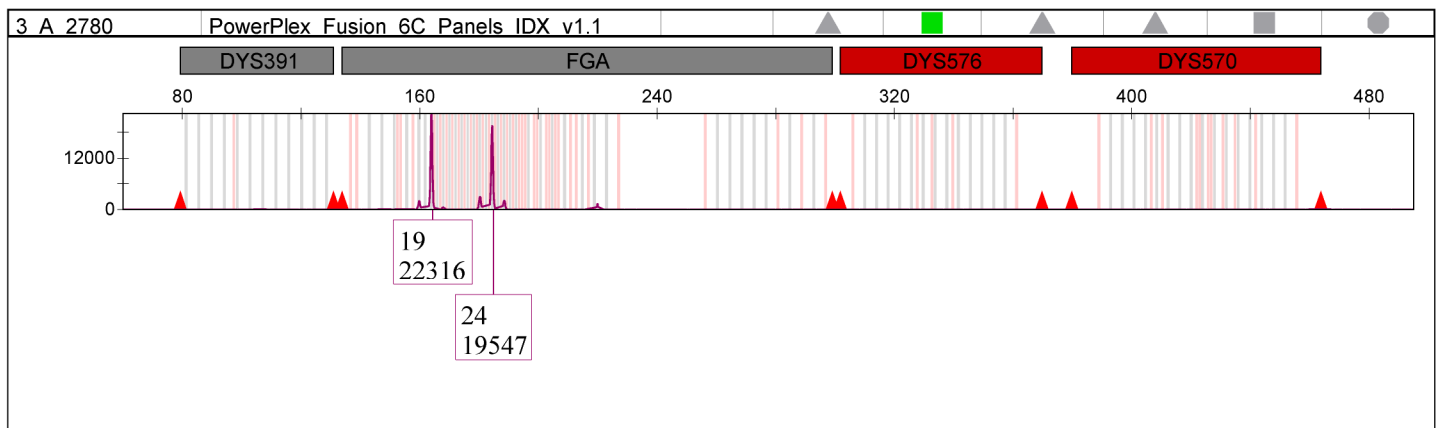

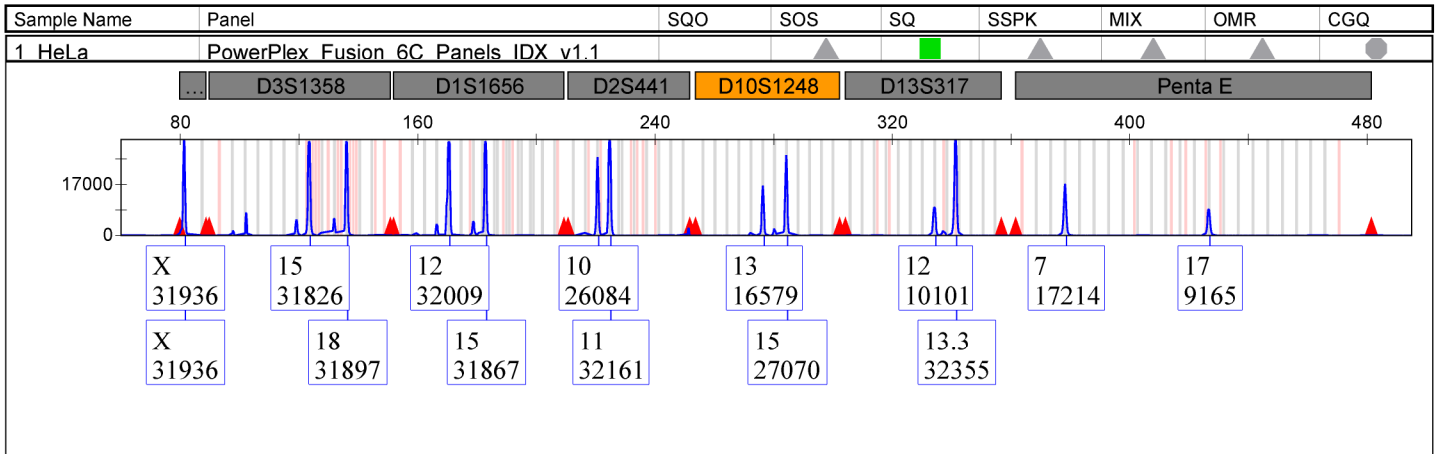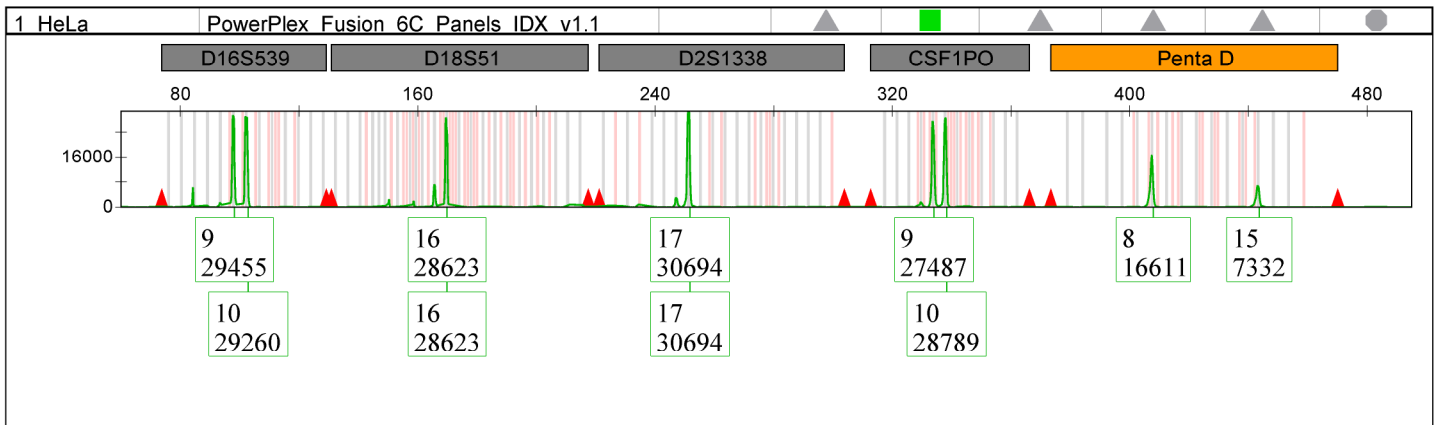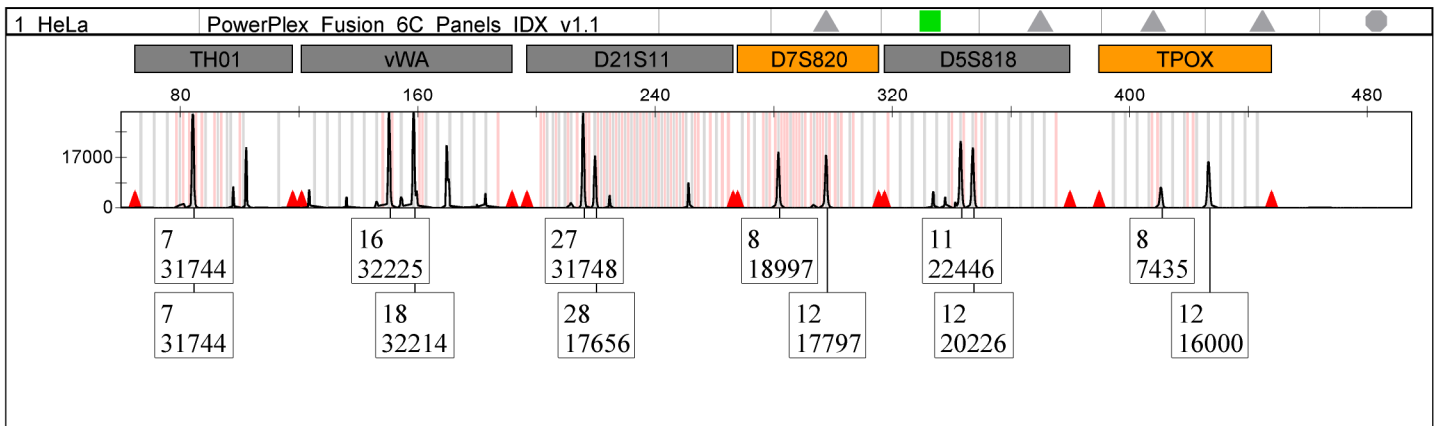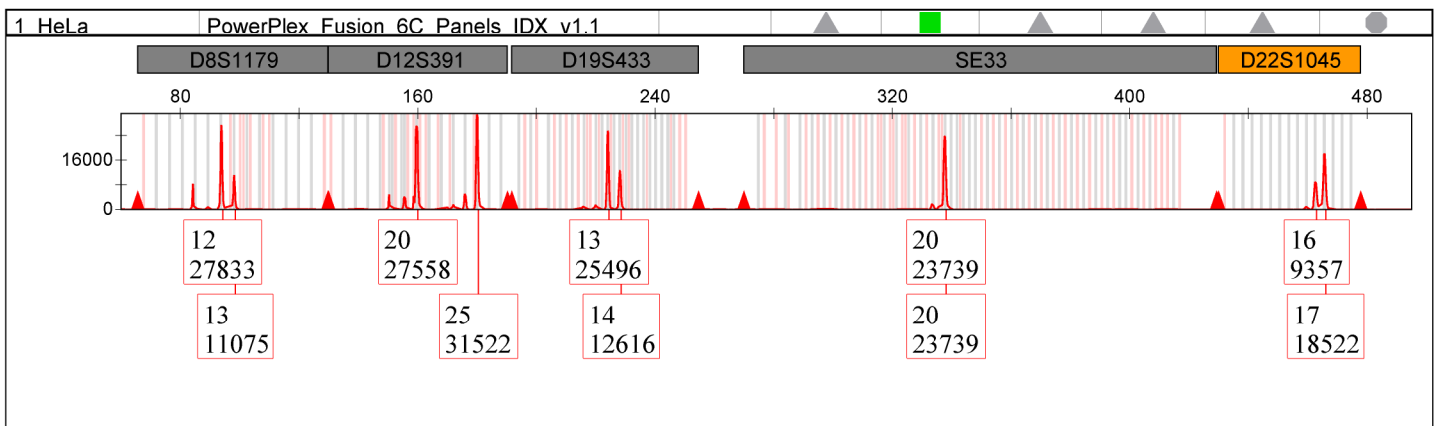

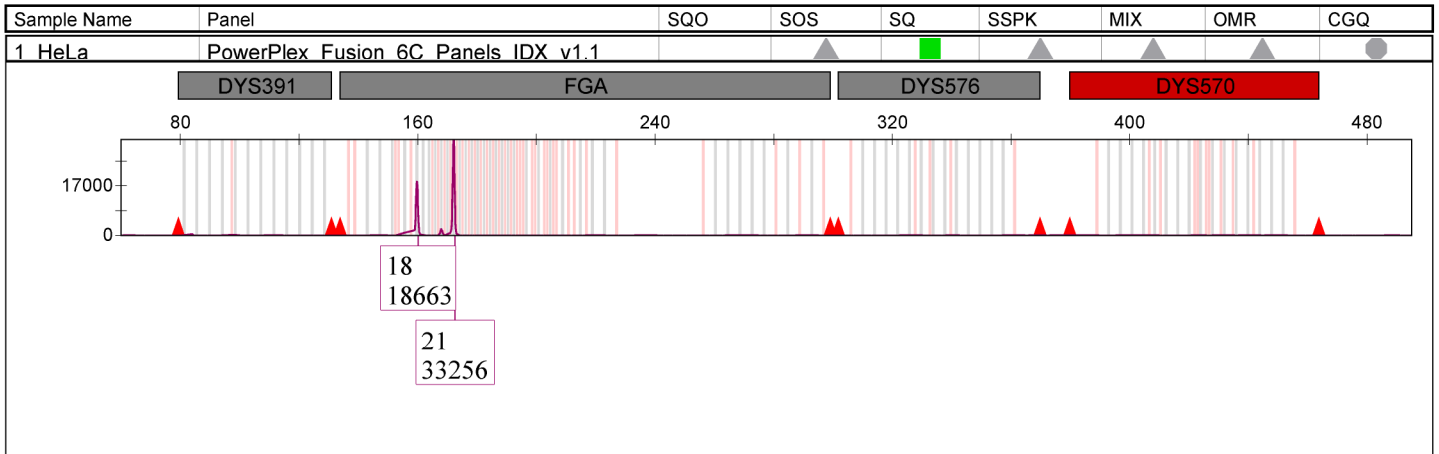

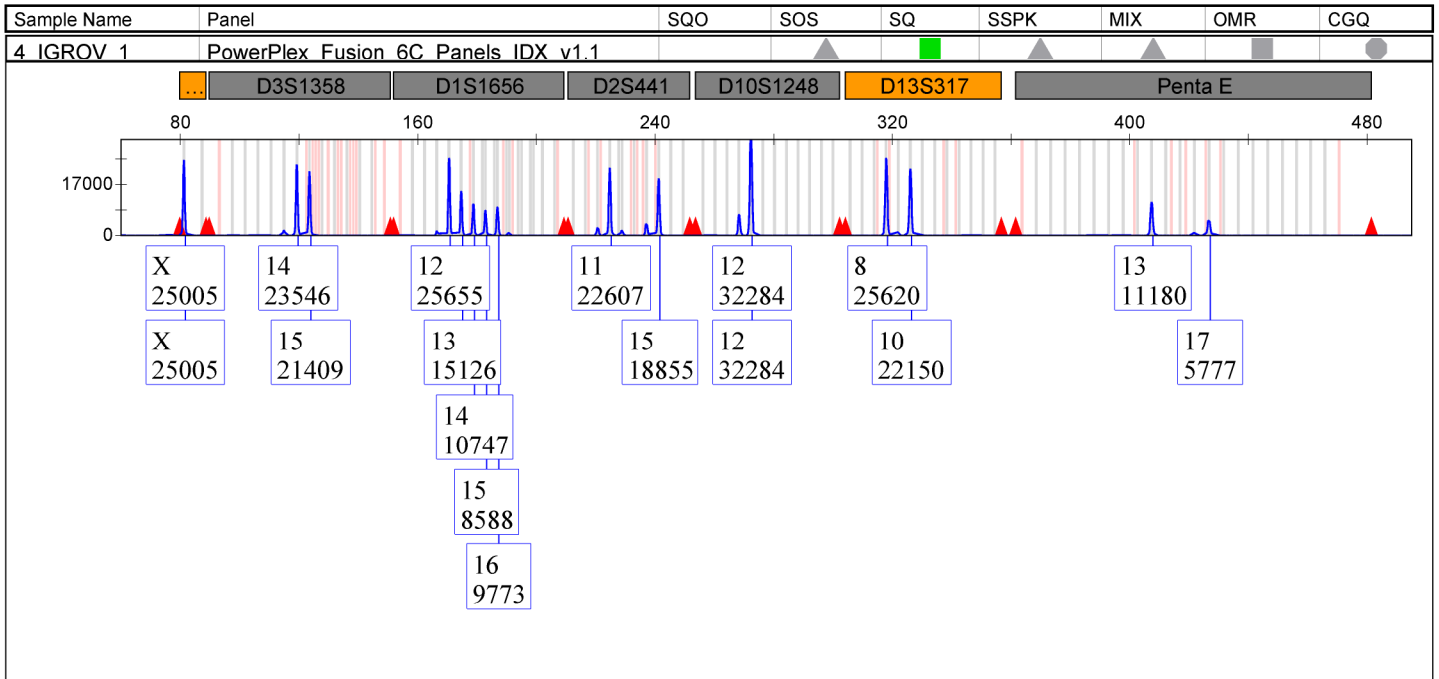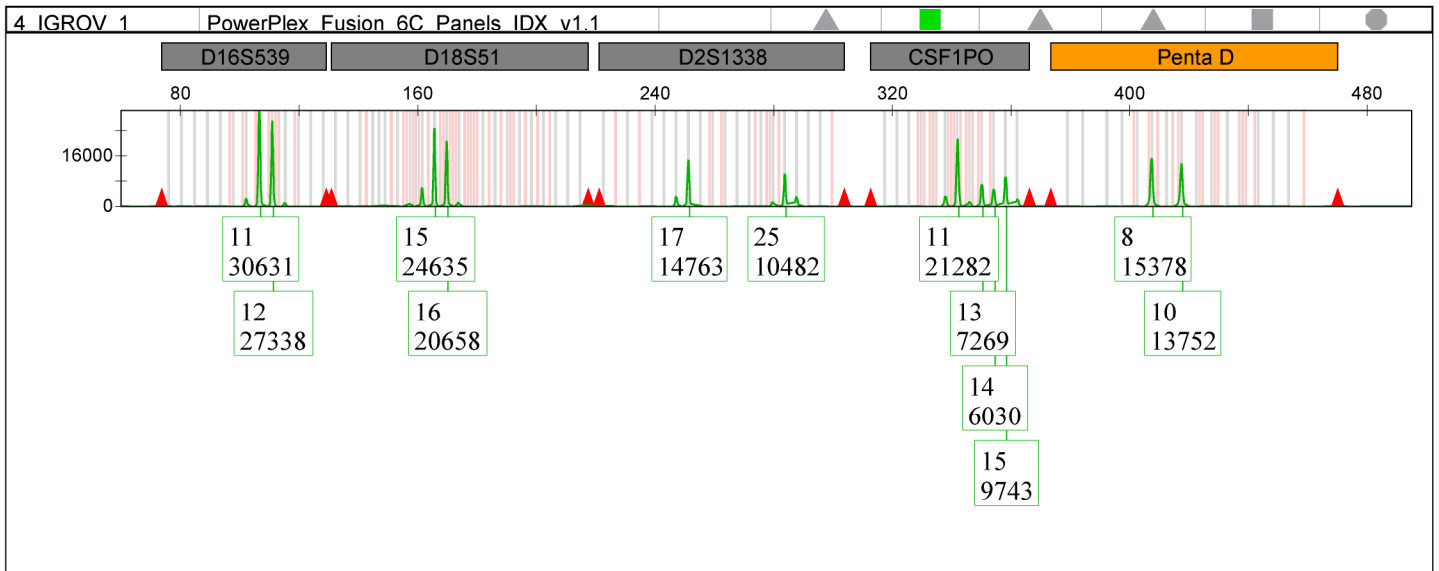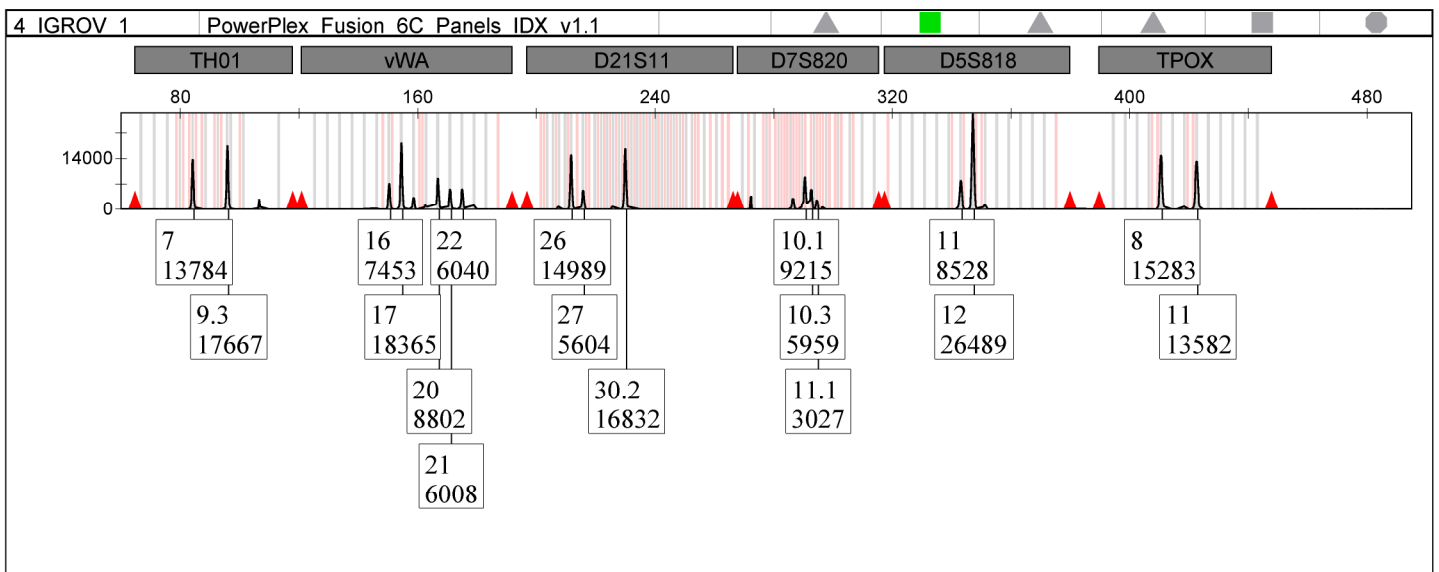

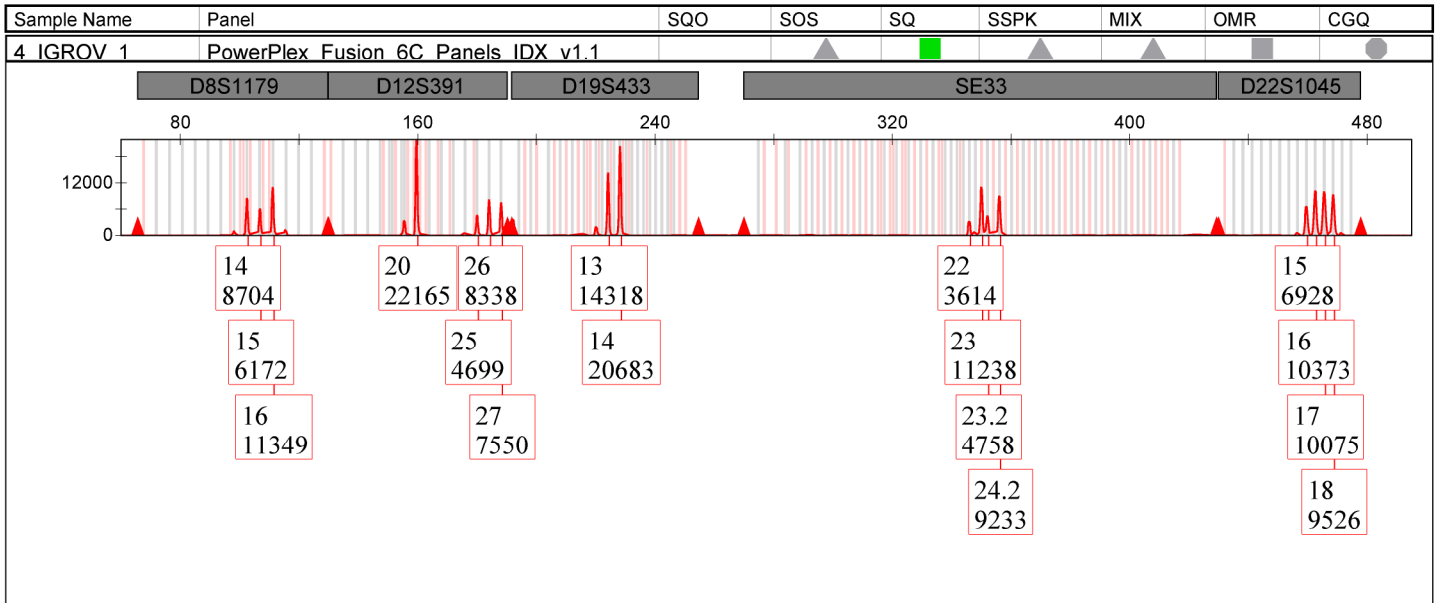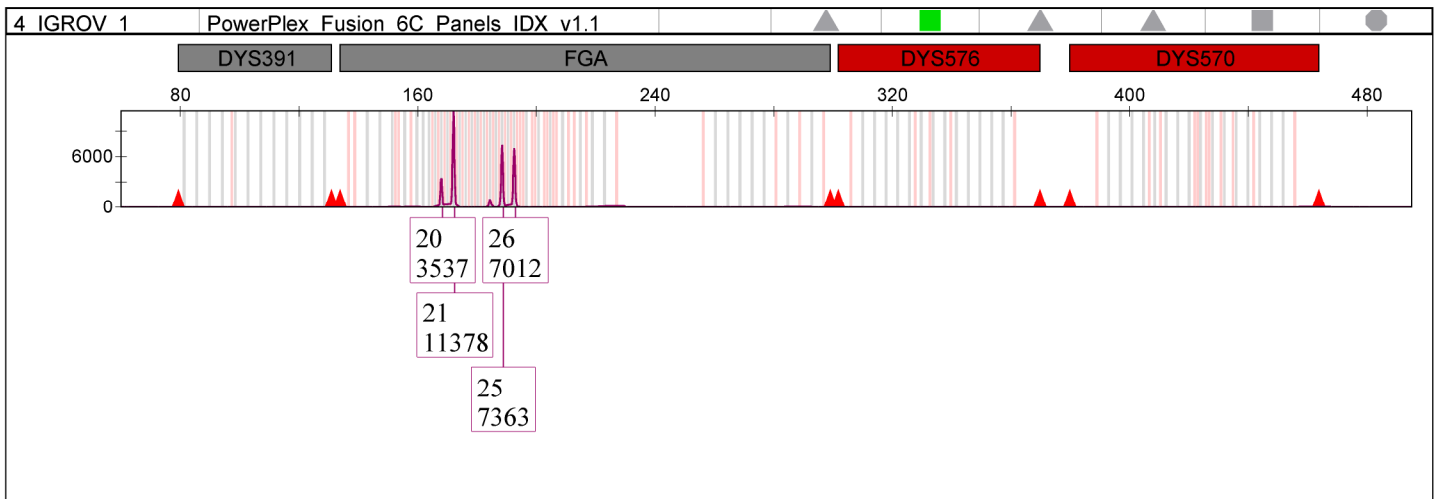

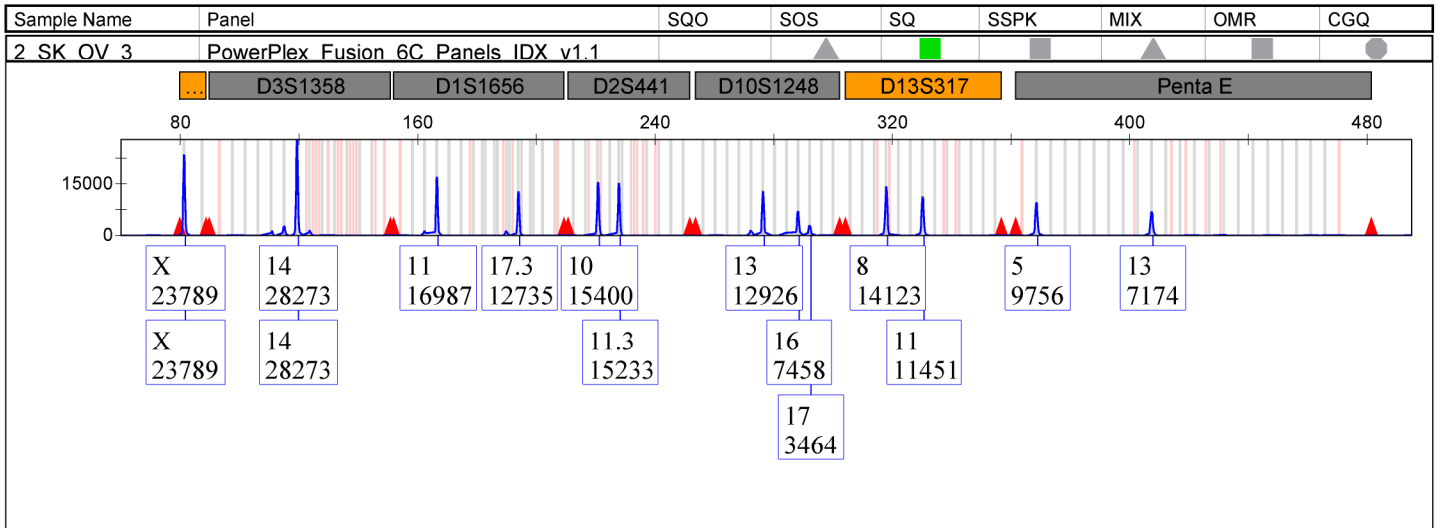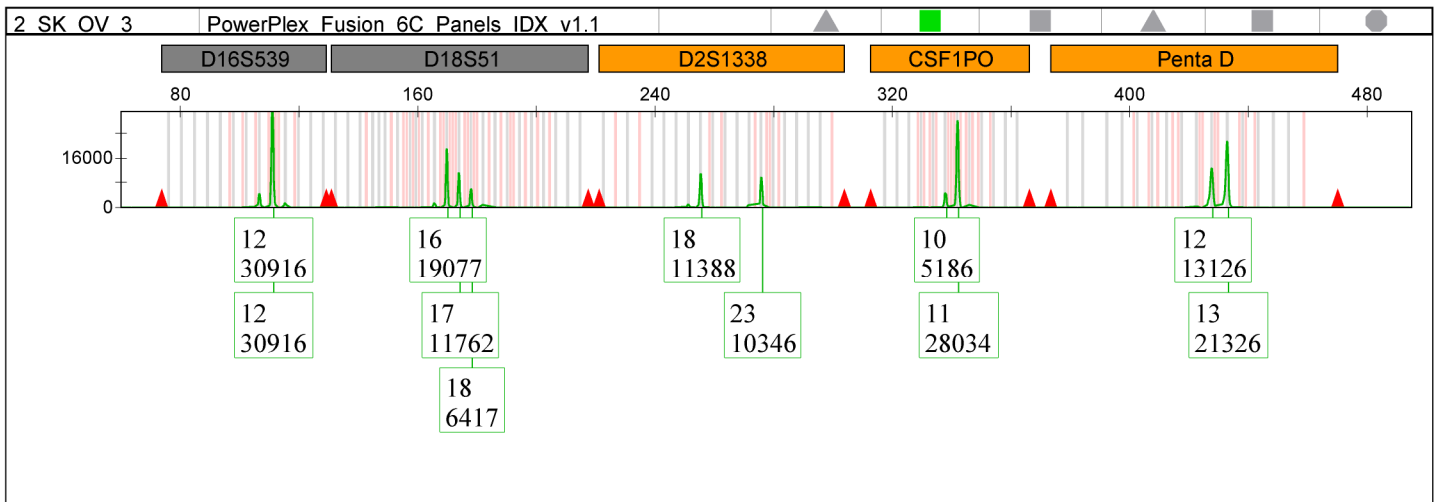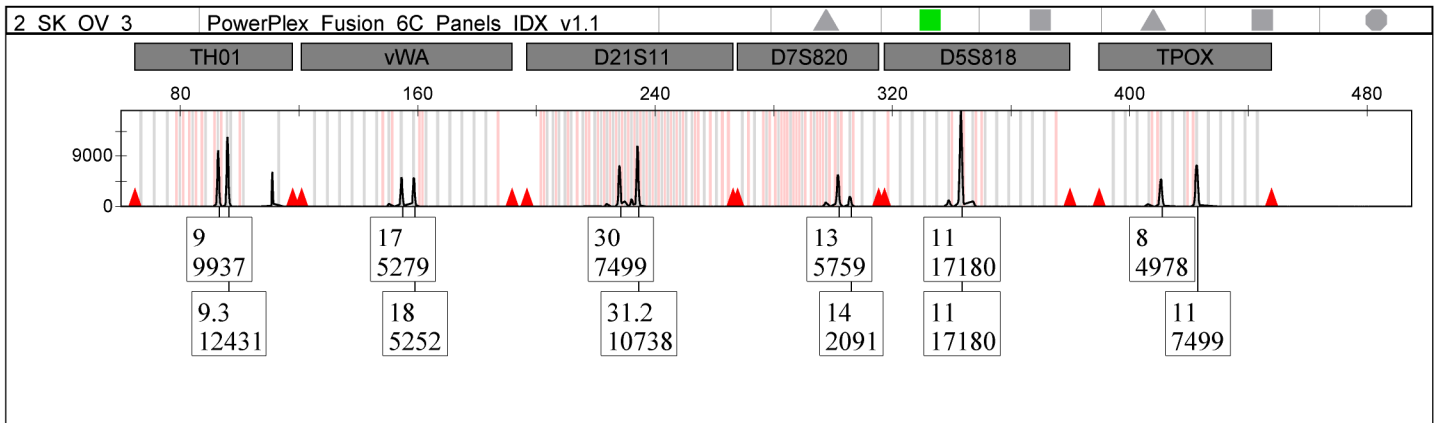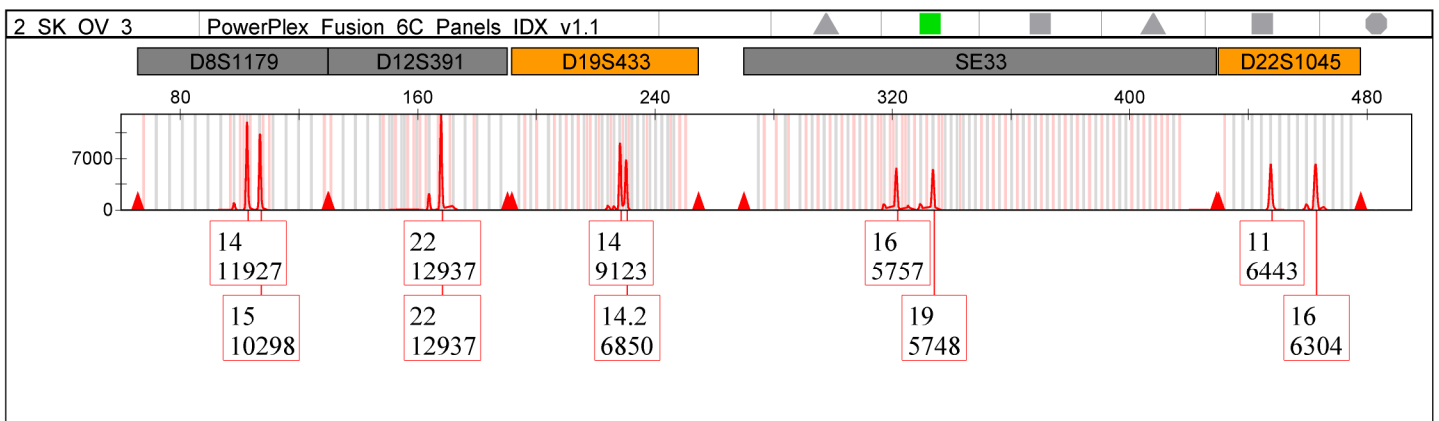

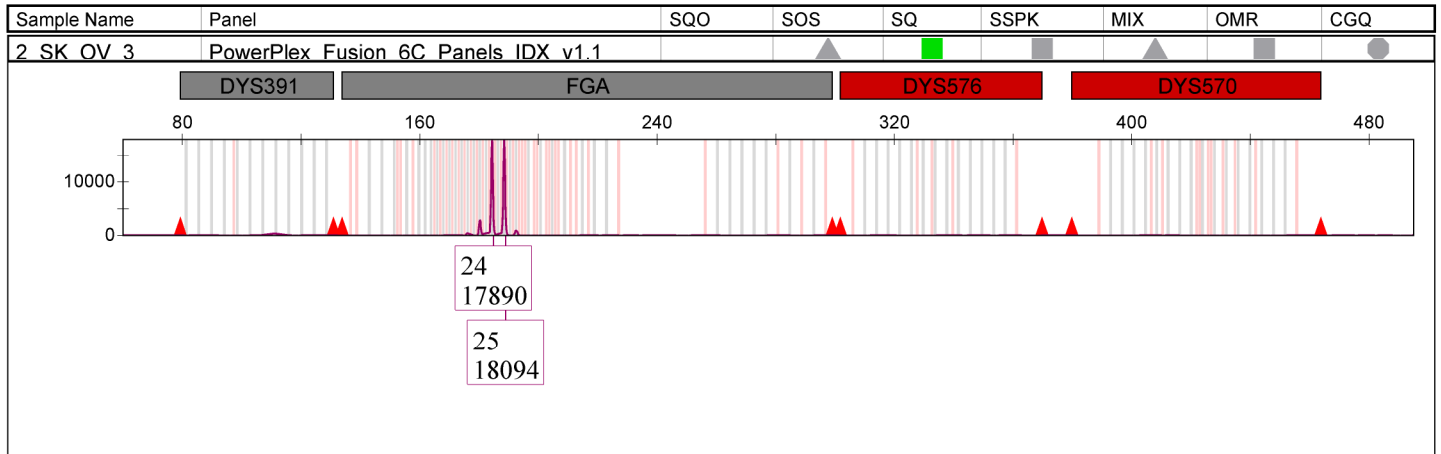



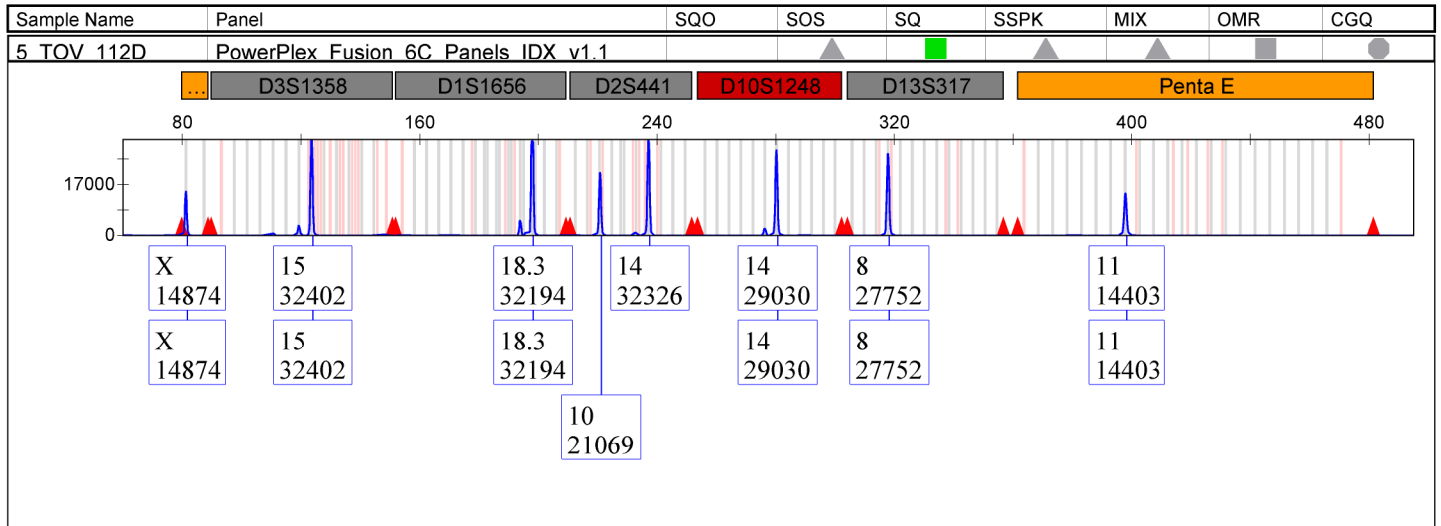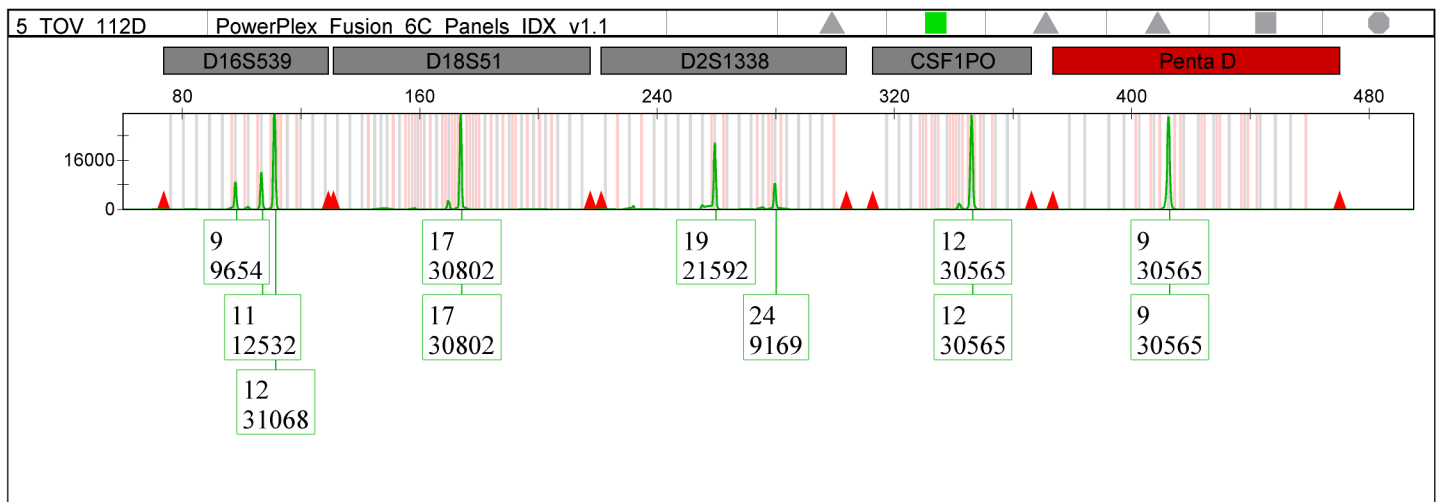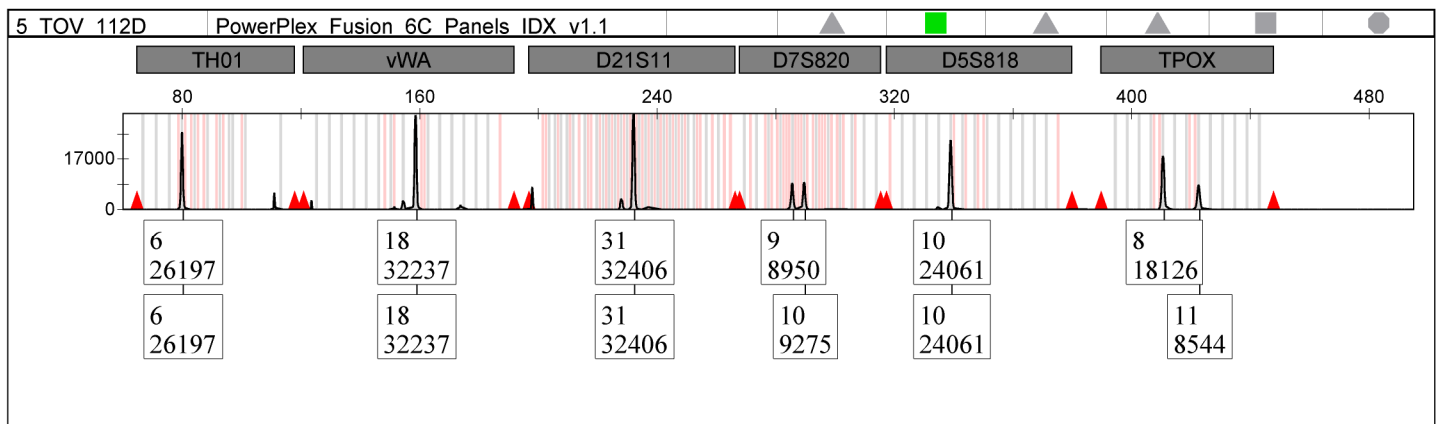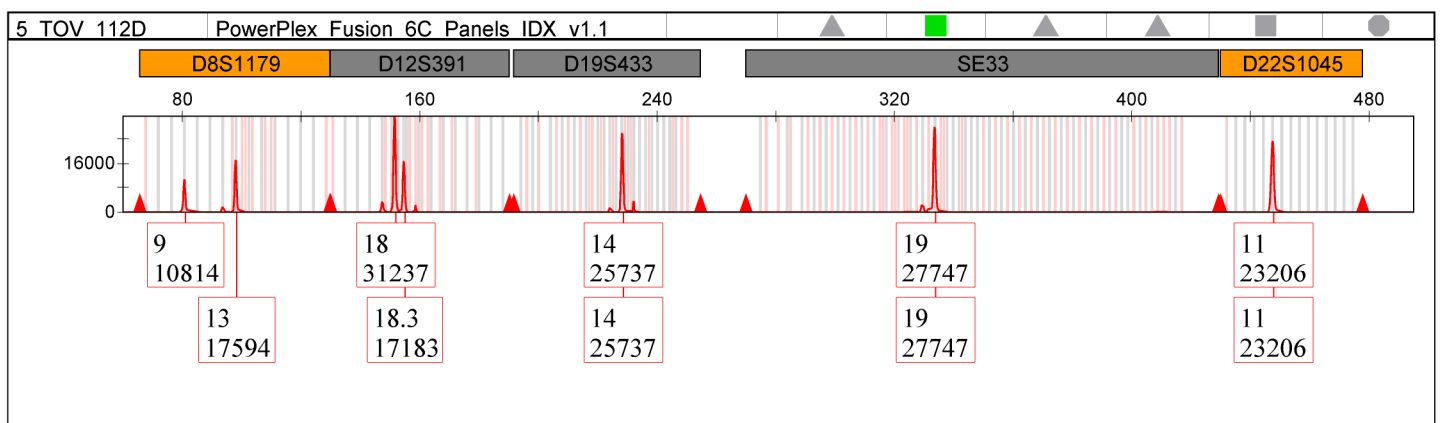

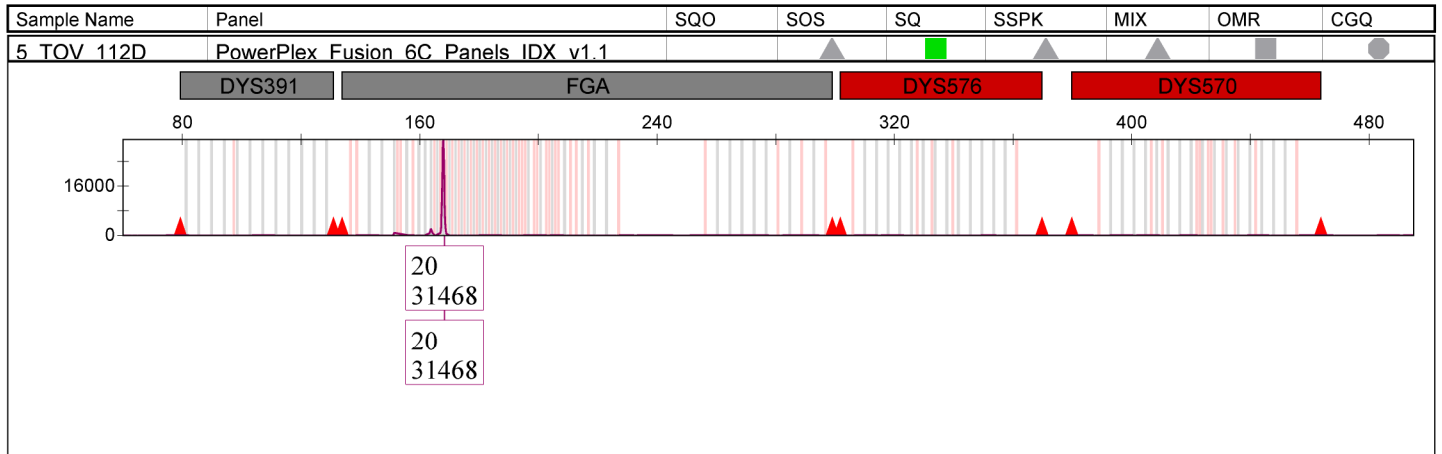

Supplement: s1 [file s1]
